# Supplementary material for: Narrative medicine to investigate the quality of life and emotional impact of inherited retinal disorders through the perspectives of patients, caregivers and clinicians: an Italian multicentre project
Source: PubMed Central journal article supplement — BMJ Open. 2022 Sep 19;12(9):e061080. doi: 10.1136/bmjopen-2022-061080 (PMC9486281; doi:10.1136/bmjopen-2022-061080), 2022-09-19
Supplement: bmjopen-2022-061080.draft_revisions.pdf [file bmjopen-2022-061080.draft_revisions.pdf]

# BMJ Open

BMJ Open is committed to open peer review. As part of this commitment we make the peer review history of every article we publish publicly available.

When an article is published we post the peer reviewers' comments and the authors' responses online. We also post the versions of the paper that were used during peer review. These are the versions that the peer review comments apply to.

The versions of the paper that follow are the versions that were submitted during the peer review process. They are not the versions of record or the final published versions. They should not be cited or distributed as the published version of this manuscript.

BMJ Open is an open access journal and the full, final, typeset and author-corrected version of record of the manuscript is available on our site with no access controls, subscription charges or pay-per-view fees (<http://bmjopen.bmj.com>).

If you have any questions on BMJ Open's open peer review process please email [info.bmjopen@bmj.com](mailto:info.bmjopen@bmj.com)

# BMJ Open

**Narrative Medicine to investigate the quality-of-life and emotional impact of RPE65-related inherited retinal disorders through the per-spectives of patients, caregivers, and clinicians: an Italian multicentre project.**

|                               |                                                                                                                                                                                                                                                                                                                                                                                                                                                                                                                                                                                                                                                                                                                                                                                                                                                                                                                                                                                                                                                                                                                                                                                                                                                                                                                                                                                                                                                                                                                                                                                                                                                                                                                                                                                                                                                                                                                                                                                                                                                                                                                                                                                                                                                                                                                            |
|-------------------------------|----------------------------------------------------------------------------------------------------------------------------------------------------------------------------------------------------------------------------------------------------------------------------------------------------------------------------------------------------------------------------------------------------------------------------------------------------------------------------------------------------------------------------------------------------------------------------------------------------------------------------------------------------------------------------------------------------------------------------------------------------------------------------------------------------------------------------------------------------------------------------------------------------------------------------------------------------------------------------------------------------------------------------------------------------------------------------------------------------------------------------------------------------------------------------------------------------------------------------------------------------------------------------------------------------------------------------------------------------------------------------------------------------------------------------------------------------------------------------------------------------------------------------------------------------------------------------------------------------------------------------------------------------------------------------------------------------------------------------------------------------------------------------------------------------------------------------------------------------------------------------------------------------------------------------------------------------------------------------------------------------------------------------------------------------------------------------------------------------------------------------------------------------------------------------------------------------------------------------------------------------------------------------------------------------------------------------|
| Journal:                      | <i>BMJ Open</i>                                                                                                                                                                                                                                                                                                                                                                                                                                                                                                                                                                                                                                                                                                                                                                                                                                                                                                                                                                                                                                                                                                                                                                                                                                                                                                                                                                                                                                                                                                                                                                                                                                                                                                                                                                                                                                                                                                                                                                                                                                                                                                                                                                                                                                                                                                            |
| Manuscript ID                 | bmjopen-2022-061080                                                                                                                                                                                                                                                                                                                                                                                                                                                                                                                                                                                                                                                                                                                                                                                                                                                                                                                                                                                                                                                                                                                                                                                                                                                                                                                                                                                                                                                                                                                                                                                                                                                                                                                                                                                                                                                                                                                                                                                                                                                                                                                                                                                                                                                                                                        |
| Article Type:                 | Original research                                                                                                                                                                                                                                                                                                                                                                                                                                                                                                                                                                                                                                                                                                                                                                                                                                                                                                                                                                                                                                                                                                                                                                                                                                                                                                                                                                                                                                                                                                                                                                                                                                                                                                                                                                                                                                                                                                                                                                                                                                                                                                                                                                                                                                                                                                          |
| Date Submitted by the Author: | 18-Jan-2022                                                                                                                                                                                                                                                                                                                                                                                                                                                                                                                                                                                                                                                                                                                                                                                                                                                                                                                                                                                                                                                                                                                                                                                                                                                                                                                                                                                                                                                                                                                                                                                                                                                                                                                                                                                                                                                                                                                                                                                                                                                                                                                                                                                                                                                                                                                |
| Complete List of Authors:     | <p>Simonelli, Francesca; University of Campania "L. Vanvitelli", Eye Clinic, Multidisciplinary Department of Medical, Surgical and Dental Sciences<br/>Sodi, Andrea; University of Florence, Department of Neuroscience, Psychology, Drug Research and Child Health<br/>Falsini, Benedetto; Fondazione Policlinico Universitario Agostino Gemelli IRCCS, UOC Oftalmologia<br/>Bacci, Giacomo; Children's Hospital A. Meyer, University of Florence, Pediatric Ophthalmology Unit<br/>Iarossi, Giancarlo; Bambino Gesù IRCCS Pediatric Hospital, Ophthalmology Department<br/>Di iorio, Valentina; University of Campania "L. Vanvitelli", Eye Clinic, Multidisciplinary Department of Medical, Surgical and Dental Sciences<br/>Giorgio, Dario; University of Florence, Department of Neuroscience, Psychology, Drug Research and Child Health<br/>Placidi, Giorgio; Fondazione Policlinico Universitario Agostino Gemelli IRCCS, UOC Oftalmologia<br/>Andrao, Assia; Retina Italia Onlus Association<br/>Reale, Luigi; ISTUD Foundation<br/>Fiorencis, Alessandra; Fondazione ISTUD,<br/>Aoun, Manar; Novartis Farma SpA<br/>Vitiello, Giovanni; University of Campania "L. Vanvitelli", Eye Clinic, Multidisciplinary Department of Medical, Surgical and Dental Sciences<br/>Citro, Amelia; University of Campania "L. Vanvitelli", Eye Clinic, Multidisciplinary Department of Medical, Surgical and Dental Sciences<br/>De Simone, Simona; University of Campania "L. Vanvitelli", Eye Clinic, Multidisciplinary Department of Medical, Surgical and Dental Sciences<br/>De Rienzo, Irene; Careggi University Hospital - Florence, Italy , Department of Ophthalmology<br/>Filimonova, Natalia; Novartis Pharma AG<br/>Fortini, Stefania; Fondazione Policlinico Universitario Agostino Gemelli IRCCS, National Center of Services and Research for the Prevention of Blindness and Rehabilitation of the Visually Impaired, WHOCC ITA-100<br/>Marchese, Cristiana; Retina Italia Onlus Association<br/>Marini, Maria Giulia; Fondazione ISTUD, Healthcare Area<br/>Mucciolo, Dario Pasquale; University of Florence,<br/>Murro, Vittoria; University of Florence, Department of Neuroscience, Psychology, Drug Research and Child Health<br/>Passerini, Ilaria; Careggi Teaching Hospital, Department of Genetic</p> |

1  
2  
3  
4  
5  
6  
7  
8  
9  
10  
11  
12  
13  
14  
15  
16  
17  
18  
19  
20  
21  
22  
23  
24  
25  
26  
27  
28  
29  
30  
31  
32  
33  
34  
35  
36  
37  
38  
39  
40  
41  
42  
43  
44  
45  
46  
47  
48  
49  
50  
51  
52  
53  
54  
55  
56  
57  
58  
59  
60

|           |                                                                                                                                                                                                                                    |
|-----------|------------------------------------------------------------------------------------------------------------------------------------------------------------------------------------------------------------------------------------|
|           | Diagnosis<br>Turco, Simona; Fondazione Policlinico Universitario Agostino Gemelli<br>IRCCS, National Center of Services and Research for the Prevention of<br>Blindness and Rehabilitation of the Visually Impaired, WHOCC ITA-100 |
| Keywords: | Paediatric ophthalmology < OPHTHALMOLOGY, Medical retina <<br>OPHTHALMOLOGY, QUALITATIVE RESEARCH                                                                                                                                  |
|           |                                                                                                                                                                                                                                    |

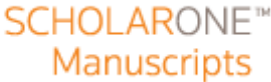

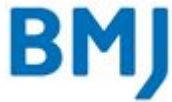

I, the Submitting Author has the right to grant and does grant on behalf of all authors of the Work (as defined in the below author licence), an exclusive licence and/or a non-exclusive licence for contributions from authors who are: i) UK Crown employees; ii) where BMJ has agreed a CC-BY licence shall apply, and/or iii) in accordance with the terms applicable for US Federal Government officers or employees acting as part of their official duties; on a worldwide, perpetual, irrevocable, royalty-free basis to BMJ Publishing Group Ltd ("BMJ") its licensees and where the relevant Journal is co-owned by BMJ to the co-owners of the Journal, to publish the Work in this journal and any other BMJ products and to exploit all rights, as set out in our [licence](#).

The Submitting Author accepts and understands that any supply made under these terms is made by BMJ to the Submitting Author unless you are acting as an employee on behalf of your employer or a postgraduate student of an affiliated institution which is paying any applicable article publishing charge ("APC") for Open Access articles. Where the Submitting Author wishes to make the Work available on an Open Access basis (and intends to pay the relevant APC), the terms of reuse of such Open Access shall be governed by a Creative Commons licence – details of these licences and which [Creative Commons](#) licence will apply to this Work are set out in our licence referred to above.

Other than as permitted in any relevant BMJ Author's Self Archiving Policies, I confirm this Work has not been accepted for publication elsewhere, is not being considered for publication elsewhere and does not duplicate material already published. I confirm all authors consent to publication of this Work and authorise the granting of this licence.

1  
2  
3  
4 1 **Narrative Medicine to investigate the quality-of-life and emotional**  
5  
6 2 **impact of RPE65-related inherited retinal disorders through the**  
7  
8 3 **perspectives of patients, caregivers, and clinicians: an Italian multicentre**  
9  
10 4 **project.**

11  
12  
13 5 Francesca Simonelli<sup>1</sup>, Andrea Sodi<sup>2</sup>, Benedetto Falsini<sup>3,4</sup>, Giacomo Bacci<sup>5</sup>, Giancarlo Iarossi<sup>6</sup>,  
14  
15 6 Valentina Di Iorio<sup>1</sup>, Dario Giorgio<sup>2</sup>, Giorgio Placidi<sup>3,4</sup>, Assia Andrao<sup>7</sup>, BIRDS Working Group, Luigi  
16  
17 7 Reale<sup>8</sup>, Alessandra Fiorencis<sup>8</sup>, Manar Aoun<sup>9</sup>

18  
19 8  
20 9 **BIRDS Working Group:** Giovanni Bosco Vitiello<sup>1</sup>, Amelia Citro<sup>1</sup>, Simona De Simone<sup>1</sup>, Irene De  
21  
22 10 Rienzo<sup>10</sup>, Natalia Filimonova<sup>11</sup>, Stefania Fortini<sup>12</sup>, Cristiana Marchese<sup>7</sup>, Maria Giulia Marini<sup>8</sup>, Dario  
23  
24 11 Pasquale Mucciolo<sup>2</sup>, Vittoria Murro<sup>2</sup>, Ilaria Passerini<sup>13</sup>, Simona Turco<sup>12</sup>

25  
26 12 <sup>1</sup> Eye Clinic, Multidisciplinary Department of Medical, Surgical and Dental Sciences, University of Campania “L.  
27  
28 13 Vanvitelli” – Naples, Italy

29 14 <sup>2</sup> Department of Neuroscience, Psychology, Drug Research and Child Health, University of Florence – Florence,  
30  
31 15 Italy

32 16 <sup>3</sup> UOC Oftalmologia, Fondazione Policlinico Universitario A. Gemelli IRCCS, Rome, Italy

33  
34 17 <sup>4</sup> Università Cattolica del Sacro Cuore, 00168 Rome, Italy

35 18 <sup>5</sup> Pediatric Ophthalmology Unit, Children’s Hospital “A. Meyer”, University of Florence – Florence, Italy

36  
37 19 <sup>6</sup> Ophthalmology Department, Bambino Gesù IRCCS Pediatric Hospital – Rome, Italy

38  
39 20 <sup>7</sup> Retina Italia Onlus Associazione – Italy

40 21 <sup>8</sup> Healthcare Area, Fondazione ISTUD – Milano, Italy

41  
42 22 <sup>9</sup> Novartis Farma – Origgio, Italy,

43 23 <sup>10</sup> Department of Ophthalmology, Careggi University Hospital - Florence, Italy

44  
45 24 <sup>11</sup> Novartis Pharma AG – Basel, Switzerland

46 25 <sup>12</sup> National Center of Services and Research for the Prevention of Blindness and Rehabilitation of the Visually  
47  
48 26 Impaired, WHOCC ITA-100/Fondazione Policlinico Universitario A. Gemelli IRCCS, Roma, Italy

49  
50 27 <sup>13</sup> Department of Genetic Diagnosis, Careggi Teaching Hospital – Florence, Italy

51  
52  
53 29 \*Corresponding authors: Luigi Reale, Healthcare Area, Fondazione ISTUD – via Paolo Lomazzo 19, 20124  
54  
55 30 Milano, Italy. Tel. +39 0323 933 801, Mobile +39 3484759910, e-mail: [lreale@istud.it](mailto:lreale@istud.it)

56 31 Francesca Simonelli, University of Campania “L. Vanvitelli” – via S. Pansini 5, 80131. Tel. +39 081 5666607, e-  
57  
58 32 mail: [francesca.simonelli@unicampania.it](mailto:francesca.simonelli@unicampania.it)

59  
60 33

1  
2  
3 34 **Word count:** 3968 words  
4

5  
6 35 **ABSTRACT**  
7

8 36 **Objectives.** Although inherited RPE65-related retinal disorders (IRDs) significantly impact the vision-  
9  
10 37 related quality of life (VRQoL), their emotional and social aspects remain poorly investigated in Italy.  
11  
12 38 Narrative Medicine (NM) reveals the more intimate aspects of the illness experience, providing  
13  
14 39 insights into clinical practice.  
15  
16

17 40 **Design and setting.** This NM project was conducted in Italy between July and December 2020 and  
18  
19 41 involved five eye clinics specialised in IRDs. Illness plots and parallel charts, together with a  
20  
21 42 sociodemographic survey, were collected through the project's website; in-depth interviews were  
22  
23 43 also conducted. Narratives and interviews were analysed through Nvivo software and interpretive  
24  
25 44 coding.  
26  
27

28  
29 45 **Participants.** Three paediatric and five adult patients and eight caregivers participated in the  
30  
31 46 project; 11 retinologists globally wrote 27 parallel charts; five professionals from hospital-based  
32  
33 47 multidisciplinary teams and one Patient Association member were interviewed.  
34  
35

36  
37 48 **Results.** Findings confirmed that RPE65-related IRDs impact VRQoL in terms of activities and  
38  
39 49 mobility limitations. The emotional aspects emerged as crucial in the clinical encounter and as  
40  
41 50 informative on IRD management challenges and real-life experiences, while psychological support  
42  
43 51 was addressed as critical from clinical diagnosis throughout the care pathway for both patients and  
44  
45 52 caregivers; the need for an IRDs "culture" emerged to acknowledge these conditions and therefore  
46  
47 53 promoting diversity within society.  
48  
49

50  
51 54 **Conclusions.** The project was the first effort to investigate the impact of RPE65-related IRDs on the  
52  
53 55 illness experience through NM, concomitantly addressing the perspectives of paediatric and adult  
54  
55 56 patients, caregivers, and healthcare professionals and provided preliminary insights for the  
56  
57 57 knowledge of RPE65-related IRDs and the clinical practice.  
58  
59  
60

1  
2  
3 58 **Keywords:** inherited retinal dystrophies, *RPE65* gene, narrative medicine, illness experience, quality  
4  
5  
6 59 of life  
7

## 8 60 **STRENGTHS AND LIMITATIONS OF THIS STUDY**

9

- 10 61 • Inclusion of paediatric and adult patients' and hospital-based multidisciplinary team  
11  
12 professionals' perspectives.
- 13 62
- 14  
15 63 • Narrative Medicine approach.
- 16  
17  
18 64 • Preliminary findings to be investigated with further studies.
- 19

## 20 65 **INTRODUCTION**

21

22  
23 66 Affecting about 1 in 2-3,000 people globally [1], Inherited Retinal Disorders (IRDs) constitute a group  
24  
25 67 of clinically and genetically heterogeneous degenerative conditions in which gene mutations affect  
26  
27 68 the proteins necessary to functional vision [2]. A progressive loss of photoreceptor cells and an  
28  
29 69 impairment of the visual function characterise the IRDs related to mutations involving the *RPE65*  
30  
31 70 gene and gradually lead to an irreversible visual decline [3], and potentially to blindness [4]; Leber  
32  
33 71 congenital amaurosis (LCA) and retinitis pigmentosa (RP) represent the most common forms [5,6].  
34  
35  
36  
37 72 Age of onset ranges from early childhood to middle age; visual impairment at low light levels, night  
38  
39 73 blindness and nystagmus are the early symptoms, followed by an increasing deterioration of visual  
40  
41 74 acuity and peripheral vision [7]. While gene therapy represents a promising scenario for treating  
42  
43  
44 75 these conditions [3,8], IRDs management has been mainly support-oriented and focused on  
45  
46 76 monitoring, counselling, and education [3].  
47  
48  
49 77 *RPE65*-related IRDs significantly impact patients in daily activities [9], with implications for their  
50  
51 78 sense of identity [10] and autonomy management [11]; previous studies associate visual impairment  
52  
53 79 with lower social engaging ability [12], self-confidence and vision-related quality of life (VRQoL) [13],  
54  
55  
56 80 as well as with higher levels of depression [14,15].  
57  
58  
59  
60

1  
2  
3 81 Against this backdrop, other studies [16,17] suggest that a holistic and multidisciplinary approach –  
4  
5  
6 82 also addressing IRDs emotional and social aspects – is crucial to support patients and their  
7  
8 83 caregivers.

9  
10 84 The World Health Organisation (WHO) has acknowledged narrative research as informative to  
11  
12  
13 85 address the illness experience [18] in leading clinical practice [19]; a keen focus on narratives  
14  
15 86 resulted in better patient care also in clinical genetics practice [20]. As described in similar studies  
16  
17  
18 87 [21], Narrative Medicine (NM) is based on illness narratives [22] and aims to integrate the *disease-*  
19  
20 88 centred approach, related to the biomedical sphere, with the *illness-* and *sickness-*centred  
21  
22  
23 89 approaches, focusing on the individual and social experience of a condition [23], respectively. NM  
24  
25 90 addresses the possible interventions on a specific disorder by integrating the perspectives of all the  
26  
27  
28 91 actors involved in the care pathway [24], and its findings have been increasingly used to improve  
29  
30 92 the quality of care in clinical practice [25,26].

31  
32 93 The NM project “BIRDS – The Beat of IRD Stories” investigated the RPE65-related IRDs illness  
33  
34  
35 94 experience through the analysis of narratives (a) to reveal the practical, emotional, and social issues  
36  
37 95 linked to these conditions as experienced by patients, caregivers, and healthcare professionals, and  
38  
39  
40 96 (b) to understand the patient’s journey and expectations regarding the gene therapy, to finally  
41  
42 97 provide insights to foster the knowledge on RPE65-related IRDs and clinical practice.

43  
44  
45 98 The present research article focuses on the first goal (a); another study addressed the second one  
46  
47 99 [27]. Although other studies integrated the perspectives of both patients and caregivers [28, 29], to  
48  
49  
50 100 the best of our knowledge, this is the first project that also engages the retinologists and hospital-  
51  
52 101 based multidisciplinary professionals (MDTs) in investigating the RPE65-related IRDs illness  
53  
54 102 experience.

## 55 56 57 103 **METHODS**

### 58 59 104 **Research design and setting** 60



1  
2  
3 105 The project was conducted in Italy between July and December 2020 and targeted paediatric and  
4  
5  
6 106 adult patients with an RPE65-related IRD, their caregivers, retinologists and MDT professionals  
7  
8 107 involved in their care pathway. Participants were enrolled from five eye clinics specialised in IRDs  
9  
10  
11 108 (Supplementary file 1) across Italy. In July 2020, the Steering Committee – composed of five  
12  
13 109 retinologists working in these centres and a Patient Association (PA) member – participated in an  
14  
15 110 online meeting conducted by researchers from ISTUD Foundation to be trained in NM and to discuss  
16  
17  
18 111 the project's goals and design; the Steering Committee, together with other IRD specialists from  
19  
20 112 these centres, were then invited to engage patients and caregivers in participating in the research  
21  
22  
23 113 by accessing the project's webpage <http://www.medicinanarrativa.eu/birds>.

24  
25 114 A clinical RPE65-related IRD diagnosis or the caregiving of a person with an RPE65-related IRD  
26  
27  
28 115 constituted the eligibility criteria for patients and caregivers, as well as the willingness to share their  
29  
30 116 illness experience; however, the ability to write or communicate in Italian was critical for the  
31  
32  
33 117 inclusion.

### 34 35 118 **Data collection**

36  
37 119 Researchers followed the Web Content Accessibility Guidelines (WCAG) 2.1 [30] to ensure survey  
38  
39  
40 120 accessibility. Patients were invited to share their narratives either by writing or recording an audio  
41  
42 121 file; also, caregivers were allowed to support paediatric patients in writing. Narratives were  
43  
44  
45 122 anonymously collected through the Alchemer platform, available on the project's webpage.  
46  
47 123 Afterwards, raw narratives were downloaded as Microsoft Excel spreadsheets.

48  
49 124 A sociodemographic survey and an illness plot [31] were addressed to patients and caregivers;  
50  
51  
52 125 evocative and open words characterised the illness plot to facilitate individual expression [32] and  
53  
54 126 chronologically guide the narrative to identify changes over time. The retinologists' caring  
55  
56  
57 127 experience was gathered through the parallel chart [33], i.e., a personal notebook, parallel to the  
58  
59 128 clinical one, in which to write down thoughts and feelings in a plain language [34]. The patients  
60

1  
2  
3 129 described in parallel charts could not coincide with patients participating in the project. Overall,  
4  
5  
6 130 these investigation tools (Supplementary file 2) addressed two common aspects: (a) the personal  
7  
8 131 and social experience of RPE65-related IRDs from early symptoms onwards, and (b) the VRQoL  
9  
10  
11 132 perception and the current daily life with RPE65-related IRDs.

12  
13 133 Furthermore, in-depth interviews [35] were conducted with MDT professionals and PA members to  
14  
15 134 facilitate the emergence of patient-related issues further; the interviewees approved the transcripts  
16  
17  
18 135 before the analysis.

19  
20 136 The investigation tools were designed by two ISTUD researchers with different academic  
21  
22  
23 137 backgrounds and reviewed by the Steering Committee to reduce any cognitive bias.

#### 24 25 138 **Patient and public involvement**

26  
27  
28 139 Researchers did not engage patients and caregivers in (a) developing the research design and tools,  
29  
30 140 (b) interpreting and discussing the results, and (c) contributing to the writing or editing of this  
31  
32  
33 141 document.

#### 34 35 142 **Ethical considerations**

36  
37 143 The project was performed according to the Declaration of Helsinki. Participants provided their web-  
38  
39  
40 144 based informed consent before their involvement and after being briefed on the project purposes  
41  
42 145 and personal data processing procedures, according to the General Data Protection Regulation of  
43  
44  
45 146 the European Union 2016/679 [36] and the Italian Law 196/2003 [37]. Furthermore, the IRD  
46  
47 147 specialists involved obtained a written informed consent from the parents of paediatric patients  
48  
49  
50 148 during the first briefing on the project methods and purposes.

51  
52 149 The Ethical Committee of the Luigi Vanvitelli University Hospital (Naples, Italy) approved the project  
53  
54  
55 150 in September 2020 (protocol ID 20964/2020).

#### 56 57 151 **Analysis**

58  
59  
60

1  
2  
3 152 Researchers analysed the sociodemographic data through descriptive statistics; answering survey  
4  
5  
6 153 questions or filling in fields in the illness plots and parallel charts was not mandatory, so sample size  
7  
8 154 may vary. Narratives were entered into Nvivo software for coding and analysis [38]. Three narratives  
9  
10  
11 155 for each group and one in-depth interview were collectively coded to assess the consistency across  
12  
13 156 team members; then, each narrative and in-depth interview were separately coded and reviewed  
14  
15 157 during weekly peer debriefings to limit any interpretation bias.  
16  
17  
18 158 Open interpretive coding was employed to identify and analyse the emerging topics in all narratives  
19  
20 159 and in-depth interviews. Moreover, adult patients' and caregivers' narratives and parallel charts  
21  
22  
23 160 were classified following: (a) Kleinman's classification [23], which identifies *disease-*, *illness-*, and  
24  
25 161 *sickness-related* aspects in narratives; (b) Bury's classification [39], which distinguishes among  
26  
27  
28 162 *contingent narratives* (concerning a condition's immediate effects on daily life), *core narratives*  
29  
30 163 (connecting the illness experience to deeper and cultural levels of meaning) and *moral narratives*  
31  
32 164 (highlighting an evaluative and social dimension).  
33  
34  
35 165 Researchers asked the participants to describe RPE65-related IRDs through a metaphor to trace  
36  
37 166 spontaneous meaning associations through daily language.  
38  
39  
40 167 The Steering Committee discussed the results to address the emerged issues and data interpretation  
41  
42 168 collectively. Researchers followed the Standards for Reporting Qualitative Research (SRQR)  
43  
44  
45 169 guidelines [40].

## 46 47 170 **RESULTS**

48  
49  
50 171 Three paediatric and five early-onset adult patients and eight caregivers participated in the project,  
51  
52 172 as well as 11 retinologists specialised in IRDs, who wrote 27 parallel charts; all patients chose to  
53  
54  
55 173 share their experience in writing. In-depth interviews were conducted with five MDT professionals  
56  
57 174 – i.e., two genetic counselors, two psychologists and one orientation and mobility (O&M) instructor  
58  
59  
60

175 – and one PA member. Table 1 summarises the sociodemographic data of participants, including  
 176 non-responders as a separate category.

**Table 1 – Sociodemographic data of participants**

|                                    | Patients<br>(N=8) | Caregivers<br>(N=8) | Patients in<br>parallel charts<br>(N=27) | Retinologists<br>(N=11) | Professionals<br>interviewed<br>(N=6) |
|------------------------------------|-------------------|---------------------|------------------------------------------|-------------------------|---------------------------------------|
| <b>Gender</b>                      |                   |                     |                                          |                         |                                       |
| Female                             | 6 (75%)           | 6 (75%)             | 12 (44%)                                 | 5 (45%)                 | 5 (83%)                               |
| Male                               | 2 (25%)           | 2 (25%)             | 15 (56%)                                 | 6 (55%)                 | 1 (17%)                               |
| <b>Age (yrs)</b>                   |                   |                     |                                          |                         |                                       |
| Median (range)                     | 26 (8-63)         | 44 (31-70)          | 17 (5-65)                                | 42 (32-64)              | 54 (49-67)                            |
| <b>Geographic residence</b>        |                   |                     |                                          |                         |                                       |
| Northern Italy                     | 3 (38%)           | 2 (24%)             | -                                        | -                       | 2 (33%)                               |
| Central Italy                      | 4 (50%)           | 4 (50%)             | -                                        | 8 (73%)                 | 4 (67%)                               |
| Southern Italy                     | 1 (12%)           | 1 (13%)             | -                                        | 3 (27%)                 | -                                     |
| Non-responders                     | -                 | 1 (13%)             | -                                        | -                       | -                                     |
| <b>Education</b>                   |                   |                     |                                          |                         |                                       |
| Elementary school                  | 1 (12%)           | -                   | 7 (26%)                                  | -                       | -                                     |
| Middle school                      | -                 | 1 (12%)             | 4 (15%)                                  | -                       | -                                     |
| High school                        | 1 (12%)           | 3 (38%)             | 4 (15%)                                  | -                       | -                                     |
| Bachelor/Master                    | 3 (38%)           | 3 (38%)             | 3 (11%)                                  | -                       | -                                     |
| Non-responders                     | 3 (38%)           | 1 (12%)             | 9 (33%)                                  | -                       | -                                     |
| <b>Employment status</b>           |                   |                     |                                          |                         |                                       |
| Student                            | 4 (50%)           | -                   | 16 (59%)                                 | -                       | -                                     |
| Working                            | 3 (38%)           | 6 (76%)             | 10 (37%)                                 | -                       | -                                     |
| Not working                        | -                 | -                   | -                                        | -                       | -                                     |
| Retired                            | -                 | 1 (12%)             | 1 (4%)                                   | -                       | -                                     |
| Non-responders                     | 1 (12%)           | 1 (12%)             | -                                        | -                       | -                                     |
| <b>Marital state</b>               |                   |                     |                                          |                         |                                       |
| Single                             | 6 (75%)           | 1 (12%)             | 18 (67%)                                 | -                       | -                                     |
| Married                            | 2 (25%)           | 5 (64%)             | 7 (26%)                                  | -                       | -                                     |
| Separated                          | -                 | 1 (12%)             | 2 (7%)                                   | -                       | -                                     |
| Non-responders                     | -                 | 1 (12%)             | -                                        | -                       | -                                     |
| <b>Professional activity (yrs)</b> |                   |                     |                                          |                         |                                       |
| Median (range)                     | -                 | -                   | -                                        | 16 (6-41)               | 23 (19-35)                            |
| <b>Specialisation</b>              |                   |                     |                                          |                         |                                       |
| Ophthalmology                      | -                 | -                   | -                                        | 8 (73%)                 | 1 (17%)                               |
| Paediatric ophthalmology           | -                 | -                   | -                                        | 1 (9%)                  | -                                     |
| Orthoptics                         | -                 | -                   | -                                        | 2 (18%)                 | -                                     |
| Medical Genetics                   | -                 | -                   | -                                        | -                       | 1 (17%)                               |
| O&M Training                       | -                 | -                   | -                                        | -                       | 1 (17%)                               |
| Psychology                         | -                 | -                   | -                                        | -                       | 2 (32%)                               |
| Other                              | -                 | -                   | -                                        | -                       | 1 (17%)                               |
| <b>Workplace</b>                   |                   |                     |                                          |                         |                                       |
| Hospital                           | -                 | -                   | -                                        | 2 (18%)                 | -                                     |

|            |   |   |   |         |         |
|------------|---|---|---|---------|---------|
| University | - | - | - | 9 (82%) | 2 (33%) |
| Hospital   |   |   |   |         |         |
| Other      |   |   |   |         | 4 (67%) |

*Data are presented as n(%) or median (range).*

177

Results are presented along four main lines: (a) the RPE65-related IRDs experience analysed through narrative classifications and metaphors; (b) the emotional issues before and upon the clinical diagnosis; (c) VRQoL perception, the condition's impact on daily life and participants' expectations; (d) insights from in-depth interviews. Figures 1-3 and Tables 2-5 provide quotes from the narratives, while four narratives are available in English in Supplementary file 3; we reduced the risk of re-identification by applying different codes from those used to identify participants during data collection.

### **The RPE65-related IRDs experience in the narratives**

Overall, almost all classified narratives highlighted illness-related aspects [23] (Figure 1); adult patients' narratives lacked a clinical language, which conversely characterised 63% of the caregivers' narratives and 37% of the parallel charts. Sickness-related issues were present in 50% of the caregivers' narratives and in 11% of the parallel charts, while they emerged in all adult patients' narratives.

[Figure 1]

Core narratives [39] prevailed in parallel charts (74%) and were equally reported (50%) as moral narratives by caregivers (Figure 2); only parallel charts presented contingent narratives (11%). Moral narratives were prevalent among adult patients (60%), while discomfort, disbelief (particularly at school) and the search for independence represented three spontaneously emerged issues in all narratives.

[Figure 2]

Metaphors were clustered into four thematic groups (Figure 3): (a) those referring to light and hope, used by patients (33%) and in parallel charts (15%); (b) those concerning limitations and impairment,

equally reported (50%) by patients and caregivers; (c) those related to darkness and mist, used by caregivers (33%) and in parallel charts (40%); (d) and metaphors denoting pain and isolation, almost equally used by patients and caregivers, and in parallel charts.

[Figure 3]

### Emotional issues upon the clinical diagnosis and the clinical encounter

Patients reported having had the first signs of visual impairment at two years and three months of age (median value; range 0,5-6). In narratives, all patients reported issues that arose during early childhood, and that their parental caregivers identified as critical, e.g., being attracted by light sources or tripping (*In the evening, my parents used to cover the kitchen lamp, otherwise I would spend hours just staring at it*, Patient 002). As shown in Table 2, patients described early living with an RPE65-associated IRD either as uncomfortable (62%), mainly referring to the feeling of “being wrong”, caused by the informal tests or eye examinations they were subjected to by their parents, or – conversely – normal (38%), since they did not have any standard of comparison to evaluate their sight. Caregivers reported having felt worried (50%) or helpless (50%) in the same years. During the communication of the clinical diagnosis, 71% of patients had no reaction, while the other 29% reported that it allowed them to identify their condition; conversely, parental caregivers (75%) felt hopeless, while partner caregivers (25%) reported concern for the hereditariness of the condition.

**Table 2 – Patients’ and caregivers’ emotions before and at the diagnosis of RPE65-related IRD**

|                         |                      | Patients                                                                                                                                                                                                                                                                                                                                                |
|-------------------------|----------------------|---------------------------------------------------------------------------------------------------------------------------------------------------------------------------------------------------------------------------------------------------------------------------------------------------------------------------------------------------------|
| <b>Before diagnosis</b> | Normal (38%)         | <i>– I have always felt normal. I never had the feeling that the slight differences I noticed could be a problem, or part of a problem. (Patient 004)</i>                                                                                                                                                                                               |
|                         | Uncomfortable (62%)  | <i>– I felt their disappointment, their concern... They were not happy with me, and I felt wrong, because my answers were wrong. I couldn’t see, and I couldn’t help but guess... (Patient 002)</i>                                                                                                                                                     |
| <b>At diagnosis</b>     | Identification (29%) | <i>– Somehow, finally identifying the problem brought me out of my limbo: for years, I had been the child who saw little during the day and who couldn’t see at night; now I finally knew why. I became familiar with terms such as “blindness”, “low vision”, or “disability”, concepts that would later radically change my future. (Patient 001)</i> |

1  
2  
3  
4  
5  
6  
7  
8  
9  
10  
11  
12  
13  
14  
15  
16  
17  
18  
19  
20  
21  
22  
23  
24  
25  
26  
27  
28  
29  
30  
31  
32  
33  
34  
35  
36  
37  
38  
39  
40  
41  
42  
43  
44  
45  
46  
47  
48  
49  
50  
51  
52  
53  
54  
55  
56  
57  
58  
59  
60

|  |               |                                                                                                                                          |
|--|---------------|------------------------------------------------------------------------------------------------------------------------------------------|
|  | Neutral (71%) | – Honestly, I wasn't much affected. The disease has always been part of me. I grew up with it, I gradually got used to it. (Patient 004) |
|--|---------------|------------------------------------------------------------------------------------------------------------------------------------------|

### Caregivers

|                         |                       |                                                                                                                                                                                                                                        |
|-------------------------|-----------------------|----------------------------------------------------------------------------------------------------------------------------------------------------------------------------------------------------------------------------------------|
| <b>Before diagnosis</b> | Worry 50%             | – I felt helpless, terrified, and afraid. (Caregiver 003)                                                                                                                                                                              |
|                         | Helplessness 50%      | – I felt terrible, because I understood the challenge, but I couldn't do much, except hold her hand. (Caregiver 006)                                                                                                                   |
| <b>At diagnosis</b>     | Hopelessness 75%      | – I felt terrible. It's something you don't expect: a hereditary disease of a genetic nature in a family where there were no known cases seems impossible. (Caregiver 008)                                                             |
|                         | Fear for children 25% | – In the beginning, it scared me: the fear that our other children could suffer from a similar condition. Our anxiety decreased with time: I saw her, I saw she was restricted but not blocked, which gave me courage. (Caregiver 005) |

Table 3 summarises the clinicians' feelings the first time they met their patients and at the beginning of the care pathway. During the first visit, 37% of parallel charts reported the thought that the path would have been challenging, while 30% reported hopefulness over the care options; conversely, 22% focused on a sense of sorrow for the patient, and 11% on the empathy with patients or caregivers. At the beginning of the care relationship, clinicians felt on one side emotionally involved or motivated to do their best (58%), and on the other side helpless (30%) or "guilty" for being in a privileged situation compared to the patient (12%).

**Table 3 – Retinologists' emotions at first visit and at the beginning of the care relationship**

|                                                  |                                                |                                                                                                                                                                                                                                                                                                                                                                     |
|--------------------------------------------------|------------------------------------------------|---------------------------------------------------------------------------------------------------------------------------------------------------------------------------------------------------------------------------------------------------------------------------------------------------------------------------------------------------------------------|
| <b>At the first visit</b>                        | A challenge for both clinician and patient 37% | – I thought that this visit was a challenge for us both: for her, it meant undergoing new tests and knowing the results; for me, it meant dedicating myself to another person to whom I could dedicate my care. I also thought that she might have access to treatment in the future, and I was ready and willing to facilitate this. (Parallel chart 007)          |
|                                                  | Hope 30%                                       | – I thought it was essential to follow her carefully from a clinical perspective, and that it was imperative to have a genetic test. When she showed it to me, I realized that she had a treatable mutation, which gave me hope. (Parallel chart 015)                                                                                                               |
|                                                  | Sorrow 22%                                     | – Poor child, he is not living his life like his healthy peers. (Parallel chart 002)                                                                                                                                                                                                                                                                                |
|                                                  | Empathy with patient or caregiver 11%          | – I thought that he was the same age as me, but that he had a completely different visual situation from mine. I stepped out of the treating doctor's shoes, and I found myself projected into an essentially human dimension. I put myself in her shoes and listened to her story with my heart as well as my ears. (Parallel chart 006)                           |
| <b>At the beginning of the care relationship</b> | Emotional involvement and motivation 58%       | – I was impressed by what I was seeing, powerless but at the same time full of motivation and hope. I knew the child's mutation, and I imagined that – given his young age – he might have a therapeutic chance. I leveraged this last point in my talk with his parents, trying to give them a cautious hope and making them understand that this specific genetic |

|                    |                                                                                                                                                                                                                               |
|--------------------|-------------------------------------------------------------------------------------------------------------------------------------------------------------------------------------------------------------------------------|
|                    | <i>mutation meant being severely visually impaired, but also the possibility of being cured in a not distant future. (Parallel chart 005)</i>                                                                                 |
| Helplessness 30%   | <i>– Despite my knowledge, I felt powerless, unable to give immediate and concrete answers to many of his practical problems. (Parallel chart 019)</i>                                                                        |
| Sense of guilt 12% | <i>– I felt ashamed... I’m lucky, I think I have a successful life, and yet I often get irritated or discouraged by stupid things, while he always seems happy to live his life, despite everything. (Parallel chart 021)</i> |

In addition, 33% of the parallel charts highlighted the importance of showing empathy from the very beginning of the care relationship.

As for the currently living with an RPE65-related IRD (Table 4), patients reported a sense of uncertainty (25%), due to increasing visual impairment, or discomfort and sadness (25%); conversely, 50% reported to feel serene or hopeful, also considering the possibility of undergoing gene therapy. Caregivers declared to have accepted the condition (38%) and to live more serenely (62%), due to the awareness of having done their best. In parallel charts, clinicians reported positive feelings (44%), dedication (37%), and motivation (19%) toward patients.

**Table 4 – The current feelings of participants: distribution and quotes from narratives**

| Patients                       |                                                                                                                                                                                                                                                                                                                                                                                                                                                                                                                                                                                                                                                           |
|--------------------------------|-----------------------------------------------------------------------------------------------------------------------------------------------------------------------------------------------------------------------------------------------------------------------------------------------------------------------------------------------------------------------------------------------------------------------------------------------------------------------------------------------------------------------------------------------------------------------------------------------------------------------------------------------------------|
| <b>Uncertainty 25%</b>         | <i>– Today I feel poised between light and shadow. I feel like someone who chases a ball without ever reaching it. I am 42 years old, and I have spent my life being told that science works miracles, and that life is long, and that progress for me will come soon. I am 42, though, not 10... My sight is progressively worsening. I feel tangible differences over a few months, days in some cases. I can remember things from a few months ago, visual details that I no longer see today. In fact, it’s not that I don’t see them: I perceive them as covered by a veil. Glossy... Like old photographs, but far less poetic... (Patient 001)</i> |
| <b>Discomfort, sadness 25%</b> | <i>– I feel sad: when mum or dad are driving, in the afternoon or in the evening, I do not see the road, I only notice a few lampposts. (Patient 007)</i>                                                                                                                                                                                                                                                                                                                                                                                                                                                                                                 |
| <b>Serenity, hope 50%</b>      | <i>– Today I feel hopeful for the future. I try every day to accept my challenges and to live with serenity. If the situation gets worse, I know that I will have to find different ways. It will be hard, maybe even unpleasant, but it will be possible. If the situation improves, thanks to gene therapy, I will be pleased. (Patient 002)</i>                                                                                                                                                                                                                                                                                                        |
| Caregivers                     |                                                                                                                                                                                                                                                                                                                                                                                                                                                                                                                                                                                                                                                           |
| <b>Acceptance 38%</b>          | <i>– I feel I am an integral part of my son’s life. I live in symbiosis with him. Everything is more manageable: I manage to find solutions quite easily to meet his needs during his constant difficulties. Let’s say that everything is always about having an obstacle to overcome... It’s never easy, and sometimes it’s mentally exhausting. (Caregiver 003)</i>                                                                                                                                                                                                                                                                                     |
| <b>More serenity 62%</b>       | <i>– I know that we are doing our best to understand her condition better and, if possible, to start the therapy. The knowledge that we are doing our best brings me serenity. (Caregiver 005)</i>                                                                                                                                                                                                                                                                                                                                                                                                                                                        |
| Retinologists                  |                                                                                                                                                                                                                                                                                                                                                                                                                                                                                                                                                                                                                                                           |



|    |                                                                                             |
|----|---------------------------------------------------------------------------------------------|
| 1  |                                                                                             |
| 2  |                                                                                             |
| 3  |                                                                                             |
| 4  | <i>—I'm feeling comfortable. Able to do my job without hiding my human side. Open</i>       |
| 5  | <i>to questions and ready to give competent and precise answers. Willing to help but</i>    |
| 6  | <i>aware of my limits, my role, and my possibilities. (Parallel chart 006)</i>              |
| 7  | <b>Positive feelings 44%</b>                                                                |
| 8  |                                                                                             |
| 9  | <i>—I feel obliged to give him what he hasn't had so far. (Parallel chart 012)</i>          |
| 10 |                                                                                             |
| 11 | <b>Commitment 37%</b>                                                                       |
| 12 |                                                                                             |
| 13 | <i>—I realize that it is a mutual gift. It reassures me to see her grow strong and able</i> |
| 14 | <i>to face tomorrow despite her condition. I feel good with her, comforted by her</i>       |
| 15 | <i>positive attitude. (Parallel chart 010)</i>                                              |
| 16 | <b>Motivation 19%</b>                                                                       |

## VRQoL perception and daily living with RPE65-related IRDs

Supplementary file 4 presents survey data on patients' and caregivers' evaluation of RPE65-related IRDs impact on patients and their day-to-day tasks in relation to low light conditions; Figure 4 provides an overview of essential data.

[Figure 4]

Patients reported an increasing impact on main daily activities after sunset; thus, they referred both a severe impact on driving (100%) and cooking (100%), and no impact on the use of smartphones (86%) regardless of light conditions. Caregivers reported higher levels of limitation for patients in some activities even before sunset, such as reading, using digital tools or smartphones, washing, moving around; however, they reported fewer limitations in driving and cooking before sunset (100% *partially limited*). Considering an open coding of VRQoL domains in patient narratives, the limitation in activities was the prevalent issue, concerning 100% of patients' narratives. Mobility limitation (*—The city becomes more and more hostile. I am afraid of tripping, bumping into things, hurting myself, taking a wrong turn, being followed, and having to flee from a danger without being able to do so, Patient 001*), health concerns (*—I am sad and cry. I ask my mother if my eyes will ever be able to see well, Patient 007*) and emotional well-being issues (*—I cannot accept that I cannot do many things anymore, and I cannot admit that this leads me to close myself off, Patient 006*) emerged in 75% of patients' narratives.

Nevertheless, further survey data showed that 72% of patients considered their VRQoL good, and 14% excellent (Figure 5); thus, they reported that RPE65-related IRDs have enough impact on the

1  
2  
3  
4  
5  
6  
7  
8  
9  
10  
11  
12  
13  
14  
15  
16  
17  
18  
19  
20  
21  
22  
23  
24  
25  
26  
27  
28  
29  
30  
31  
32  
33  
34  
35  
36  
37  
38  
39  
40  
41  
42  
43  
44  
45  
46  
47  
48  
49  
50  
51  
52  
53  
54  
55  
56  
57  
58  
59  
60

255 performance of their daily activities (83%). Fifty percent of caregivers defined their patient's VRQoL  
256 acceptable, and only 38% good; conversely, 30% and 14% reported that RPE65-related IRDs have a  
257 low – or no – impact on patients' performance of daily activities, respectively.

258 [Figure 5]

259 Addressing future perspectives, 71% of patients reported their hope to live serenely, both within  
260 their family and in the social context (*–I just want my loved ones to see me calm and serene. [...] I*  
261 *could not bear to see my relatives feeling bad for me, Patient 006*), and 29% their hope to receive  
262 gene therapy (*–Thinking about tomorrow, I would like to receive gene therapy, Patient 002*);  
263 caregivers also stated to await gene therapy (50%). Clinicians hope to maintain a high quality of care  
264 in 41% of parallel charts, to improve their interpersonal skills and therapeutic possibilities for  
265 patients in 37%, and to be able to give them real hope in 22% (*–Sometimes I think that gene therapy*  
266 *has already become a reality, and I feel that I am living a surreal experience. [...] I wish that what I*  
267 *perceive as surreal today soon becomes reality, Parallel chart 007*).

268 Overall, participants described writing as a positive experience: 27% of the caregivers' narratives  
269 and 21% of the parallel charts reported to consider it useful to raise awareness about these  
270 conditions; however, they also highlighted negative feelings, such as fatigue or sadness, in 14% and  
271 8% of cases, respectively.

### 272 **Insights from in-depth interviews**

273 Five macro-themes transversely emerged from the in-depth interviews with MDT professionals and  
274 PA member (Table 5):

- 275 (a) The O&M instructor described the gap occurring between early-onset patients, who can  
276 develop compensatory strategies over time, and adult-onset patients, more likely to lose  
277 their previous visual experience. Thus, early-onset patients may experience their sight as  
278 “normal”; in this sense, the psychologists highlighted the importance to psychologically

1

2

3 279

support patients upon the communication of the clinical diagnosis, when introducing the

4

5 280

notion of “impairment”.

7

8 281

(b) According to all interviewees, psychological support should be provided throughout the care

9

10 282

pathway to improve communication and avoid misleading messages that could make

12

13 283

patients feel that they “could do nothing more”. Furthermore, as also maintained by the

14

15 284

genetic counselors and the PA member, a more careful communication would allow the

17

18 285

patient to keep an active perspective on the care pathway and early address rehabilitation

19

20 286

programs.

21

22

23 287

(c) All interviewees addressed the RPE65-related IRDs impact on parental and partner

24

25 288

caregivers. While the latter may face a couple crisis due to the progression of the

26

27 289

impairment, the former often deal with the failure of the “perfect child” dream, the hope

29

30 290

that they children will heal and a strong sense of guilt for the inheritability of the condition.

31

32 291

Since caregivers project these complex feelings on patients, potentially impacting their care

33

34

35 292

pathway, a psychological support should be provided to help them accept this condition.

36

37 293

(d) All interviewees highlighted the lack of knowledge of IRDs among the general public and

38

39

40 294

society. The O&M instructor stressed that the link between visual impairment and changing

41

42 295

light conditions is challenging for those who do not know these diseases. The psychologists

43

44

45 296

confirmed that this is also critical in the school environment. One psychologist and the PA

46

47 297

member mentioned the need to create an IRDs “culture” and to address the diversity issue.

48

49

50 298

(e) Furthermore, one psychologist focused on the need for investigation tools integrating

51

52 299

quantitative questionnaires to address the interpersonal dimension of daily activities,

53

54 300

especially after sunset or in low light conditions.

56

57

58

59

60

**Table 5 – Macro-themes reported by MT professionals and PA representative interviewed:  
quotes from in-depth interviews**

**Managing IRDs**

– *In some people, the degenerative process begins during adulthood. They “unconsciously” erase all their previous visual experiences: it’s a psychological reaction to the condition. Thus, they really need a “carer” because they can no longer do anything.*

|                                                     |                                                                                                                                                                                                                                                                                                                                                                                                                                                                                                                                                                                                                                                                                                                                                                                                                                                                                                                                                                                                                                                                                                                                                                              |
|-----------------------------------------------------|------------------------------------------------------------------------------------------------------------------------------------------------------------------------------------------------------------------------------------------------------------------------------------------------------------------------------------------------------------------------------------------------------------------------------------------------------------------------------------------------------------------------------------------------------------------------------------------------------------------------------------------------------------------------------------------------------------------------------------------------------------------------------------------------------------------------------------------------------------------------------------------------------------------------------------------------------------------------------------------------------------------------------------------------------------------------------------------------------------------------------------------------------------------------------|
|                                                     | <i>Their mind forgets and cannot retrieve all the skills they possessed before from their store of experiences. On the other hand, in children who are used to this type of vision from an early age, visual function adapts, even if it gradually diminishes. They can create compensatory strategies more quickly, even if, while working on it, we realize that their visual acuity or visual field have worsened. (Interviewee 002)</i>                                                                                                                                                                                                                                                                                                                                                                                                                                                                                                                                                                                                                                                                                                                                  |
| <b>Communication of the diagnosis</b>               | <p>– [...] Colleagues who are not familiar with this condition are sometimes caught off guard. In the past, there have been communication issues. [...] Over the years, I have seen everything: from diagnoses not being communicated even when clear and evident, to children being told to learn Braille. Sometimes prognoses were communicated incorrectly; patients perceived them as crude, or they were told not to have children, because they would all be suffering from the same condition. (Interviewee 001)</p> <p>– We still have situations where the diagnosis is communicated violently: unfortunately, there is no cure for the disease, blindness could occur, but we do not know when... Verbal violence is where any kind of hope is taken away. [...] The main issue after the diagnosis is the psychological one. Suppose the diagnosis is communicated together with the possibility of recuperation, in which case one can deal with it somehow; but if it is expressed without this possibility, people don't even undergo check-ups anymore. (Interviewee 004)</p>                                                                                 |
| <b>Attention to partner and parental caregivers</b> | <p>– Some couples, [...] when they discovered the condition experienced a crisis. [...] What I noticed is that the way a caregiver treats his/her partner changes a lot: It's more imperative (Interviewee 002)</p> <p>– A parent cannot serenely accept the condition of a child. Mothers are confronted with this issue daily, i.e., they are considered "good mothers" if they can accept it, and this translates into the thought "I am not a good mother, I will not be a good mother". [...] These parents often call the child "sick". Disability is not a disease, but a condition. In pregnancy, parents expect to have a "healthy" child: the hope is to regain this healthy child, even when it is objectively impossible. (Interviewee 003)</p>                                                                                                                                                                                                                                                                                                                                                                                                                  |
| <b>Lack of knowledge of IRDs</b>                    | <p>– In terms of daily life, people with this condition experience uncertainty, which is not even daily, but hourly. They may not see the same things at 10:00 and 10:30 am, because of a series of parameters that come into play: size, permanence, brightness, which give the retina a different visual function. So, this uncertainty generates other insecurities, and often triggers profound depressive states. This is not understood by other people. Often, at school, teachers do not understand how the child could see the blackboard at the beginning of the lesson and not at the end. The explanation is evident to those who know these disorders: maybe the sun's angle had changed, of fatigue may come in to play, together with a series of parameters that determine a visual loss. (Interviewee 002)</p> <p>– I believe that initiatives are needed to allow people gain experience. For children, we could think of initiatives in school, which should be carried out regardless of the presence in the class of a child with this condition. We need to create a "culture" [...], a culture of confrontation with diversity. (Interviewee 003)</p> |
| <b>New investigation tools</b>                      | – The dimension of being with others is entirely missing: all activities are investigated as if they were carried out by the person alone, but rarely people with this condition are alone, especially after sunset. (Interviewee 003)                                                                                                                                                                                                                                                                                                                                                                                                                                                                                                                                                                                                                                                                                                                                                                                                                                                                                                                                       |

## DISCUSSION

The project represents the first effort to investigate RPE65-related IRDs in Italy through NM, simultaneously addressing the perspectives of patients, caregivers and treating retinologists and collecting insights from MDT professionals and PA members.

1  
2  
3 306 The co-presence of *illness*- and *sickness*-related aspects [23] and the lack of a clinical language in  
4  
5  
6 307 patient narratives highlighted the centrality of the personal and social dimensions of living with an  
7  
8 308 RPE65-related IRD in narrating the illness experience and trying to make sense [10] of the condition;  
9  
10  
11 309 the prevalence of moral narratives [39] supports this suggestion. The employed classifications  
12  
13 310 allowed related themes to emerge in narratives spontaneously: patients declared to have  
14  
15 311 manifested the first signs of visual impairment during early childhood and reported a discomfort  
16  
17  
18 312 mainly due to the informal testing they were subjected to by their parents, together with repeated  
19  
20 313 eye examinations, before the clinical diagnosis; at school, their visual impairment is misunderstood  
21  
22  
23 314 or questioned by their teachers, who are not aware of the relationship between visual impairment  
24  
25 315 and changing light conditions. In-depth interviews confirm the lack of knowledge about IRDs among  
26  
27  
28 316 the general public and society, as well as at school, where patients also experience stigma [41] since  
29  
30 317 their visual issues are addressed like cognitive impairments. Further investigations on the school  
31  
32  
33 318 environment may integrate studies on the patients' discrimination at their workplace [42] and  
34  
35 319 studies on the patients' feeling of being often patronised [10].  
36  
37 320 Early-onset patients perceive their sight as "normal", finding out to be "impaired" only after the  
38  
39  
40 321 clinical diagnosis or by interacting with their peers in the school environment. As emerged from the  
41  
42 322 in-depth interviews, the notion of "impairment" should be carefully introduced to support the  
43  
44  
45 323 patients' awareness of their condition. This issue may be further explored and integrated with  
46  
47 324 studies on making sense and coping with IRDs [10, 12], while careful communication should be  
48  
49  
50 325 adopted throughout the care pathways.  
51  
52 326 The search for autonomy emerges as related to the health concerns for the progressive sight loss  
53  
54  
55 327 and the emotional well-being issues showing anxiety for the future. Findings confirm that RPE65-  
56  
57 328 related IRDs significantly impact patients' VRQoL in terms of activity and mobility limitations: while  
58  
59 329 changing light conditions do not change the use of digital tools or smartphones, activities such as  
60

1  
2  
3  
4  
5  
6  
7  
8  
9  
10  
11  
12  
13  
14  
15  
16  
17  
18  
19  
20  
21  
22  
23  
24  
25  
26  
27  
28  
29  
30  
31  
32  
33  
34  
35  
36  
37  
38  
39  
40  
41  
42  
43  
44  
45  
46  
47  
48  
49  
50  
51  
52  
53  
54  
55  
56  
57  
58  
59  
60

330 driving and cooking remain challenging, regardless of the light conditions; moreover, the capability  
331 to perform daily activities is compromised by low light conditions, as also shown in studies  
332 addressing IRD critical effects on lifestyle choices [11, 43]. Nonetheless, many patients reported  
333 having a good VRQoL, suggesting that they have found strategies to cope with the condition in the  
334 absence, so far, of a therapeutic solution; these coping strategies should be further investigated.  
335 Also, two considerations may be emphasised: on the one side, the narratives and survey data show  
336 misalignment between the patient's and the caregiver's perception of the former's limitation in  
337 activities and in VRQoL, where patients report a higher perceived VRQoL, and conversely a lower  
338 performance while carrying out daily tasks. On the other side, the search for autonomy is linked  
339 with the perception that relying on others is a limitation, confirming previous studies on this topic  
340 [11].  
341 The metaphors used by patients to describe RPE65-related IRDs highlight not only limitations and  
342 pain, but also lights and hope. Conversely, the association with images recalling darkness emerges  
343 from caregiver narratives and parallel charts; in particular, caregivers do not use any positive image  
344 to describe RPE65-related IRDs.  
345 In contrast with patients, caregiver narratives largely focus on *disease*-related aspects [23];  
346 however, the presence of *sickness*- and *illness*-related aspects suggests their emotional  
347 commitment to the patient's well-being. Furthermore, moral narratives [39] reveal the sense of guilt  
348 experienced by caregivers about the hereditariness of the condition, which is also addressed within  
349 in-depth interviews: while partner caregivers may face a couple crisis upon the onset of the  
350 condition, parental caregivers experience the failure of the "perfect child" dream and struggle to  
351 accept the condition. Misalignment in the patients' perception of their VRQoL, metaphors, and the  
352 emotional issues reported also suggest the complexity found by caregivers in coping with these  
353 conditions.

1  
2  
3 354 Parallel charts show that retinologists are personally and emotionally involved in the care  
4  
5  
6 355 relationship, as suggested by the prevalence of core narratives [39] and reported their feelings at  
7  
8 356 the beginning of the care pathway, despite being less focused on social RPE65-related IRDs aspects.  
9  
10  
11 357 Retinologists emerge as being motivated to find the most suitable therapeutic pathway, as well as  
12  
13 358 emotionally committed to patients; for the first time in similar NM projects, clinicians report a clear  
14  
15 359 sense of guilt for being “healthy” compared to their patients.

16  
17  
18 360 These are only preliminary findings; however, they can provide initial insights on the importance of  
19  
20 361 a multidisciplinary RPE65-related IRDs clinical practice:

21  
22  
23 362 (a) RPE65-related IRDs critically impact several quality-of-life domains, while the emotional  
24  
25 363 aspects of RPE65-related IRDs emerge as crucial while making sense of the condition and  
26  
27  
28 364 during the clinical encounter: the tension between the individual and the social dimensions  
29  
30 365 of these conditions emerged as informative of the care pathway challenges and real-life  
31  
32  
33 366 experiences, and may be better addressed through new investigation tools, as claimed by  
34  
35 367 the in-depth interviews. The NM approach has proved to be suitable for this purpose.

36  
37 368 (b) The emotional burden of caregiving remains poorly investigated. Nonetheless, narratives  
38  
39  
40 369 show that caregivers deeply participate in the patient’s illness experience, while the in-depth  
41  
42 370 interviews recommend a psychological support to help them accept the condition, while  
43  
44  
45 371 potentially improving the care pathway.

46  
47 372 (c) The need for an RPE65-related IRDs “culture” emerges as crucial to acknowledge these  
48  
49  
50 373 conditions, to avoid perpetuating the stigma and the scepticism and to foster the debate on  
51  
52 374 diversity at society level.

53  
54 375 Since narratives were anonymous, we are not able to precisely state the misalignment between  
55  
56  
57 376 patients and caregivers regarding the performance of daily activities and the perception of VRQoL.

58  
59 377 Further investigations are needed to examine in more details the issues which spontaneously  
60

1  
2  
3 378 emerged, also involving the work sphere. The annual incidence of RPE65-related IRDs explains the  
4  
5  
6 379 low number of participating patients [44]; however, the narratives collected suggest a strong  
7  
8 380 dedication to the project and a relationship of trust between patients, caregivers and the  
9  
10  
11 381 retinologists from the centres involved. Finally, the data collection phase partially coincided with  
12  
13 382 the local measures decided by the Italian government to contain the Sars-Cov-2 pandemic, with  
14  
15 383 consequences on the clinical follow-up and the participation in the project.

## 17 384 **CONCLUSION**

19  
20 385 The project investigated the practical and emotional issues of RPE65-related IRDs as experienced by  
21  
22  
23 386 patients, caregivers, and retinologists, and provided insights from MDT professionals and PA  
24  
25 387 members. It represented the first Italian project that simultaneously addresses and integrates these  
26  
27  
28 388 perspectives, whose comparison allowed to provide preliminary suggestions useful for the clinical  
29  
30 389 practice and the knowledge of RPE65-related IRDs. NM allowed to connect the impact of RPE65-  
31  
32  
33 390 related IRDs on quality-of-life domains with real-life experiences, emerging as informative in raising  
34  
35 391 suggestions to improve the care pathway for these conditions.

## 36 37 392 **Abbreviations**

38  
39  
40 393 IRDs – Inherited Retinal Disorders

41  
42 394 RPE65 – Retinal pigment epithelium-specific 65 kDa protein

43  
44  
45 395 LCA – Leber congenital amaurosis

46  
47 396 RP – Retinitis Pigmentosa

48  
49  
50 397 VRQoL – Vision-Related Quality of Life

51  
52 398 WHO – World Health Organization

53  
54 399 NM – Narrative Medicine

55  
56  
57 400 MDTs – Multidisciplinary teams

58  
59 401 PA – Patient Association

60



1  
2  
3  
4  
5  
6  
7  
8  
9  
10  
11  
12  
13  
14  
15  
16  
17  
18  
19  
20  
21  
22  
23  
24  
25  
26  
27  
28  
29  
30  
31  
32  
33  
34  
35  
36  
37  
38  
39  
40  
41  
42  
43  
44  
45  
46  
47  
48  
49  
50  
51  
52  
53  
54  
55  
56  
57  
58  
59  
60

402 WCAG – Web Content Accessibility Guidelines

403 SRQR – Standards for Reporting Qualitative Research

## 404 **DECLARATIONS**

### 405 **Ethics approval**

406 The project was conducted according to the Declaration of Helsinki. The Ethical Committee of the  
407 Luigi Vanvitelli University Hospital (Naples, Italy) approved the project rationale, design,  
408 investigation questionnaires and informed consent in September 2020 (protocol ID 20964/2020).

### 409 **Consent to participate**

410 Participants provided a web-based informed consent before their involvement and after being  
411 briefed on the purposes of the research and the procedures for the processing of personal data,  
412 according to General Data Protection Regulation of the European Union 2016/679 and the Italian  
413 Law 196/2003. The clinicians involved obtained a written informed consent to participate from the  
414 parents of underage patients during the first briefing on the project's methods and purposes.

### 415 **Consent for publication**

416 Not applicable.

### 417 **Data sharing**

418 All datasets used and analyzed during the current research are available in Italian from the  
419 corresponding author, upon reasonable request.

### 420 **Competing interests**

421 MA and NF are employees of Novartis Pharmaceuticals, Italy, and Region Europe. FS, BF, GB, and GI  
422 have received honoraria from Novartis Pharmaceuticals, Italy, for holding webinars. FS, AS, IP, IDR  
423 have received honoraria from Novartis Pharmaceuticals, Italy, for serving on advisory boards.

### 424 **Funding**

425 Novartis Farma unconditionally supported ISTUD Foundation for the realisation of the project.

1  
2  
3  
4  
5  
6  
7  
8  
9  
10  
11  
12  
13  
14  
15  
16  
17  
18  
19  
20  
21  
22  
23  
24  
25  
26  
27  
28  
29  
30  
31  
32  
33  
34  
35  
36  
37  
38  
39  
40  
41  
42  
43  
44  
45  
46  
47  
48  
49  
50  
51  
52  
53  
54  
55  
56  
57  
58  
59  
60

## 426 **Authors' contributions**

427 FS, AS, BF, GB, GI, AA, LR, NF and MA were involved in the project's conceptualization. MGM, LR,  
428 and AF were involved in the methodology. FS, AS, BF, GB, GI, VDI, DG, GP, AA, GBV, AC, SDS, IDR, SF,  
429 CM, DPM, VM, IP and ST contributed to the project's investigation. RL and MA were involved in the  
430 project's administration. LR and AF contributed to data analysis. FS, AS, BF, GI, VDI, DG, GP, AA, LR  
431 and MA contributed to data validation. AF, LR and MA were involved in writing; all authors  
432 contributed to the manuscript review and read and approved the final draft for submission.

## 433 **Acknowledgements**

434 The authors wish to thank Novartis Farma Italia that sponsored and funded this work, especially  
435 Vincenza Vinaccia for her editorial assistance. The authors would also thank Paolo Melillo from  
436 Vanvitelli University Hospital for the support provided for the Ethical Committee's approval of the  
437 project, as well as the researchers of Healthcare Area of ISTUD Foundation for their useful role  
438 throughout the project, as well as all the people suffering from an RPE65-related IRD, their  
439 caregivers, the healthcare professionals and the Patient Association representatives who took part  
440 in the research.

## 441 **References**

- 442 1. Broadgate S, Yu J, Downes SM, Halford S. Unravelling the genetics of inherited retinal  
443 dystrophies: Past, present and future. *Progress in Retinal and Eye Research*. 2017; 59.
- 444 2. Ziccardi L, Cordeddu V, Gaddini L, Matteucci A, Parravano M, Malchiodi-Albedi F, et al. Gene  
445 therapy in Retinal Dystrophies. *In J Mol Sci*. 2019 Nov 14; 20(22).
- 446 3. Kang C, Scoo LJ. Voretigene Neparvovec: A Review in RPE65 Mutation-Associated Inherited  
447 Retinal Dystrophy. *Mol Diagn Ther*. 2020 Aug; 24(4).
- 448 4. Duncan JL, Pierce A, Laster AM, Daiger SP, Birch DG, Ash JD, et al. Inherited retinal  
449 degenerations: Current landscape and knowledge gaps. *Transl Vis Sci Technol*. 2018;7.
- 450 5. Tsang SH, Sharma T. Leber Congenital Amaurosis. *Adv Exp Med Biol*. 2018; 1085.
- 451 6. Tsang SH, Sharma T. Retinitis Pigmentosa (Non-syndromic). *Adv Exp Med Biol*. 2018; 1085.

1

2

3 452

4

5 453

6

7 454

8

9 455

10

11 456

12 457

13

14 458

15

16 459

17

18 460

19

20 461

21

22 462

23 463

24

25 464

26

27 465

28

29 466

30

31 467

32

33 468

34 469

35

36 470

37

38 471

39

40 472

41

42 473

43

44 474

45 475

46

47 476

48

49 477

50

51 478

52

53 479

54

55 480

56 481

57

58 482

59

60 483

7. Jacobson SG, Aleman Ts, Cideciyan AV, Roman AJ, Sumaroka A, Windsor EA, et al. Defining the residual vision in Leber congenital amaurosis caused by RPE65 mutations. *Invest Ophthalmol Vis Sci*. 2009 May; 50(5).
8. Russell S, Bennet J, Wellman JA, Chung DC, Yu ZF, Tillman A, et al. Efficacy and safety of voretigene neparvovec (AAV2-hRPE65v2) in patients with RPE65-mediated inherited retinal dystrophy: a randomised, controlled, open-label, phase 3 trial. *Lancet*. 2017 Aug 26;390(10097).
9. Thompson DA, Ali RR, Banin E, Branham KE, Flannery JG, Gamm DM, et al. Advancing therapeutic strategies for inherited retinal degeneration: recommendations from the Monaciano Symposium. *Invest Ophthalmol Vis Sci*. 2015;56(2).
10. Thurston M, Thurston A, McLeod J. Socio-emotional effects of the transition from sight to blindness. *British Journal of Visual Impairment*. 2010; 28(2).
11. Prem Senthil MP, Khadka J, Pesudovs K. Seeing through their eyes: lived experiences of people with retinitis pigmentosa. *Eye*. 2017;31(5).
12. Bittner AK, Edwards L, George M. Coping strategies to manage stress related to vision loss and fluctuations in retinitis pigmentosa. *Optometry*. 2010; 81(9).
13. Lloyd A, Piglowska N, Ciulla T, Pitluck S, Johnson S, Buessing M, et al. Estimation of impact of RPE65-mediated inherited retinal disease on quality of life and the potential benefits of gene therapy. *Br J Ophthalmol*. 2019 Nov;103(11).
14. Chacón-López H, Pelayo FJ, López-Justicia MD, Morillas CA, Urena R, Chacon-Medina A, Pino B. Visual training and emotional state of people with retinitis pigmentosa. *J Rehabil Res Dev*. 2013;50.
15. Kempen GI, Ranchor AV, Ambergen T, Zijlstra GR. The mediating role of disability and social support in the association between low vision and depressive symptoms in older adults. *Qual Life Res*. 2014; 23(3).
16. Parmeggiani F, Sato G, De Nadai K, Romano MR, Binotto A, Costagliola C. Clinical and Rehabilitative Management of Retinitis Pigmentosa: Up-to-Date. *Curr Genomics*. 2011 Jun;12(4).
17. Garip G, Kamal A. Systematic review and meta-synthesis of coping with retinitis pigmentosa: implications for improving quality of life. *BMC Ophthalmology* (2019) 19.
18. Pierret J. The illness experience: state of knowledge and perspectives for research. *Sociol Health Illn*. 2003; 25.

- 1  
2  
3 484 19. Greenhalgh T. Cultural contexts of health: the use of narrative research in the health sector.  
4  
5 485 Copenhagen: WHO Regional Office for Europe; 2016, Health Evidence Network (HEN)  
6  
7 486 synthesis report 49. [http://www.euro.who.int/](http://www.euro.who.int/__data/assets/pdf_file/0004/317623/HEN-)  
8  
9 487 [synthesis-report-49.pdf](http://www.euro.who.int/__data/assets/pdf_file/0004/317623/HEN-synthesis-report-49.pdf), last accessed on March 23, 2021.
- 10  
11 488 20. Nowaczyk MJ. Narrative medicine in clinical genetics practice. *Am J Med Genet A.* 2012  
12 489 Aug;158A(8).
- 13  
14 490 21. Ragusa L, Crinò A, Grugni G, Reale L, Fiorencis A, Licenziati MR. Caring and living with Prader-  
15  
16 491 Willi syndrome in Italy: integrating children, adults and parents' experiences through a  
17  
18 492 multicenter narrative medicine research. *BMJ Open* 2020;10.
- 19  
20 493 22. Marini MG. *Narrative Medicine: Bridging the Gap between Evidence-based Care and Medical*  
21  
22 494 *Humanities*. London: Springer International Publishing 2016.
- 23  
24 495 23. Kleinman A. *The Illness Narrative, Suffering and Healing the Human Condition*. New York:  
25 496 Basic Book 1989.
- 26  
27 497 24. Greenhalgh T, Hurwitz B. Why study narrative? *BMJ* 1999; 318.
- 28  
29 498 25. Marini MG, *Languages of Care in Narrative Medicine. Words, Space and Time in the*  
30  
31 499 *Healthcare Ecosystem*. London: Springer International Publishing 2019.
- 32  
33 500 26. Fioretti C, Mazzocco K, Riva S, Oliveri S, Masiero M, Pravettoni G. Research studies on  
34 501 patients' illness experience using the Narrative Medicine approach: a systematic review. *BMJ*  
35  
36 502 *Open* 2016; 6.
- 37  
38 503 27. Simonelli F, Sodi A, Falsini B, et al. Care pathway of RPE65-related inherited retinal disorders  
39  
40 504 from early symptoms to genetic counseling: a multicenter Narrative Medicine project in  
41  
42 505 Italy. *Clinical Ophthalmology*. In Press, 2021.
- 43  
44 506 28. Audo I, Williamson N, Bradley H, Barclay M, Sims J, Arbuckle R, et al. Qualitative exploration  
45 507 of patient and caregiver experiences of visual function impairments and impacts on vision-  
46  
47 508 dependent activities of daily living and health-related quality of life associated with Retinitis  
48  
49 509 Pigmentosa and Leber Congenital Amaurosis in Germany and France. *Invest. Ophthalmol.*  
50  
51 510 *Vis. Sci.* 2021;62(8):3585.
- 52  
53 511 29. Kay C, Williamson N, Bradley H, Barclay M, Sims J, Arbuckle R, et al. Qualitative interviews  
54 512 with patients and caregivers regarding visual function impairments and impacts on vision-  
55  
56 513 dependent activities of daily living and health-related quality of life in RPE65-related Retinitis  
57  
58 514 Pigmentosa and Leber Congenital Amaurosis. *Invest. Ophthalmol. Vis. Sci.* 2021;62(8):3589.
- 59  
60

- 1  
2  
3 515 30. Web Content Accessibility Guidelines (WCAG) 2.1. W3C Recommendations 05 June 2018.  
4 Available at <https://www.w3.org/TR/WCAG21/>, last accessed March 23, 2021.  
5 516  
6  
7 517 31. Reid K, Soundy A. A qualitative study examining the illness narrative master plots of people  
8 with head and neck cancer. *Behav Sci* 2019; 9.  
9 518  
10  
11 519 32. Peeters B, Marini M. Narrative medicine across languages and cultures: using minimal  
12 English for increased comparability of patients' narratives. In: Goddard C, ed. *Minimal*  
13 *English for a Global World: Improved Communication Using Fewer Words*. Basingstoke, UK:  
14 Palgrave Macmillan 2018: 259–86.  
15 521  
16 522  
17  
18 523 33. Charon R. The patient-physician relationship. *Narrative Medicine: a model for empathy,*  
19 *reflection, profession, and trust. JAMA* 2001; 286.  
20 524  
21  
22 525 34. Banfi P, Cappuccio A, Latella ME, et al. Narrative medicine to improve the management and  
23 quality of life of patients with COPD: the first experience applying parallel chart in Italy. *Int J*  
24 *Chron Obstruct Pulmon Dis* 2018; 13.  
25 527  
26  
27 528 35. Brédart A, Marrel A, Abetz-Webb L, Lasch K, Acquadro C. Interviewing to develop Patient-  
28 Reported Outcome (PRO) measures for clinical research: eliciting patients' experience.  
29 529 *Health Qual Life Outcomes*. 2014 Feb 5.  
30 530  
31  
32 531 36. Regulation (EU) 2016/679 of the European Parliament and of the Council of 27 April 2016 on  
33 the protection of natural persons with regard to the processing of personal data and on the  
34 free movement of such data and repealing Directive 95/46/EC (General Data Protection  
35 Regulation. Published on the Official Journal of the European Union L 119, May 4, 2016.  
36 533 <https://eur-lex.europa.eu/legal-content/EN/TXT/PDF/?uri=CELEX:32016R0679>,  
37 last  
38 534 accessed on March 23, 2021.  
39  
40 535  
41  
42 536  
43 537 37. Personal data code protection. Legislat. Decree no. 196 of 30 June 2003. Published on the  
44 Italian Official Journal n. 174, July 29, 2003, Supplementary n. 123.  
45 538 <https://www.camera.it/parlam/leggi/deleghe/Testi/03196dl.htm>,  
46 last  
47 539 accessed on March  
48 23, 2021.  
49 540  
50  
51 541 38. Bazeley P, Jackson K. *Qualitative Data Analysis with NVivo*. London: SAGE 2013.  
52  
53 542 39. Bury M. Illness narratives: fact or fiction? *Sociology of Health and Illness*. 2001;23(3).  
54 543  
55 544 40. Tong A, Sainsbury P, Craig J. Consolidated criteria for reporting qualitative research  
56 (COREQ): a 32-item checklist for interviews and focus groups. *Int J Qual Health Care*. 2007  
57 Dec;19(6).  
58 545  
59  
60 546 41. Goffman E. *Stigma*. London: Penguin, 1963.

- 1  
2  
3 547 42. Spiegel T, De Bel V, Steverink N. Keeping up appearances: the role of identity concealment  
4  
5 548 in the workplace among adults with degenerative eye conditions and its relationship with  
6  
7 549 wellbeing and career outcomes. *Disabil Rehabil.* 2016;38(7)  
8  
9 550 43. Prem Senthil M, Khadka J, Gilhotra JS, Simon S, Pesudovs K. Exploring the quality of life  
10  
11 551 issues in people with retinal diseases: a qualitative study. *J Patient Rep Outcomes.*  
12  
13 552 2017;1(1).  
14 553 44. Lorenz B, Tavares J, van den Born LI, Marques JP, Scholl HPN; EVICR.net Group. Current  
15  
16 554 management of patients with RPE65 mutation-associated inherited retinal degenerations  
17  
18 555 (IRDs) in Europe. Results of a multinational survey by the European Vision Institute Clinical  
19  
20 556 Research Network EVICR.net. *Ophthalmic Res.* 2021 Mar 8.

## 21 22 557 **Figure legend**

23  
24 558 Figure 1 – Kleinman’s classification: distribution and quotes from narratives.

25  
26  
27 559 Figure 2 – Bury’s classification: distribution and quotes from narratives.

28  
29 560 Figure 3 – Metaphors used to describe RPE65-related IRDs: distribution and examples.

30  
31  
32 561 Figure 4 – Reported limitations in activities by patients and caregivers: essential data.

33  
34 562 Figure 5 – Patients’ QoL and RPE65-related IRDs overall interference on activities as perceived by  
35  
36  
37 563 patients and caregivers.

Figure 1 — Kleinman's classification: distribution and quotes from narratives

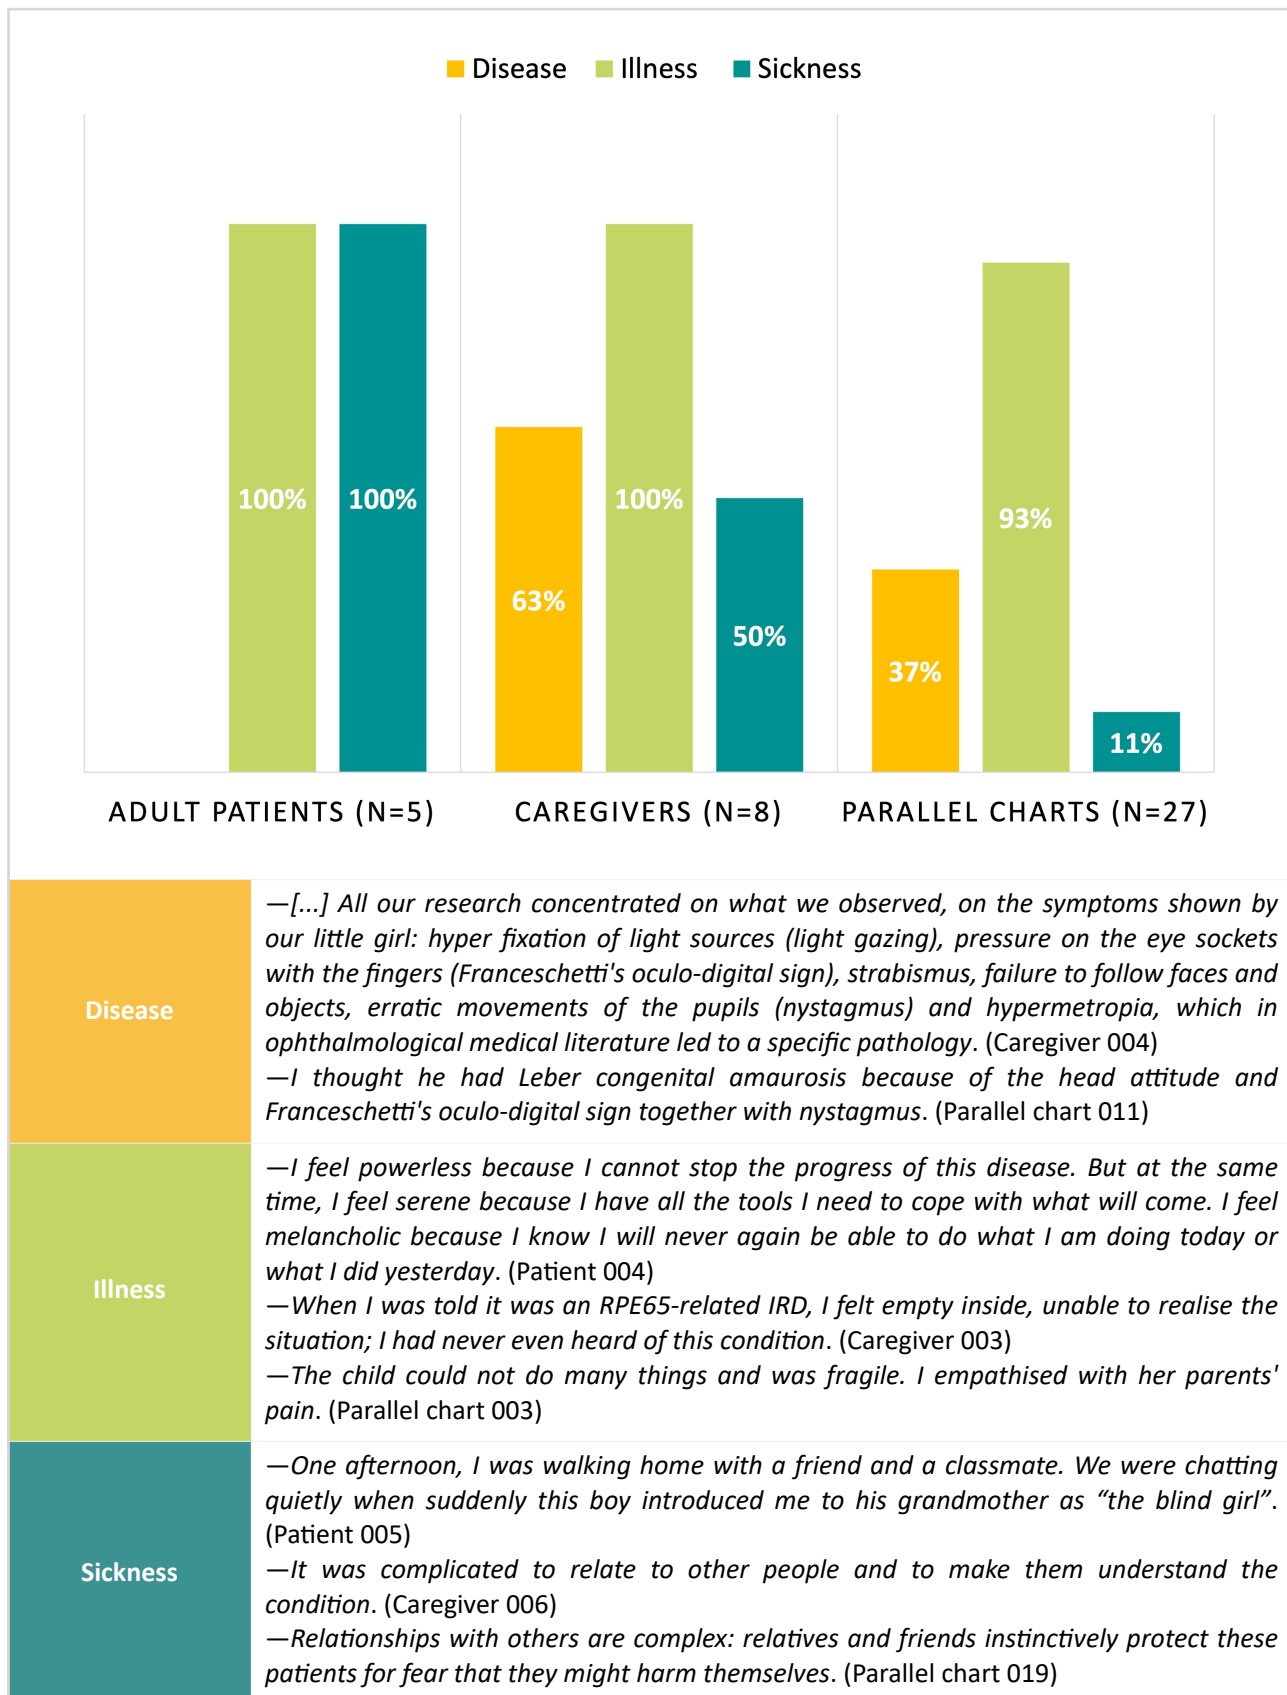

Figure 2 — Bury’s classification: distribution and quotes from narratives

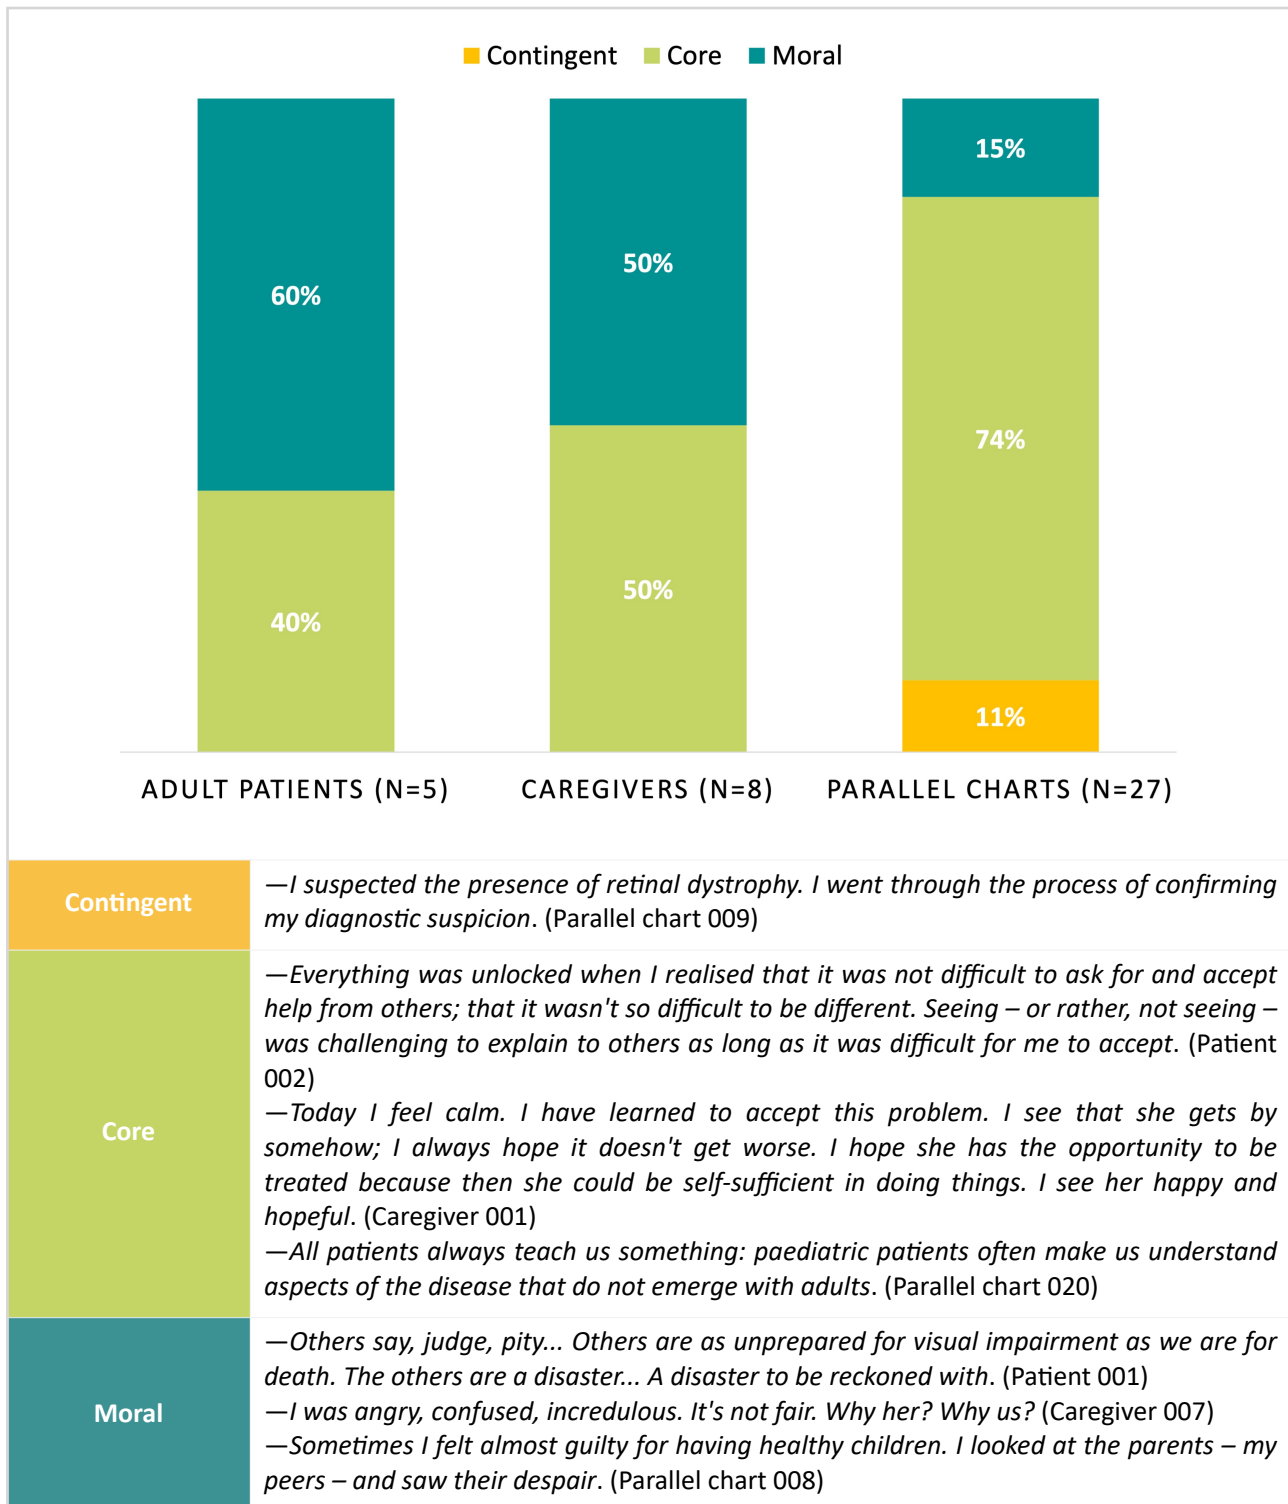



**Figure 3 - Metaphors used to describe RPE65-related IRDs: distribution and examples**

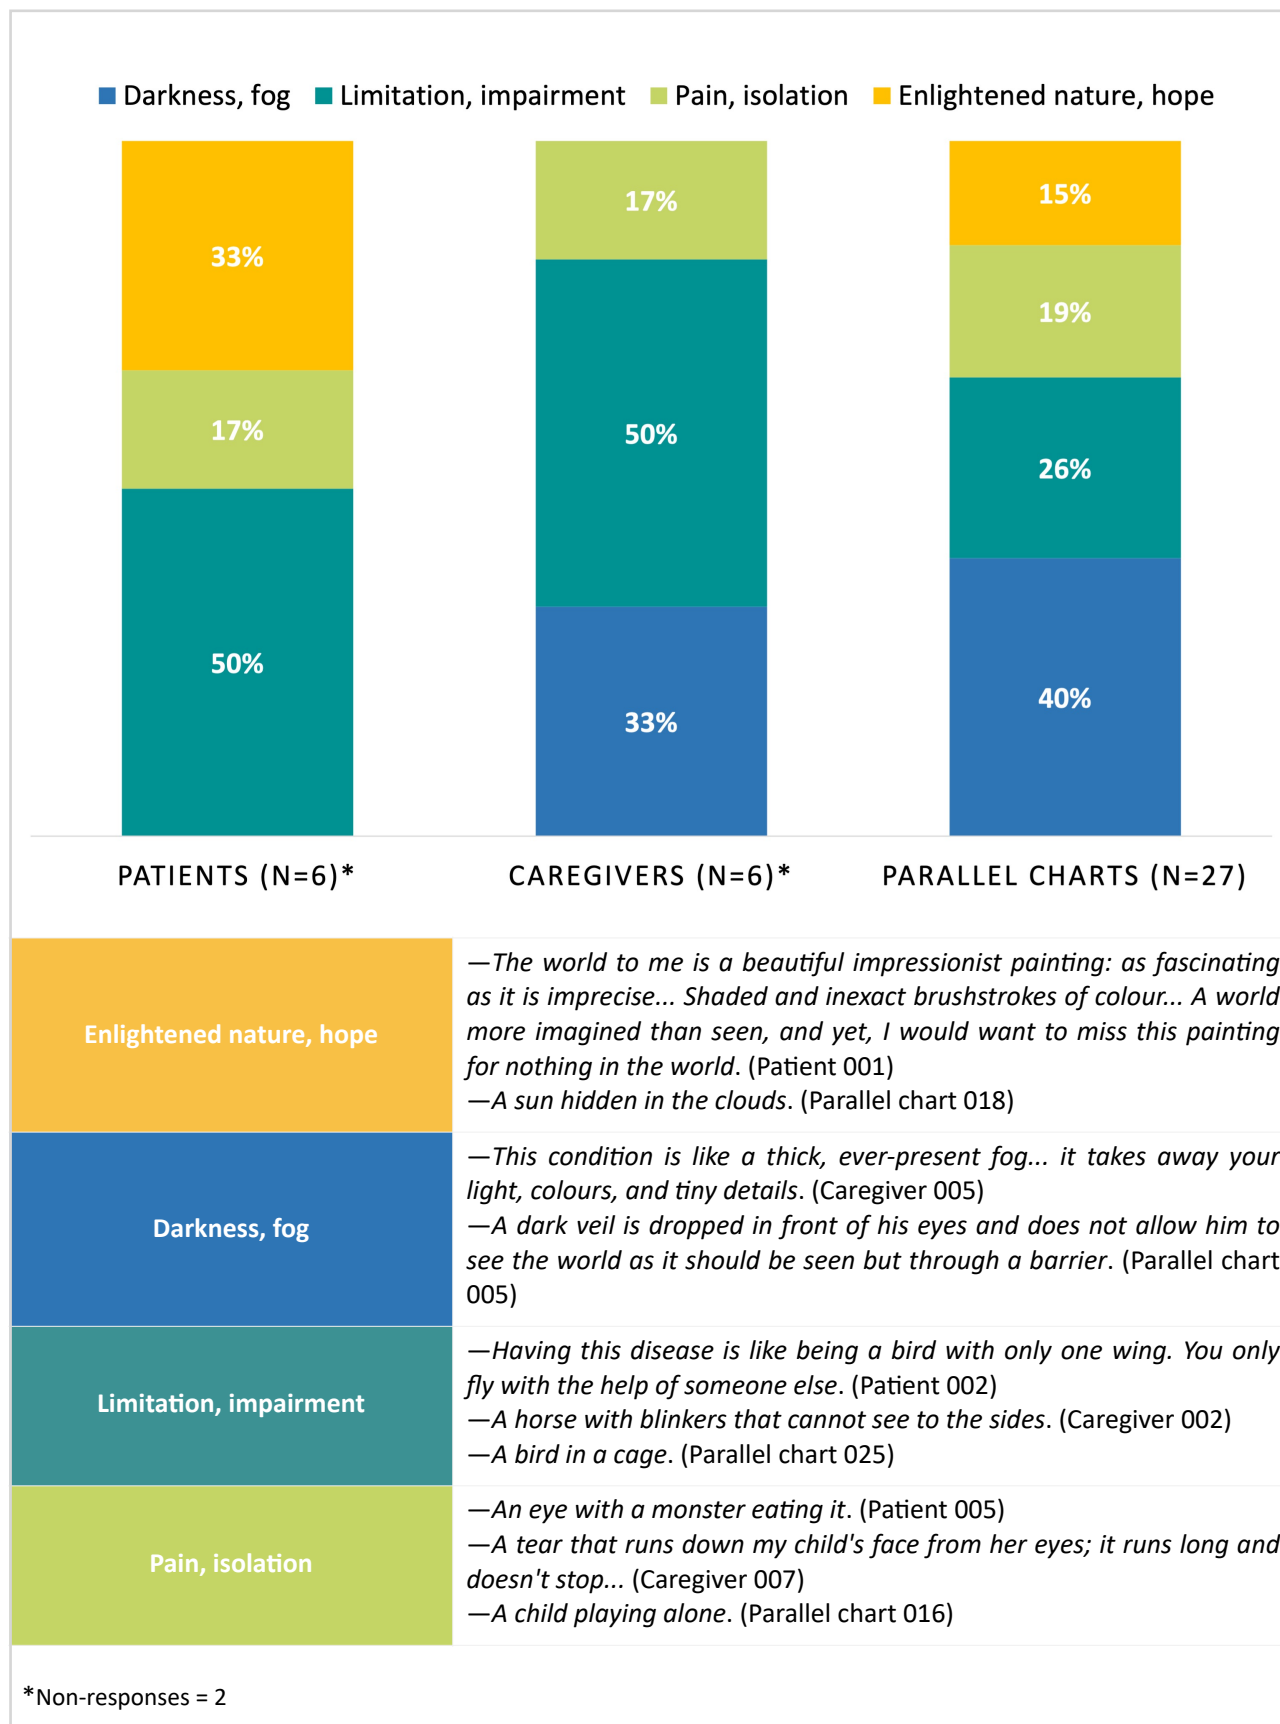

Figure 4 - Reported limitations in activities by patients and caregivers: essential data

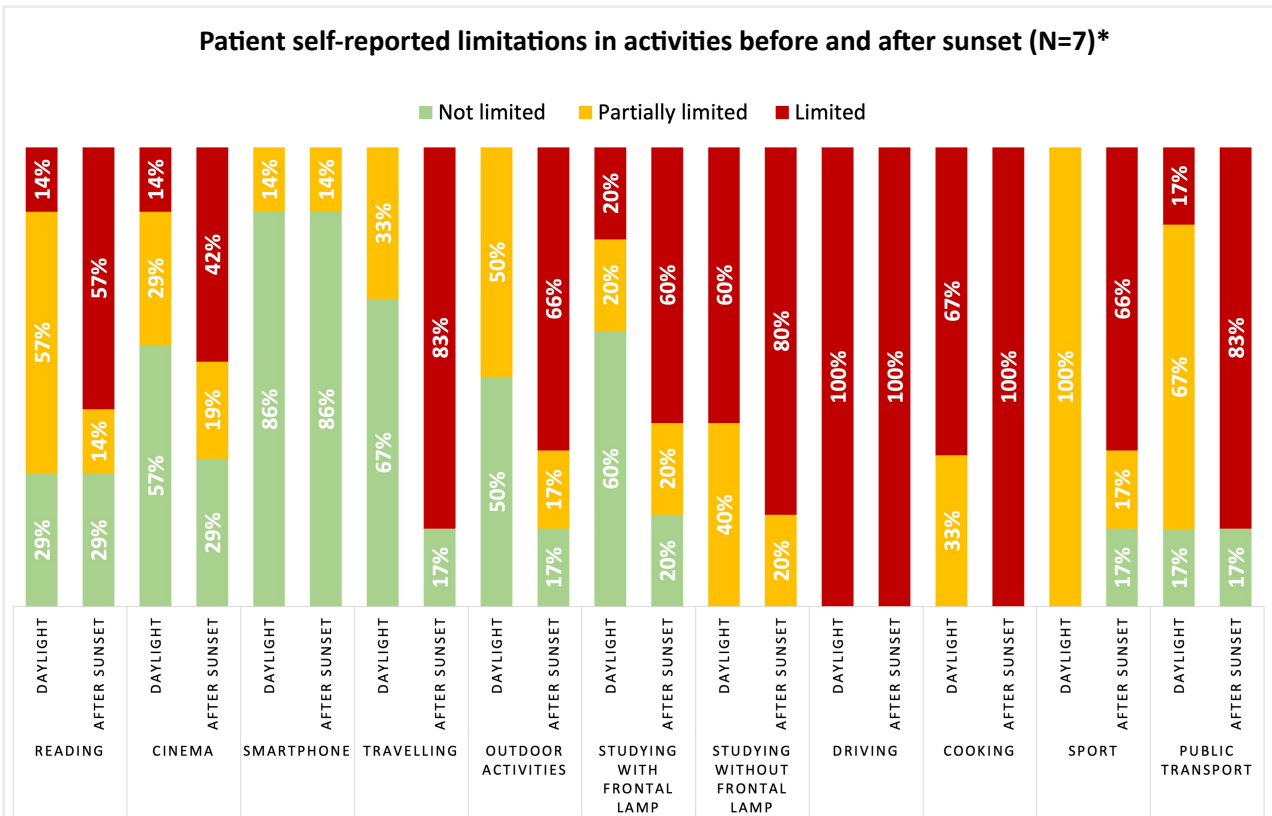

\*Non-responses = 1

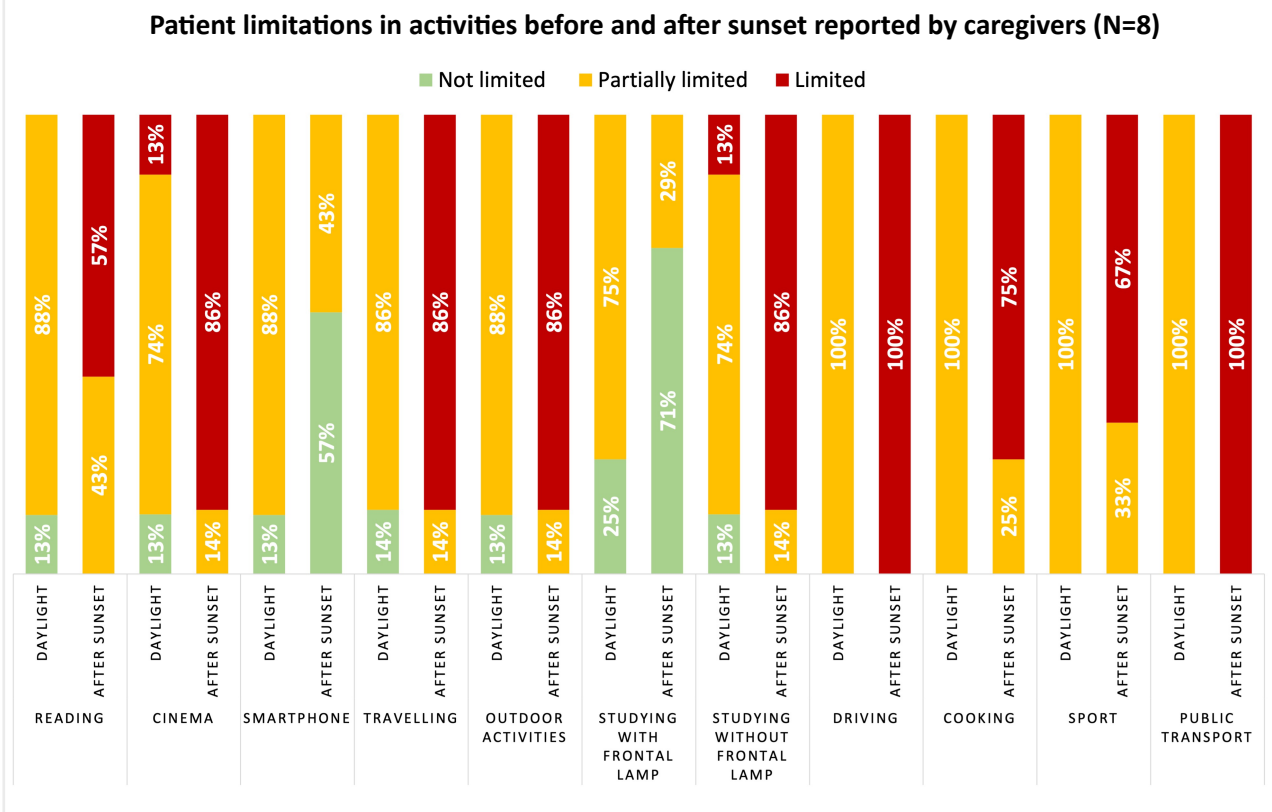

Figure 5 - Patients' QoL and RPE65-related IRDs overall interference on activities as perceived by patients and caregivers

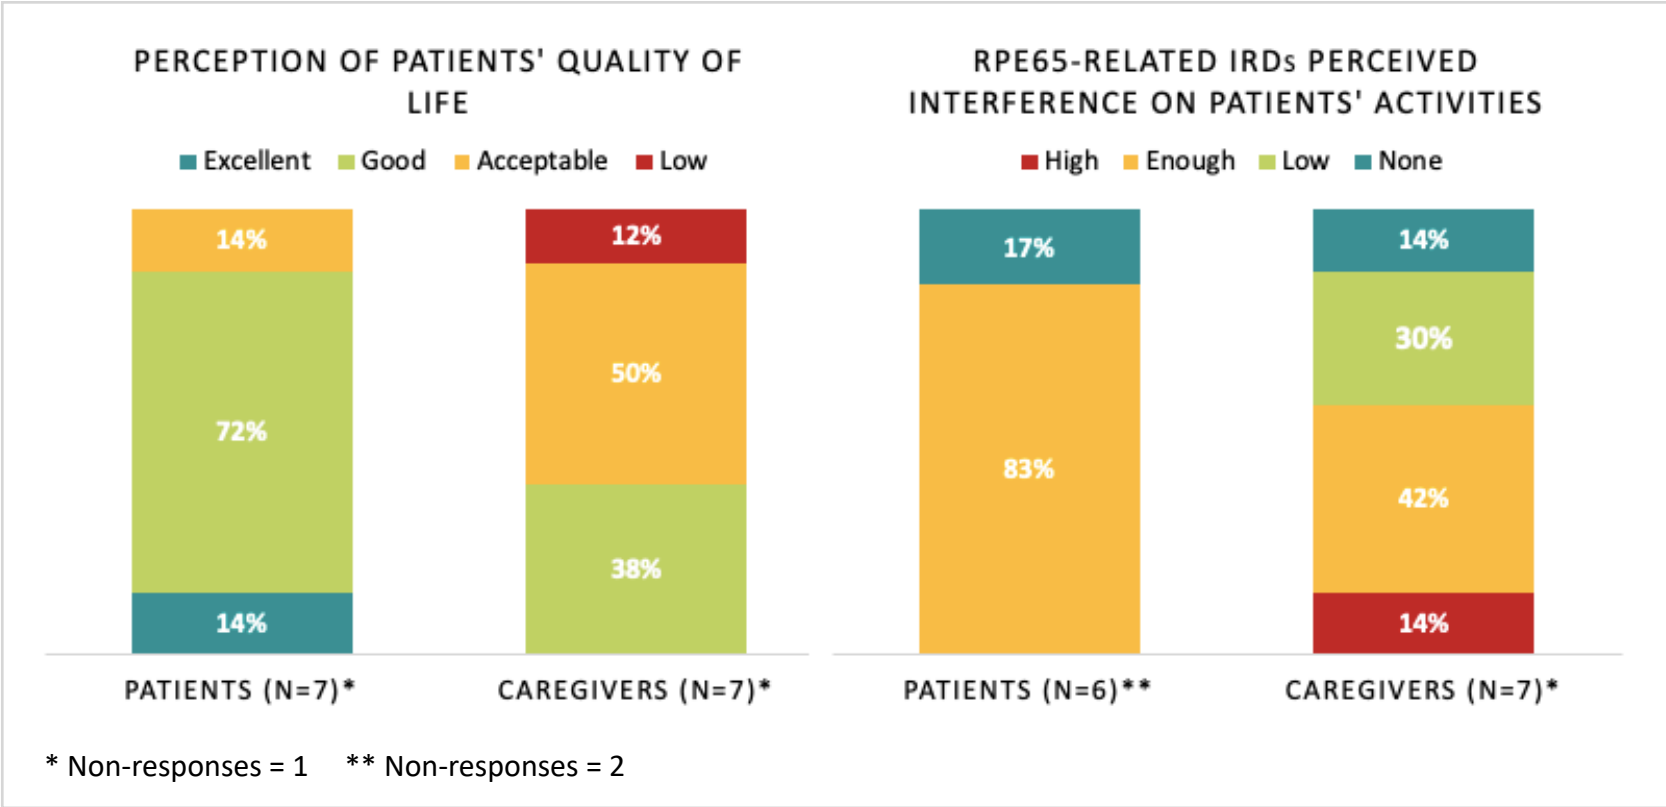

## Supplementary file 1

### Eye clinics specialised in Inherited Retinal Disorders (IRDs) involved in the BIRDS project

1. CRR Hereditary Retinal Degeneration, Careggi University Hospital – Florence, Italy
2. Paediatric Ophthalmology Unit, Children’s Hospital A. Meyer – Florence, Italy
3. Department of Ophthalmology, Fondazione Policlinico Universitario A. Gemelli IRCCS, Università Cattolica del Sacro Cuore – Rome, Italy
4. Ophthalmology Department, Bambino Gesù IRCCS Paediatric Hospital – Rome, Italy
5. Multidisciplinary Department of Medical Surgical and Dental Specialties, Luigi Vanvitelli University Hospital – Naples, Italy

## Supplementary file 2 – Illness plots and parallel chart

### 2.1. Illness plot addressed to patients

*We invite you to tell us about your experience of living with a hereditary retinal disorder related to the RPE65 gene (RPE65-related IRD). You can write instinctively and freely, regardless of the form and length of your narrative. Any episode you consider significant will be welcome.*

Before the IRD clinical diagnosis... The first signs that something was wrong... I felt... To understand what it was about... The facilities I visited, the healthcare professionals I met... Waiting for the clinical diagnosis... When they told me that it was an IRD, I felt... The genetic test for me was... That time, with family... With others... For me, seeing was... The activities I liked to do... The activities I could not do... At school/work... Healthcare professionals and treatments were... The centre where I am treated... Healthcare professionals and treatments are... Gene therapy for me is... Between one visit and the next... With my family... With other people... For me, seeing is... The activities I like to do... The activities I cannot do... Today at school/work... Rethinking about my care pathway, I would have liked that... Thinking about tomorrow, I feel... For tomorrow, I would like to...

*Thank you for your time, energy and attention. We ask you one last question: How did you feel about writing your experience?*

### 2.2. Illness plot addressed to caregivers of patients with an RPE65-related IRD

*We invite you to tell us about your experience of living next to a person with a hereditary retinal disorder related to the RPE65 gene (RPE65-related IRD). You can write instinctively and freely, regardless of the form and length of your narrative. Any episode you consider significant will be welcome.*

Before the diagnosis of IRD... When we first noticed that something was wrong... I felt... She/he felt... To find out what it was... Looking at her/him I thought... The facilities we visited, the healthcare professionals we met... Before the IRD clinical diagnosis... When we were told that it was an IRD, I felt... For me, the genetic test was... At that time, she/he with the family... She/he with other people... For her/him, seeing was... The activities she/he liked to do... The activities she/he could not do... At school/work... For her/him, I wanted... Healthcare professionals and treatments were... Today I feel... Today she/he feels... The IRD is... The centre where she/he is treated... Treatments and caregivers are... Gene therapy for me is... Between one visit and the next... With family... With other people... For her/him, seeing is... The activities she/he likes to do... The activities she/he cannot do... Rethinking to the care pathway, I would have liked that... Thinking about tomorrow, I feel... For tomorrow, I would like to...

*Thank you for your time, energy and attention. We ask you one last question: How did you feel about writing your experience?*

### 2.3. Parallel chart on patients affected by an RPE65-related IRD addressed to healthcare professionals

The first time I saw this person with an IRD, I thought... The patient and her/his relatives told me... Addressing symptoms, they told me that she/he could do/not do... I felt... And I did... Waiting for the clinical diagnosis... When I had to communicate the clinical diagnosis... Proposing the genetic test was... The relationships with family and other people of the person with IRD... For her/him, seeing was... Between one visit and the next... In her/his activities at work/study/play... Today this person... With family and other people... Today this person, during work/study/play... The people next to her/him... My goal for this patient is... With her/him I feel... From the relationship with the patient, I've learned... For tomorrow, I wish that I... For tomorrow I hope she/he...

*Thank you for your time, energy and attention. We ask you one last question: How did you feel about writing your experience?*

## Supplementary file 3

### 3.1. Narrative from an underaged patient affected by an RPE65-related IRD

My mum realised that something was wrong when I was very young, about 18 months. I never felt different and was unaware of the difficulties. The professionals I met were helpful, kind, welcoming people who made me feel at home. While waiting for the diagnosis, I was very calm. When they told me that it was a hereditary retinal disease, nothing had changed for me. My eyes did not work as well as a healthy child's. The genetic test was a big step for me. The genetic test was just another test for me. At that time, we were very relaxed in my family. We had no particular problems with others. I've always seen that way. I don't know how others see. I like skating, dancing and cycling. At first, I could not ride a bike, then I did. I like school a lot, so I do not have any difficulties. Some pills I will remember all my life because they were terrible, but the rest of the treatment was easy. Today I feel happy. The disease is stable for now, and I feel calm. I have more than one centre, and they are doing everything they can. The doctors are very nice and friendly, and I don't have any special treatment. Gene therapy is a great possibility for me because it will help keep my eyes stable, which would be very positive. Between one visit and the next, I feel calm and have no particular tension. I feel very relaxed with my family. With others, I am a sunny child. Seeing is a beautiful thing because it allows me to relate to the outside world. I like riding my bike, being with my animals, being with friends. I cannot do team sports. School is going well, and I feel at ease; I am learning to use the computer. Rethinking about the care pathway, I think everyone did what they could and what was right to do. When I think about tomorrow, I feel happy with the people who love me, and I would like everything to remain as it is now.

### 3.2. Narrative from an adult patient affected by an RPE65-related IRD

I don't remember a precise year, but the first signs that something was wrong were around the age of 6 or 7 when we were driving at night, and I realised that I couldn't see what my father needed to go. I could only see the light sources but not what they were illuminating. When I was 15 years old, I was driving back to the institute on Sunday afternoons; it got dark on the way, and I had a hard time walking from the station to the institute. If I had to walk together with other blind people, I would have done it with ease. I felt very uncomfortable, inappropriate, and inexplicably clumsy. In the evenings, I could not move to go out alone. If I accompanied other blind people, even two, I felt no discomfort, and the journeys went smoothly. I knew about my illness. I also met ophthalmologists who seemed to know less about it than I did. For the hope of treatment or recovery, ophthalmologists had already been consulted for my brother before I was born, or at least when I was small. While waiting for the diagnosis, I never had any expectations. When I learned that it was a hereditary disease, I was a child, and I had no reaction. I did the genetic test when I was 54 and, since I knew that there is a lot of retinitis, it was pure curiosity. Is it positive or negative to learn at 54 what exactly you have? Negative because it shows how much interest there is in such a disease: very little. It's good that research is going on, even if it's at a snail's pace. Only my mother has an attitude of some hope.

1  
2  
3 Having changed places I've gone to live [...] I have no way of comparing before and after. I never hid  
4 my problem, so they took me as I was. Seeing, even a little, even with difficulty, even when the  
5 amount of light allowed me to do things, "seeing" was, of course, more accessible. But since I knew  
6 that I would lose my sight sooner or later and that this took place over quite an extended period, I  
7 used these facts to run for cover, with the aim of not stopping. I liked cycling, which is different from  
8 riding a tandem bike, going out to look for glimpses of views, reading comics. The reading in black  
9 and the cycle rides gradually faded away. At school: I couldn't see the blackboard and do my home-  
10 work alone. At work, as a teacher, I couldn't fill in the register by myself.

11 I only went for specific treatments for retinitis, useless but specific.

12 Today I feel the same as I did before. The disease has degenerated almost to the end. Functionally I  
13 am blind. Every now and then, I play the lamppost game, trying to catch the light from the lampposts  
14 as we walk down the street... in the evening.

15 When I go to the centre, I spend no less than 4 hours there, and 2 of them are waiting. So far, the  
16 people working there feel welcoming and helpful. So far, I've only had check-ups. I see gene therapy  
17 as an attempt to maintain the current faculties of the retina. We are still far from hoping for any  
18 kind of recovery, let alone a recovery measurable in tenths. I don't know why I've only had one visit  
19 to date where this therapy was mentioned for the first time. My family and I are on the same wave-  
20 length at the moment. So the family attends events to support my needs as they arise. I go to the  
21 swimming pool to do water gymnastics, with the others from our sports club we organise dinners in  
22 the dark. I have weekly music rehearsals with a group where only I am blind, we go to play in clubs,  
23 I go to see sculpture exhibitions if it is allowed to touch, of course. With my wife, who is also blind,  
24 we travel: when I have the chance, I like to get to know the cities, walking in their historical centres,  
25 alone. I read and listen to music. Unfortunately, I like to eat, so every opportunity is good to try a  
26 new restaurant. In everyday life, I am autonomous. Since there are many things I can do as a blind  
27 person, it seems useless to me to try at all costs to do something where sight is the only possibility.  
28 Like, for example: driving. I am autonomous in my activities; I only find difficulties when the com-  
29 puter aids are not adequate or modify the websites without considering the rules needed to include  
30 visually impaired users. I have been using personal assistants selected and trained by me for years  
31 in those areas where only sight works. Thinking back to my own care path, I would have liked to  
32 have had this care in the 1960s. My future is not conditioned by the presence of this care. But it  
33 seems worthwhile to me to do it: what will be, will be. We visually impaired people need civilisation.  
34 If in the behaviour of citizens, people, institutions, the observance of rules also prevails in the reali-  
35 sation of public and social things, we are in the right place. But in our society, this does not happen  
36 to a sufficient extent, so tomorrow will still be about making do as one can, with or without this  
37 care.

### 3.3. Narrative from a caregiver of a patient affected by an RPE65-related IRD

38 We toured the hospitals in our region. Visit after visit, the anamnesis and electrophysiological ex-  
39 aminations were not sufficient for a diagnosis. Many signs and symptoms were confused between  
40 the different diseases affecting the retina. At six months, we realised that something was wrong  
41 with the involuntary eye movement, always searching for light, the lack of eye contact between



1  
2  
3 mother and child during breastfeeding. I felt an immense sense of absolute helplessness as a parent  
4 in front of her baby. I really needed to understand why... He is a very peaceful child; he plays, jumps,  
5 learns something new every day and knows how to give so much love. To understand what it was  
6 all about, we researched the subject because it helps us accept. I would see him and think that it's  
7 just a bad dream, with the hope of waking up to normality. We met very helpful and wonderful  
8 people.  
9

10  
11 When they told us that we needed to take a genetic test, I thought that there were no relatives with  
12 severe vision problems; it seemed so absurd. The genetic test was a simple saliva sample that al-  
13 lowed for greater accuracy; the genetic diagnosis was essential to know the gene that causes the  
14 disease. The wait for the diagnosis seemed like an eternity. The diagnosis, when it came, was a  
15 starting point; news like that turns your life upside down. He is a very calm child and learns every  
16 day to become more and more autonomous. When they told us that it was a hereditary retinal  
17 disease, I felt terrible because you don't expect it. It seems impossible to me to have a congenital  
18 disorder of a genetic nature in a family where there were no known cases. At that time, the envi-  
19 ronment was fundamental because I was more autonomous. At home, with the organisation of  
20 spaces, he moves on his own, and so he gets used to making do. He is friendly and loves being with  
21 other kids; he is cheerful, curious, and intelligent. There is a difference between seeing the light and  
22 not seeing it at all, so we are confident that everything has not degenerated. He likes to do every-  
23 thing, watch cartoons and knows some dialogues by heart. Among the activities he finds hard to do  
24 are playing football, drawing, playing basketball. As a parent, the only thing you want in life is to  
25 protect your children. It is challenging to live with this disease because I have mortifications in every  
26 area of life. We are waiting for the gene therapy to finally allow us to see the light at the end of the  
27 tunnel.  
28

29  
30 Today I feel very serene, and I never stop dreaming that after the discovery, the waiting, the hope,  
31 the light will finally come. Today he feels more peaceful, and day after day, he learns to be more  
32 vital to face his life. The disease is genetic, rare, incurable; we are healthy carriers of the defect and  
33 have passed it on to our son. The hospital that is treating us is a centre of excellence, and we have  
34 carried out the genetic test. Getting a diagnosis for a rare disease is not always easy. It is a long and  
35 tiring process. The time between checks is too long. For me, gene therapy would be the miracle we  
36 have been waiting for, as we are entering an era where diseases that were once incurable are be-  
37 coming curable. Thanks to the love of those around him, he is learning to live with all the strength  
38 he needs. He is an adorable child and knows how to make others love him. He is a very healthy child  
39 who rarely gets sick. His eyesight is not yet very impaired; otherwise, he is very cheerful. Rethinking  
40 the care pathway, I would have liked to have had more information on this disease's knowledge,  
41 together with the proper psychological and educational support. If I had to imagine a service for all  
42 the people with the same disease as my son, I would think of a specialised centre for this disease,  
43 which could guarantee proper support for parents who face enormous difficulties. When I think of  
44 tomorrow, I don't know what awaits us. Still, we are very enthusiastic about the progress of science.  
45 I would like to see proper care centres and improved schooling for people with this disease in the  
46 future. Reading difficulties are essential, and there is a lack of adequate tools to deal with them.  
47  
48  
49  
50  
51  
52  
53  
54  
55  
56  
57  
58  
59  
60

### 3.4. Parallel chart on a patient affected by an RPE65-related IRD from a healthcare professional

Poor child: he is not living his life like his other healthy peers. The parents reported that they needed advice on how to make him as autonomous as possible. He could not play, run, be independent in his personal and school affairs. He could not orientate himself in space. The situation worsened from sunset onwards when the child panicked. The whole family hardly ever went out in the evening, not even for a simple dinner. I felt obliged to build a personalised rehabilitation programme to find alternative strategies to give the family tools and reassure the child to increase his self-esteem. I asked the child to tell me everything he wanted to do, everything he thought to do poorly, and his fears when he got stuck on various occasions. I asked the parents what they saw when they were with their child, their fears, their difficulties, what they wanted help with, what they hoped for. I gradually started to indicate how to organise the house according to the child's size, what light or contrast measures should be taken and how to organise the school material to make it more usable. It was not my job to communicate the diagnosis.

Other people often do not understand what and how he sees, so it ranges from denial to being overprotective. To see was not to fall, not to stumble, play football, watch television together with the family, write in the notebook without difficulty, and read without difficulty. The family was heartened and happy about the small degree of autonomy their child was able to achieve. The child began to experiment on his own without requiring the constant presence of others. When studying, the child felt frustrated because he realised that he could not write or read like the others. He felt different because he could not demonstrate his abilities and was frustrated because he could not keep up with others.

Today, he is more confident about himself, his abilities and also his limits. He has learned to set himself small goals, overcome them with his own alternative strategies and move forward. With other people, he is more present and less dependent. At school, he has found his own alternative methods to do almost the same as other peers; he participates more in the class group and verbalises his visual difficulties when he has a problem. The people around him seem more serene and confident in his potential. My aim is to make him aware of his challenges to face them with alternative strategies and overcome them even if with limitations. I feel stimulated to find with him alternative solutions to make him autonomous. I am learning from the caring relationship that there is no limit to the potential.

I would like to be able to help them even more in the future. I would like him to be aware of how extraordinary his will power is.

# Supplementary file 4 – Reported limitations in activities by patients and caregivers

## 4.1. Patient self-reported limitations in activities before and after sunset (N=7\*)

1  
2  
3  
4  
5  
6  
7  
8  
9  
10  
11  
12  
13  
14  
15  
16  
17  
18  
19  
20  
21  
22  
23  
24  
25  
26  
27  
28  
29  
30  
31  
32  
33  
34  
35  
36  
37  
38  
39  
40  
41  
42  
43  
44  
45  
46

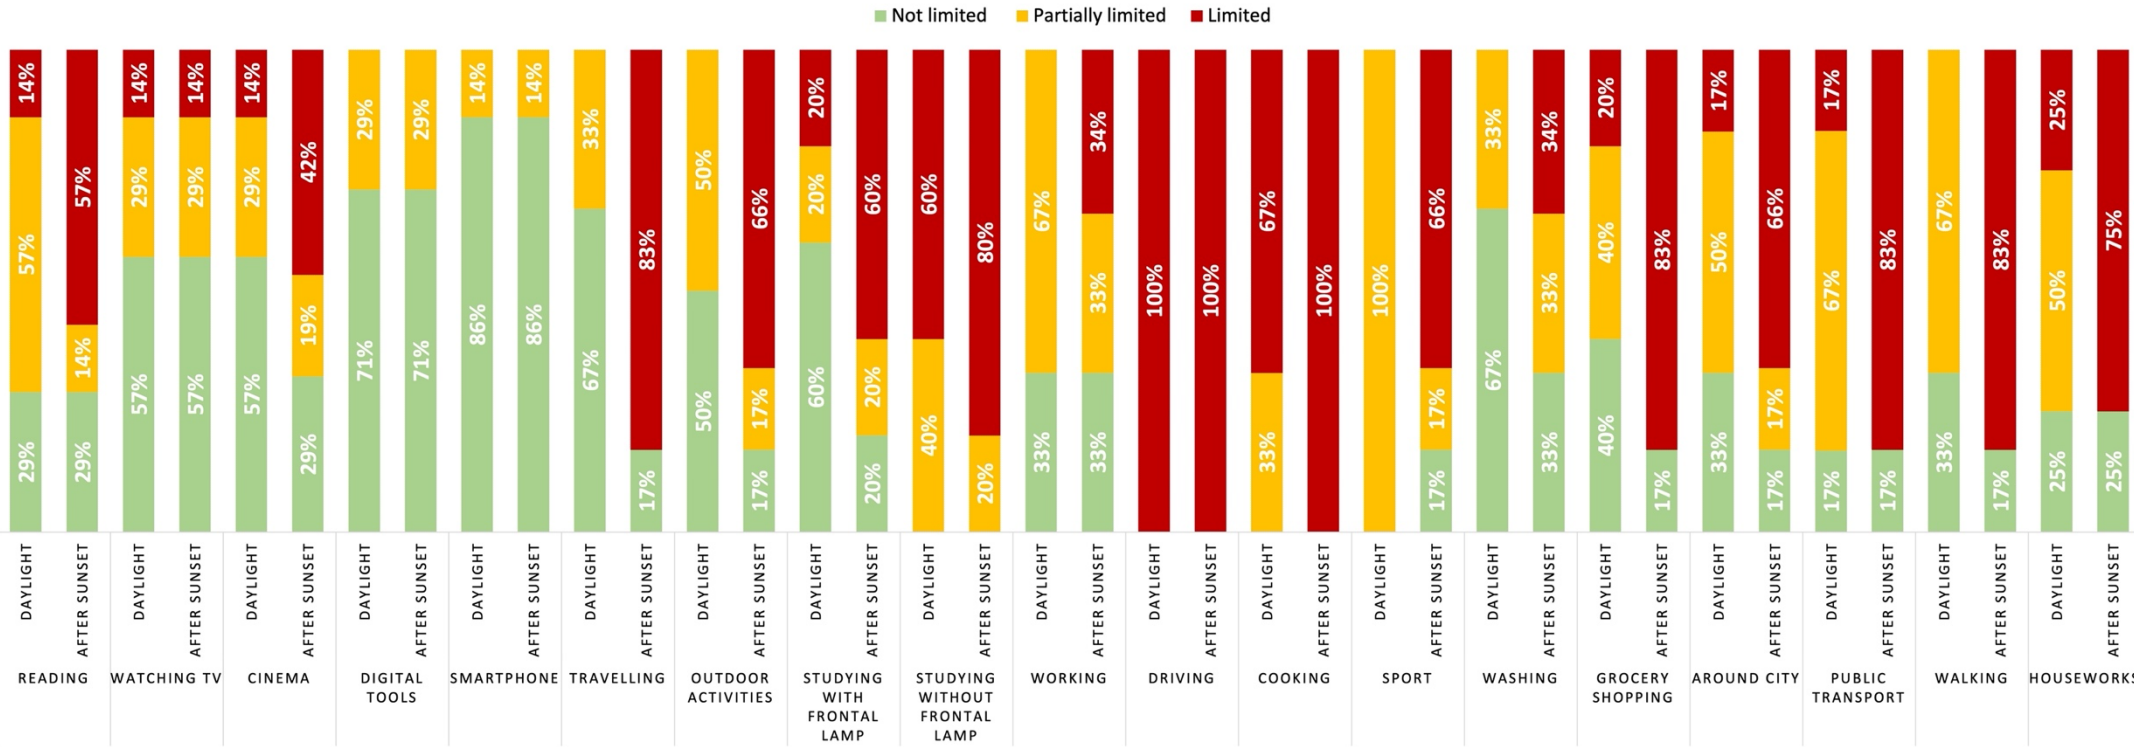

\*Non-responses: 1.

4.2. Patient limitations in activities before and after sunset reported by caregivers (N=8)

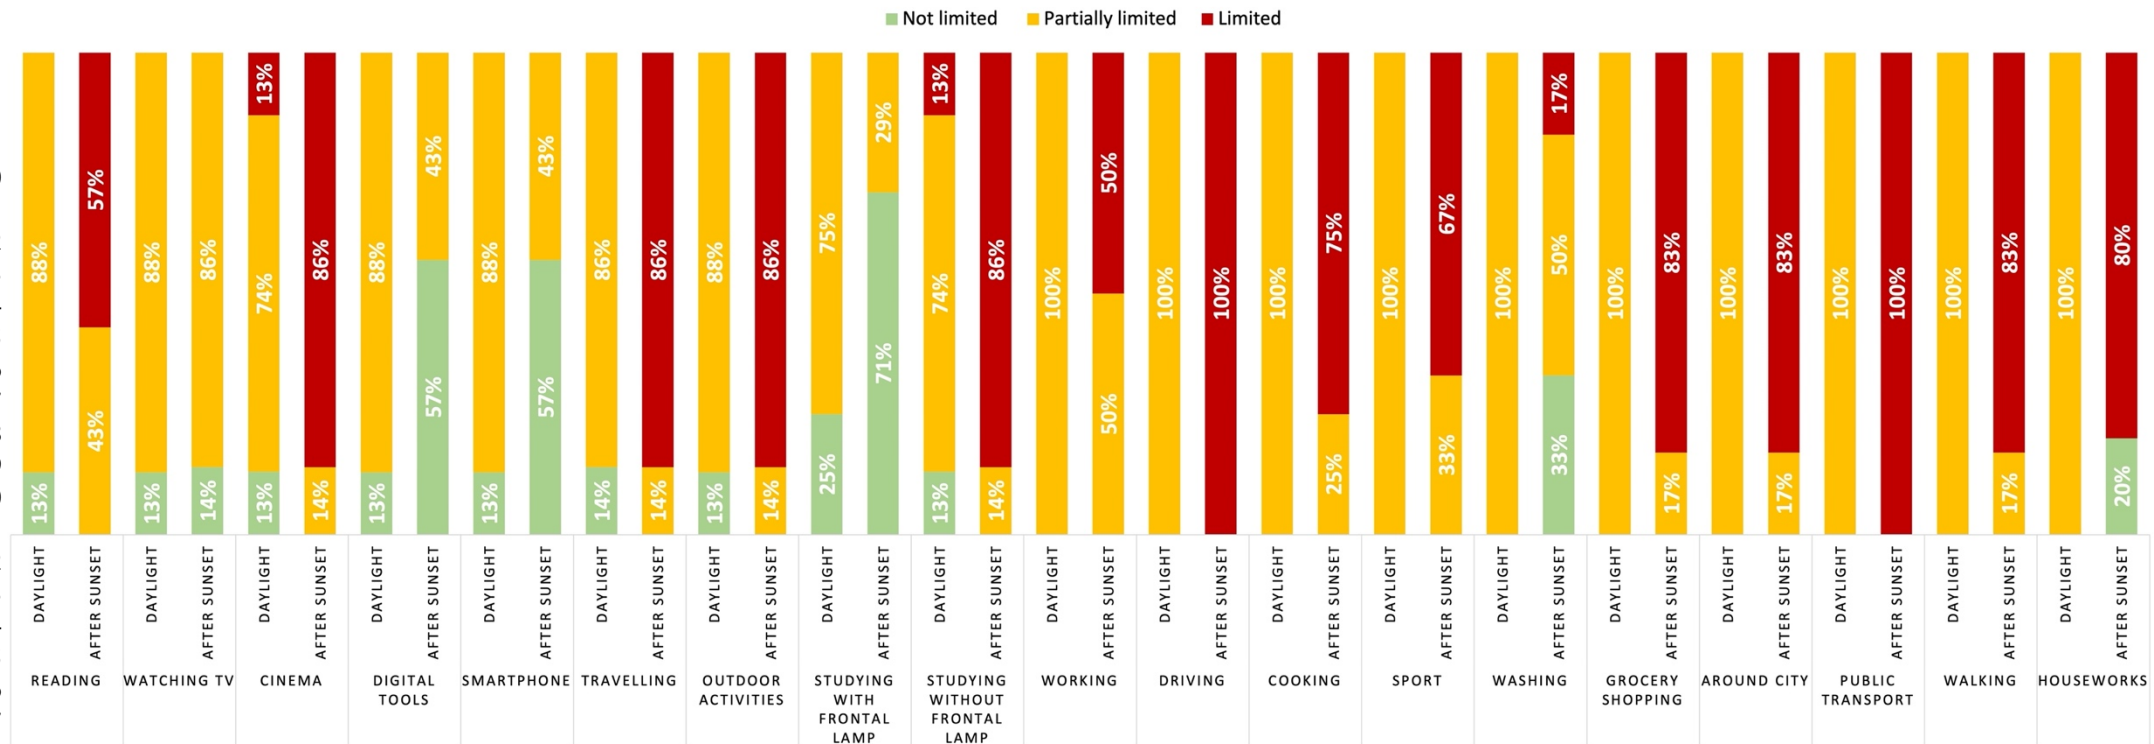

## Standards for Reporting Qualitative Research (SRQR)\*

<http://www.equator-network.org/reporting-guidelines/srqr/>

Page/line no(s).

### Title and abstract

|                                                                                                                                                                                                                                                              |                 |
|--------------------------------------------------------------------------------------------------------------------------------------------------------------------------------------------------------------------------------------------------------------|-----------------|
| <p><b>Title</b> - Concise description of the nature and topic of the study Identifying the study as qualitative or indicating the approach (e.g., ethnography, grounded theory) or data collection methods (e.g., interview, focus group) is recommended</p> | p. 1, ll. 1-3   |
| <p><b>Abstract</b> - Summary of key elements of the study using the abstract format of the intended publication; typically includes background, purpose, methods, results, and conclusions</p>                                                               | p. 2, ll. 34-56 |

### Introduction

|                                                                                                                                                                     |                    |
|---------------------------------------------------------------------------------------------------------------------------------------------------------------------|--------------------|
| <p><b>Problem formulation</b> - Description and significance of the problem/phenomenon studied; review of relevant theory and empirical work; problem statement</p> | pp. 3-4, ll. 64-91 |
| <p><b>Purpose or research question</b> - Purpose of the study and specific objectives or questions</p>                                                              | p. 4, ll. 92-101   |

### Methods

|                                                                                                                                                                                                                                                                                                                                                                                                             |                      |
|-------------------------------------------------------------------------------------------------------------------------------------------------------------------------------------------------------------------------------------------------------------------------------------------------------------------------------------------------------------------------------------------------------------|----------------------|
| <p><b>Qualitative approach and research paradigm</b> - Qualitative approach (e.g., ethnography, grounded theory, case study, phenomenology, narrative research) and guiding theory if appropriate; identifying the research paradigm (e.g., postpositivist, constructivist/ interpretivist) is also recommended; rationale**</p>                                                                            | p. 4, ll. 83-91      |
| <p><b>Researcher characteristics and reflexivity</b> - Researchers' characteristics that may influence the research, including personal attributes, qualifications/experience, relationship with participants, assumptions, and/or presuppositions; potential or actual interaction between researchers' characteristics and the research questions, approach, methods, results, and/or transferability</p> | p. 6, ll. 135-136    |
| <p><b>Context</b> - Setting/site and salient contextual factors; rationale**</p>                                                                                                                                                                                                                                                                                                                            | p. 5, ll. 104-107    |
| <p><b>Sampling strategy</b> - How and why research participants, documents, or events were selected; criteria for deciding when no further sampling was necessary (e.g., sampling saturation); rationale**</p>                                                                                                                                                                                              | p. 5, ll. 113-116    |
| <p><b>Ethical issues pertaining to human subjects</b> - Documentation of approval by an appropriate ethics review board and participant consent, or explanation for lack thereof; other confidentiality and data security issues</p>                                                                                                                                                                        | p. 6, ll. 141-149    |
| <p><b>Data collection methods</b> - Types of data collected; details of data collection procedures including (as appropriate) start and stop dates of data collection and analysis, iterative process, triangulation of sources/methods, and modification of procedures in response to evolving study findings; rationale**</p>                                                                             | pp. 5-6, ll. 117-134 |

|                       |                                                                                                                                                                                                                                                       |                      |
|-----------------------|-------------------------------------------------------------------------------------------------------------------------------------------------------------------------------------------------------------------------------------------------------|----------------------|
| 1<br>2<br>3<br>4<br>5 | <b>Data collection instruments and technologies</b> - Description of instruments (e.g., interview guides, questionnaires) and devices (e.g., audio recorders) used for data collection; if/how the instrument(s) changed over the course of the study | pp. 5-6, ll. 117-134 |
| 6<br>7<br>8           | <b>Units of study</b> - Number and relevant characteristics of participants, documents, or events included in the study; level of participation (could be reported in results)                                                                        | pp. 7-8, ll. 170-175 |
| 9<br>10<br>11<br>12   | <b>Data processing</b> - Methods for processing data prior to and during analysis, including transcription, data entry, data management and security, verification of data integrity, data coding, and anonymization/de-identification of excerpts    | pp. 6-7, ll. 150-168 |
| 13<br>14<br>15<br>16  | <b>Data analysis</b> - Process by which inferences, themes, etc., were identified and developed, including the researchers involved in data analysis; usually references a specific paradigm or approach; rationale**                                 | pp. 6-7, ll. 150-168 |
| 17<br>18<br>19<br>20  | <b>Techniques to enhance trustworthiness</b> - Techniques to enhance trustworthiness and credibility of data analysis (e.g., member checking, audit trail, triangulation); rationale**                                                                | //                   |

### Results/findings

|                      |                                                                                                                                                                                                   |                       |
|----------------------|---------------------------------------------------------------------------------------------------------------------------------------------------------------------------------------------------|-----------------------|
| 23<br>24<br>25<br>26 | <b>Synthesis and interpretation</b> - Main findings (e.g., interpretations, inferences, and themes); might include development of a theory or model, or integration with prior research or theory | pp. 7-16, ll. 169-300 |
| 27<br>28<br>29       | <b>Links to empirical data</b> - Evidence (e.g., quotes, field notes, text excerpts, photographs) to substantiate analytic findings                                                               | pp. 7-16, ll. 169-300 |

### Discussion

|                                        |                                                                                                                                                                                                                                                                                                                                                                                                             |                        |
|----------------------------------------|-------------------------------------------------------------------------------------------------------------------------------------------------------------------------------------------------------------------------------------------------------------------------------------------------------------------------------------------------------------------------------------------------------------|------------------------|
| 32<br>33<br>34<br>35<br>36<br>37<br>38 | <b>Integration with prior work, implications, transferability, and contribution(s) to the field</b> - Short summary of main findings; explanation of how findings and conclusions connect to, support, elaborate on, or challenge conclusions of earlier scholarship; discussion of scope of application/generalizability; identification of unique contribution(s) to scholarship in a discipline or field | pp. 16-19, ll. 300-371 |
| 39<br>40                               | <b>Limitations</b> - Trustworthiness and limitations of findings                                                                                                                                                                                                                                                                                                                                            | pp. 19-20, ll. 372-380 |

### Other

|                |                                                                                                                                               |                        |
|----------------|-----------------------------------------------------------------------------------------------------------------------------------------------|------------------------|
| 43<br>44<br>45 | <b>Conflicts of interest</b> - Potential sources of influence or perceived influence on study conduct and conclusions; how these were managed | pp. 21-22, ll. 424-427 |
| 46<br>47<br>48 | <b>Funding</b> - Sources of funding and other support; role of funders in data collection, interpretation, and reporting                      | p. 22, ll. 428-429     |

\*The authors created the SRQR by searching the literature to identify guidelines, reporting standards, and critical appraisal criteria for qualitative research; reviewing the reference lists of retrieved sources; and contacting experts to gain feedback. The SRQR aims to improve the transparency of all aspects of qualitative research by providing clear standards for reporting qualitative research.

1  
2  
3  
4  
5  
6  
7  
8  
9  
10  
11  
12  
13  
14  
15  
16  
17  
18  
19  
20  
21  
22  
23  
24  
25  
26  
27  
28  
29  
30  
31  
32  
33  
34  
35  
36  
37  
38  
39  
40  
41  
42  
43  
44  
45  
46  
47  
48  
49  
50  
51  
52  
53  
54  
55  
56  
57  
58  
59  
60

\*\*The rationale should briefly discuss the justification for choosing that theory, approach, method, or technique rather than other options available, the assumptions and limitations implicit in those choices, and how those choices influence study conclusions and transferability. As appropriate, the rationale for several items might be discussed together.

**Reference:**

O'Brien BC, Harris IB, Beckman TJ, Reed DA, Cook DA. **Standards for reporting qualitative research: a synthesis of recommendations.** *Academic Medicine*, Vol. 89, No. 9 / Sept 2014  
DOI: 10.1097/ACM.0000000000000388

For peer review only

# BMJ Open

**Narrative Medicine to investigate the quality-of-life and emotional impact of inherited retinal disorders through the perspectives of patients, caregivers, and clinicians: an Italian multicentre project.**

|                                 |                                                                                                                                                                                                                                                                                                                                                                                                                                                                                                                                                                                                                                                                                                                                                                                                                                                                                                                                                                                                                                                                                                                                                  |
|---------------------------------|--------------------------------------------------------------------------------------------------------------------------------------------------------------------------------------------------------------------------------------------------------------------------------------------------------------------------------------------------------------------------------------------------------------------------------------------------------------------------------------------------------------------------------------------------------------------------------------------------------------------------------------------------------------------------------------------------------------------------------------------------------------------------------------------------------------------------------------------------------------------------------------------------------------------------------------------------------------------------------------------------------------------------------------------------------------------------------------------------------------------------------------------------|
| Journal:                        | <i>BMJ Open</i>                                                                                                                                                                                                                                                                                                                                                                                                                                                                                                                                                                                                                                                                                                                                                                                                                                                                                                                                                                                                                                                                                                                                  |
| Manuscript ID                   | bmjopen-2022-061080.R1                                                                                                                                                                                                                                                                                                                                                                                                                                                                                                                                                                                                                                                                                                                                                                                                                                                                                                                                                                                                                                                                                                                           |
| Article Type:                   | Original research                                                                                                                                                                                                                                                                                                                                                                                                                                                                                                                                                                                                                                                                                                                                                                                                                                                                                                                                                                                                                                                                                                                                |
| Date Submitted by the Author:   | 01-Jul-2022                                                                                                                                                                                                                                                                                                                                                                                                                                                                                                                                                                                                                                                                                                                                                                                                                                                                                                                                                                                                                                                                                                                                      |
| Complete List of Authors:       | Simonelli, Francesca; University of Campania "L. Vanvitelli, Eye Clinic, Multidisciplinary Department of Medical, Surgical and Dental Sciences<br>Sodi, Andrea; University of Florence, Department of Neuroscience, Psychology, Drug Research and Child Health<br>Falsini, Benedetto; Fondazione Policlinico Universitario Agostino Gemelli IRCCS, UOC Oftalmologia<br>Bacci, Giacomo; Children's Hospital A. Meyer, University of Florence, Pediatric Ophthalmology Unit<br>Iarossi, Giancarlo; Bambino Gesù IRCCS Pediatric Hospital, Ophthalmology Department<br>Di Iorio, Valentina; University of Campania "L. Vanvitelli", Eye Clinic, Multidisciplinary Department of Medical, Surgical and Dental Sciences<br>Giorgio, Dario; University of Florence, Department of Neuroscience, Psychology, Drug Research and Child Health<br>Placidi, Giorgio; Fondazione Policlinico Universitario Agostino Gemelli IRCCS, UOC Oftalmologia<br>Andrao, Assia; Retina Italia Onlus Association<br>WG, BIRDS ; Healthcare Area, ISTUD<br>Reale, Luigi; ISTUD Foundation<br>Fiorencis, Alessandra; Fondazione ISTUD,<br>Aoun, Manar; Novartis Farma SpA |
| <b>Primary Subject Heading</b>: | Ophthalmology                                                                                                                                                                                                                                                                                                                                                                                                                                                                                                                                                                                                                                                                                                                                                                                                                                                                                                                                                                                                                                                                                                                                    |
| Secondary Subject Heading:      | Qualitative research                                                                                                                                                                                                                                                                                                                                                                                                                                                                                                                                                                                                                                                                                                                                                                                                                                                                                                                                                                                                                                                                                                                             |
| Keywords:                       | Paediatric ophthalmology < OPHTHALMOLOGY, Medical retina < OPHTHALMOLOGY, QUALITATIVE RESEARCH                                                                                                                                                                                                                                                                                                                                                                                                                                                                                                                                                                                                                                                                                                                                                                                                                                                                                                                                                                                                                                                   |
|                                 |                                                                                                                                                                                                                                                                                                                                                                                                                                                                                                                                                                                                                                                                                                                                                                                                                                                                                                                                                                                                                                                                                                                                                  |

SCHOLARONE™  
Manuscripts





I, the Submitting Author has the right to grant and does grant on behalf of all authors of the Work (as defined in the below author licence), an exclusive licence and/or a non-exclusive licence for contributions from authors who are: i) UK Crown employees; ii) where BMJ has agreed a CC-BY licence shall apply, and/or iii) in accordance with the terms applicable for US Federal Government officers or employees acting as part of their official duties; on a worldwide, perpetual, irrevocable, royalty-free basis to BMJ Publishing Group Ltd ("BMJ") its licensees and where the relevant Journal is co-owned by BMJ to the co-owners of the Journal, to publish the Work in this journal and any other BMJ products and to exploit all rights, as set out in our [licence](#).

The Submitting Author accepts and understands that any supply made under these terms is made by BMJ to the Submitting Author unless you are acting as an employee on behalf of your employer or a postgraduate student of an affiliated institution which is paying any applicable article publishing charge ("APC") for Open Access articles. Where the Submitting Author wishes to make the Work available on an Open Access basis (and intends to pay the relevant APC), the terms of reuse of such Open Access shall be governed by a Creative Commons licence – details of these licences and which [Creative Commons](#) licence will apply to this Work are set out in our licence referred to above.

Other than as permitted in any relevant BMJ Author's Self Archiving Policies, I confirm this Work has not been accepted for publication elsewhere, is not being considered for publication elsewhere and does not duplicate material already published. I confirm all authors consent to publication of this Work and authorise the granting of this licence.

1  
2  
3  
4 1 **Narrative Medicine to investigate the quality-of-life and emotional**  
5  
6 2 **impact of inherited retinal disorders through the perspectives of patients,**  
7  
8 3 **caregivers, and clinicians: an Italian multicentre project.**  
9

10 4 Francesca Simonelli<sup>1</sup>, Andrea Sodi<sup>2</sup>, Benedetto Falsini<sup>3,4</sup>, Giacomo Bacci<sup>5</sup>, Giancarlo Iarossi<sup>6</sup>,  
11 5 Valentina Di Iorio<sup>1</sup>, Dario Giorgio<sup>2</sup>, Giorgio Placidi<sup>3,4</sup>, Assia Andrao<sup>7</sup>, BIRDS Working Group, Luigi  
12 6 Reale<sup>8</sup>, Alessandra Fiorencis<sup>8</sup>, Manar Aoun<sup>9</sup>  
13  
14  
15  
16 7

17  
18 8 **“BIRDS – The Beat of IRD Stories” Working Group:** Giovanni Bosco Vitiello<sup>1</sup>, Amelia Citro<sup>1</sup>, Simona  
19 9 De Simone<sup>1</sup>, Irene De Rienzo<sup>10</sup>, Natalia Filimonova<sup>11</sup>, Stefania Fortini<sup>12</sup>, Cristiana Marchese<sup>7</sup>, Maria  
20 10 Giulia Marini<sup>8</sup>, Dario Pasquale Mucciolo<sup>2</sup>, Vittoria Murro<sup>2</sup>, Ilaria Passerini<sup>13</sup>, Simona Turco<sup>12</sup>  
21  
22

23 11 <sup>1</sup> Eye Clinic, Multidisciplinary Department of Medical, Surgical and Dental Sciences, University of Campania “L.  
24 12 Vanvitelli” – Naples, Italy

25 12 <sup>2</sup> Department of Neuroscience, Psychology, Drug Research and Child Health, University of Florence – Florence,  
26 13 Italy  
27 14

28 14 <sup>3</sup> UOC Oftalmologia, Fondazione Policlinico Universitario A. Gemelli IRCCS, Rome, Italy  
29 15

30 15 <sup>4</sup> Università Cattolica del Sacro Cuore, 00168 Rome, Italy  
31 16

32 16 <sup>5</sup> Pediatric Ophthalmology Unit, Children’s Hospital “A. Meyer”, University of Florence – Florence, Italy  
33 17

34 17 <sup>6</sup> Ophthalmology Department, Bambino Gesù IRCCS Pediatric Hospital – Rome, Italy  
35 18

36 18 <sup>7</sup> Retina Italia Onlus Association – Italy  
37 19

38 19 <sup>8</sup> Healthcare Area, ISTUD – Milano, Italy  
39 20

40 20 <sup>9</sup> Novartis Farma – Origgio, Italy,  
41 21

42 21 <sup>10</sup> Department of Ophthalmology, Careggi University Hospital - Florence, Italy  
43 22

44 22 <sup>11</sup> Novartis Pharma AG – Basel, Switzerland  
45 23

46 23 <sup>12</sup> National Center of Services and Research for the Prevention of Blindness and Rehabilitation of the Visually  
47 24 Impaired, WHOCC ITA-100/Fondazione Policlinico Universitario A. Gemelli IRCCS, Roma, Italy  
48 25

49 25 <sup>13</sup> Department of Genetic Diagnosis, Careggi Teaching Hospital – Florence, Italy  
50 26  
51 27

52 27 \*Corresponding authors: Luigi Reale, Healthcare Area, Fondazione ISTUD – via Paolo Lomazzo 19, 20124  
53 28 Milano, Italy. Tel. +39 0323 933 801, Mobile +39 3484759910, e-mail: [lreale@istud.it](mailto:lreale@istud.it)  
54 29

55 29 Francesca Simonelli, University of Campania “L. Vanvitelli” – via S. Pansini 5, 80131. Tel. +39 081 5666607, e-  
56 30 mail: [francesca.simonelli@unicampania.it](mailto:francesca.simonelli@unicampania.it)  
57 31  
58 32

59 32 **Word count:** 4247 words  
60 33

## 34 **ABSTRACT**

35 **Objectives.** Although inherited retinal disorders (IRDs) related to the gene encoding the retinal  
36 pigment epithelium 65kD protein (RPE65) significantly impact the vision-related quality of life  
37 (VRQoL), their emotional and social aspects remain poorly investigated in Italy. Narrative Medicine  
38 (NM) reveals the more intimate aspects of the illness experience, providing insights into clinical  
39 practice.

40 **Design and setting.** This NM project was conducted in Italy between July and December 2020 and  
41 involved five eye clinics specialised in IRDs. Illness plots and parallel charts, together with a  
42 sociodemographic survey, were collected through the project's website; remote in-depth interviews  
43 were also conducted. Narratives and interviews were analysed through Nvivo software and  
44 interpretive coding.

45 **Participants.** Three paediatric and five adult patients and eight caregivers participated in the  
46 project; 11 retinologists globally wrote 27 parallel charts; five professionals from hospital-based  
47 multidisciplinary teams and one Patient Association member were interviewed.

48 **Results.** Findings confirmed that RPE65-related IRDs impact VRQoL in terms of activities and  
49 mobility limitations. The emotional aspects emerged as crucial in the clinical encounter and as  
50 informative on IRD management challenges and real-life experiences, while psychological support  
51 was addressed as critical from clinical diagnosis throughout the care pathway for both patients and  
52 caregivers; the need for an IRDs "culture" emerged to acknowledge these conditions and therefore  
53 promoting diversity within society.

54 **Conclusions.** The project was the first effort to investigate the impact of RPE65-related IRDs on the  
55 illness experience through NM, concomitantly addressing the perspectives of paediatric and adult  
56 patients, caregivers, and healthcare professionals and provided preliminary insights for the  
57 knowledge of RPE65-related IRDs and the clinical practice.

1  
2  
3 58 **Keywords:** inherited retinal dystrophies, *RPE65* gene, narrative medicine, illness experience, vision-  
4  
5  
6 59 related quality of life

## 8 60 **STRENGTHS AND LIMITATIONS OF THIS STUDY**

- 10 61 • Inclusion of paediatric patients' perspectives.
- 12 62 • Integration of patients' and caregivers' perspectives to that of retinologists and hospital-  
14 63 based multidisciplinary professionals.
- 16 64 • Participants did not equally represent the geographical areas of Italy.
- 18 65 • Restrictions due to Sars-CoV-2 pandemic impacted the number of patients visiting the clinics,  
19  
20 66 so involved healthcare professionals had to engage them virtually.
- 22 67 • Patients and caregivers participated in the project on a voluntary basis, and Sars-CoV-2  
23 68 pandemic could have created a bias on the motivation to join the research.

## 25 69 **INTRODUCTION**

27  
28 70 Affecting about 1 in 2-3,000 people globally [1], Inherited Retinal Disorders (IRDs) constitute a group  
29  
30 71 of clinically and genetically heterogeneous degenerative conditions in which gene mutations affect  
31  
32 72 the proteins necessary to functional vision [2]. A progressive loss of photoreceptor cells and an  
33  
34 73 impairment for visual function characterise the IRDs related to mutations involving the gene  
35  
36 74 encoding the retinal pigment epithelium 65kD protein (*RPE65*) and gradually lead to an irreversible  
37  
38 75 visual decline [3], and potentially to blindness [4]; Leber congenital amaurosis (LCA) and retinitis  
39  
40 76 pigmentosa (RP) represent the most common forms [5,6].

42  
43  
44  
45 77 Age of onset ranges from early childhood to middle age; visual impairment at low light levels, night  
46  
47 78 blindness and nystagmus are the early symptoms, followed by an increasing deterioration of visual  
48  
49  
50 79 acuity and peripheral vision [7]. While gene therapy represents a promising scenario for treating  
51  
52 80 these conditions [3,8], IRDs management has been mainly support-oriented and focused on  
53  
54  
55 81 monitoring, counselling, and education [3].

56  
57 82 *RPE65*-related IRDs significantly impact patients in daily activities [9], with implications for their  
58  
59  
60 83 sense of identity [10] and autonomy management [11]; previous studies associate visual impairment

1  
2  
3 84 with lower social engaging ability [12], self-confidence and vision-related quality of life (VRQoL) [13],  
4  
5  
6 85 as well as with higher levels of depression [14,15].  
7  
8 86 Against this backdrop, other studies and reviews [16,17] suggest that a holistic and multidisciplinary  
9  
10 87 approach – also addressing IRDs emotional and social aspects – is crucial to support patients and  
11  
12  
13 88 their caregivers.  
14  
15 89 The World Health Organisation (WHO) has acknowledged narrative research as informative to  
16  
17  
18 90 address the illness experience [18] in leading clinical practice [19]; a keen focus on narratives  
19  
20 91 resulted in better patient care also in clinical genetics practice [20]. As described in similar studies  
21  
22  
23 92 [21], Narrative Medicine (NM) is based on illness narratives [22] and aims to integrate the *disease-*  
24  
25 93 centred approach, related to the biomedical sphere, with the *illness-* and *sickness-*centred  
26  
27  
28 94 approaches, focusing on the individual and social experience of a condition [23], respectively. NM  
29  
30 95 addresses the possible interventions on a specific disorder by integrating the perspectives of all the  
31  
32  
33 96 actors involved in the care pathway [24], and its findings have been increasingly used to improve  
34  
35 97 the quality of care in clinical practice [25,26].  
36  
37 98 The NM project “BIRDS – The Beat of IRD Stories” investigated the RPE65-related IRDs illness  
38  
39  
40 99 experience through the analysis of narratives (a) to reveal the practical, emotional, and social issues  
41  
42 100 linked to these conditions as experienced by patients, caregivers, and healthcare professionals, and  
43  
44  
45 101 (b) to understand the patient’s journey and expectations regarding the gene therapy, to finally  
46  
47 102 provide insights to foster the knowledge on RPE65-related IRDs and clinical practice.  
48  
49  
50 103 The present research article focuses on the first goal (a); another study addressed the second one  
51  
52 104 [27]. Although other studies integrated the perspectives of both patients and caregivers [28, 29], to  
53  
54  
55 105 the best of our knowledge, this is the first project that also engages the retinologists and hospital-  
56  
57 106 based multidisciplinary professionals (MDTs) in investigating the RPE65-related IRDs illness  
58  
59 107 experience in Italy.  
60

1  
2  
3  
4  
5  
6  
7  
8  
9  
10  
11  
12  
13  
14  
15  
16  
17  
18  
19  
20  
21  
22  
23  
24  
25  
26  
27  
28  
29  
30  
31  
32  
33  
34  
35  
36  
37  
38  
39  
40  
41  
42  
43  
44  
45  
46  
47  
48  
49  
50  
51  
52  
53  
54  
55  
56  
57  
58  
59  
60

## 108 **METHODS**

### 109 **Research design and setting**

110 The project was conducted in Italy between July and December 2020 and targeted paediatric and  
111 adult patients with an RPE65-related IRD, their caregivers, retinologists and MDT professionals  
112 involved in their care pathway. Participants were enrolled from five eye clinics specialised in IRDs  
113 (Supplementary file 1) across Italy. In July 2020, the Steering Committee – composed of five  
114 retinologists working in these centres and a Patient Association (PA) member – participated in an  
115 online meeting conducted by researchers from Istituto Studi Direzionali (ISTUD), Healthcare Area to  
116 be trained in NM and to discuss the project's goals and design; the Steering Committee, together  
117 with other IRD specialists from these centres, were then invited to engage patients and caregivers  
118 in participating in the research by accessing the project's webpage  
119 <http://www.medicinanarrativa.eu/birds>.

120 A clinical RPE65-related IRD diagnosis, without a minimum length of follow-up time post-diagnosis,  
121 or the caregiving of a person with an RPE65-related IRD constituted the eligibility criteria for patients  
122 and caregivers, as well as the willingness to share their illness experience; however, the ability to  
123 write or communicate in Italian was critical for the inclusion.

### 124 **Data collection**

125 Researchers followed the Web Content Accessibility Guidelines (WCAG) 2.1 [30] to ensure survey  
126 accessibility. Patients were invited to share their narratives either by writing or recording an audio  
127 file; also, caregivers were allowed to support paediatric patients in writing their narratives following  
128 the project's data collection tools. Narratives were anonymously collected through the Alchemer  
129 platform, available on the project's webpage. Afterwards, raw narratives were downloaded as  
130 Microsoft Excel spreadsheets.

1  
2  
3 131 A sociodemographic survey and an illness plot [31], namely, a plot related to the illness experience,  
4  
5  
6 132 were addressed to patients and caregivers; evocative and open words characterised the illness plot  
7  
8 133 to facilitate individual expression [32] and chronologically guide the narrative to identify changes  
9  
10  
11 134 over time. The retinologists' caring experience was gathered through the parallel chart [33], i.e., a  
12  
13 135 personal notebook, parallel to the clinical one, in which to write down thoughts and feelings in a  
14  
15 136 plain language [34]. The patients described in parallel charts could not coincide with patients  
16  
17  
18 137 participating in the project. Overall, these investigation tools (Supplementary file 2) addressed two  
19  
20 138 common aspects: (a) the personal and social experience of RPE65-related IRDs from early symptoms  
21  
22  
23 139 onwards, and (b) the VRQoL perception and the current daily life with RPE65-related IRDs.  
24  
25 140 Furthermore, in-depth interviews [35] were conducted with MDT professionals involved in IRD care  
26  
27  
28 141 pathway and a PA member, caregiver of a person with an RPE65-related IRD, to facilitate the  
29  
30 142 emergence of patient- and care pathway- related issues further and to delve into organisational  
31  
32  
33 143 aspects without proposing to these professionals the introspective experience of writing; the  
34  
35 144 interviewees approved the transcripts before the analysis.  
36  
37 145 The investigation tools were designed by two ISTUD researchers with different academic  
38  
39  
40 146 backgrounds and reviewed by the Steering Committee to reduce any cognitive bias.

#### 41 42 147 **Patient and public involvement**

43  
44  
45 148 Researchers did not engage patients and caregivers in (a) developing the research design and tools,  
46  
47 149 (b) interpreting and discussing the results, and (c) contributing to the writing or editing of this  
48  
49  
50 150 document.

#### 51 52 151 **Ethical considerations**

53  
54 152 The project was performed according to the Declaration of Helsinki. Participants provided their web-  
55  
56  
57 153 based informed consent before their involvement and after being briefed on the project purposes  
58  
59 154 and personal data processing procedures, according to the General Data Protection Regulation of  
60

1  
2  
3  
4  
5  
6  
7  
8  
9  
10  
11  
12  
13  
14  
15  
16  
17  
18  
19  
20  
21  
22  
23  
24  
25  
26  
27  
28  
29  
30  
31  
32  
33  
34  
35  
36  
37  
38  
39  
40  
41  
42  
43  
44  
45  
46  
47  
48  
49  
50  
51  
52  
53  
54  
55  
56  
57  
58  
59  
60

155 the European Union 2016/679 [36] and the Italian Law 196/2003 [37]. Furthermore, the IRD  
156 specialists involved obtained a written informed consent from the parents of paediatric patients  
157 during the first briefing on the project methods and purposes.

158 The Ethical Committee of the Luigi Vanvitelli University Hospital (Naples, Italy) approved the project  
159 in September 2020 (protocol ID 20964/2020).

## 160 **Analysis**

161 Researchers analysed the sociodemographic data through descriptive statistics; answering survey  
162 questions or filling in fields in the illness plots and parallel charts was not mandatory, so sample size  
163 may vary. Narratives were entered into Nvivo software [38] for coding and content analysis [39].

164 Three narratives for each group and one in-depth interview were collectively coded to assess the  
165 consistency across team members; then, each narrative and in-depth interview were separately  
166 coded and reviewed during weekly peer debriefings to limit any interpretation bias.

167 Open interpretive coding was employed to identify and analyse the emerging contents in all  
168 narratives and in-depth interviews. Moreover, adult patients' and caregivers' narratives and parallel  
169 charts were classified following: (a) Kleinman's classification [23], which identifies *disease-*, *illness-*,  
170 and *sickness*-related aspects in narratives, respectively concerning the biomedical description of a  
171 condition, its personal and emotional experience, and its social and cultural perception; (b) Bury's  
172 classification [40], which distinguishes among *contingent narratives* (concerning a condition's  
173 immediate effects on daily life), *core narratives* (connecting the illness experience to deeper and  
174 cultural levels of meaning) and *moral narratives* (highlighting an evaluative and social dimension).

175 Researchers did not apply retrospective classifications of narratives to paediatric patients'  
176 narratives since their caregivers' in-writing support could have affected the narrative style and the  
177 word choice.



1  
2  
3 178 Researchers asked the participants to describe RPE65-related IRDs through a metaphor to trace  
4  
5  
6 179 spontaneous meaning associations related to the illness experience through daily language [41].  
7  
8 180 The Steering Committee discussed the results to address the emerged issues and data interpretation  
9  
10  
11 181 collectively. Researchers followed the Standards for Reporting Qualitative Research (SRQR)  
12  
13 182 guidelines [42].

## 15 183 RESULTS

18 184 Three paediatric and five early-onset adult patients and eight caregivers participated in the project,  
19  
20 185 as well as 11 retinologists specialised in IRDs, who wrote 27 parallel charts; all patients chose to  
21  
22  
23 186 share their experience in writing. In-depth interviews were conducted with five MDT professionals  
24  
25 187 – i.e., two genetic counselors, two psychologists and one orientation and mobility (O&M) instructor  
26  
27  
28 188 – and one PA member. Table 1 summarises the sociodemographic data of participants, including  
29  
30 189 non-responders as a separate category.

32  
33 **Table 1 – Sociodemographic data of participants**

|                             | Patients<br>(N=8) | Caregivers<br>(N=8) | Patients in<br>parallel charts<br>(N=27) | Retinologists<br>(N=11) | Participants in<br>in-depth<br>interviews<br>(N=6) |
|-----------------------------|-------------------|---------------------|------------------------------------------|-------------------------|----------------------------------------------------|
| <b>Gender</b>               |                   |                     |                                          |                         |                                                    |
| Female                      | 6 (75%)           | 6 (75%)             | 12 (44%)                                 | 5 (45%)                 | 5 (83%)                                            |
| Male                        | 2 (25%)           | 2 (25%)             | 15 (56%)                                 | 6 (55%)                 | 1 (17%)                                            |
| <b>Age (yrs)</b>            |                   |                     |                                          |                         |                                                    |
| Median (range)              | 26 (8-63)         | 44 (31-70)          | 17 (5-65)                                | 42 (32-64)              | 54 (49-67)                                         |
| <b>Geographic residence</b> |                   |                     |                                          |                         |                                                    |
| Northern Italy              | 3 (38%)           | 2 (24%)             | -                                        | -                       | 2 (33%)                                            |
| Central Italy               | 4 (50%)           | 4 (50%)             | -                                        | 8 (73%)                 | 4 (67%)                                            |
| Southern Italy              | 1 (12%)           | 1 (13%)             | -                                        | 3 (27%)                 | -                                                  |
| Non-responders              | -                 | 1 (13%)             | -                                        | -                       | -                                                  |
| <b>Education</b>            |                   |                     |                                          |                         |                                                    |
| Elementary school           | 1 (12%)           | -                   | 7 (26%)                                  | -                       | -                                                  |
| Middle school               | -                 | 1 (12%)             | 4 (15%)                                  | -                       | -                                                  |
| High school                 | 1 (12%)           | 3 (38%)             | 4 (15%)                                  | -                       | -                                                  |
| Bachelor/Master             | 3 (38%)           | 3 (38%)             | 3 (11%)                                  | -                       | -                                                  |
| Non-responders              | 3 (38%)           | 1 (12%)             | 9 (33%)                                  | -                       | -                                                  |
| <b>Employment status</b>    |                   |                     |                                          |                         |                                                    |
| Student                     | 4 (50%)           | -                   | 16 (59%)                                 | -                       | -                                                  |
| Working                     | 3 (38%)           | 6 (76%)             | 10 (37%)                                 | -                       | -                                                  |

|                                    |         |         |          |           |            |
|------------------------------------|---------|---------|----------|-----------|------------|
| Not working                        | -       | -       | -        | -         | -          |
| Retired                            | -       | 1 (12%) | 1 (4%)   | -         | -          |
| Non-responders                     | 1 (12%) | 1 (12%) | -        | -         | -          |
| <b>Marital state</b>               |         |         |          |           |            |
| Single                             | 6 (75%) | 1 (12%) | 18 (67%) | -         | -          |
| Married                            | 2 (25%) | 5 (64%) | 7 (26%)  | -         | -          |
| Separated                          | -       | 1 (12%) | 2 (7%)   | -         | -          |
| Non-responders                     | -       | 1 (12%) | -        | -         | -          |
| <b>Professional activity (yrs)</b> |         |         |          |           |            |
| Median (range)                     | -       | -       | -        | 16 (6-41) | 23 (19-35) |
| <b>Specialisation</b>              |         |         |          |           |            |
| Ophthalmology                      | -       | -       | -        | 8 (73%)   | 1 (17%)    |
| Paediatric ophthalmology           | -       | -       | -        | 1 (9%)    |            |
| Orthoptics                         | -       | -       | -        | 2 (18%)   |            |
| Medical Genetics                   |         |         |          |           | 1 (17%)    |
| O&M Training                       |         |         |          |           | 1 (17%)    |
| Psychology                         |         |         |          |           | 2 (32%)    |
| Other                              | -       | -       | -        | -         | 1 (17%)    |
| <b>Workplace</b>                   |         |         |          |           |            |
| Hospital                           | -       | -       | -        | 2 (18%)   |            |
| University                         | -       | -       | -        | 9 (82%)   | 2 (33%)    |
| Hospital                           |         |         |          |           |            |
| Other                              |         |         |          |           | 4 (67%)    |

*Data are presented as n(%) or median (range).*

Results are presented along four main lines: (a) the RPE65-related IRDs experience analysed through narrative classifications and metaphors; (b) the emotional issues before and upon the clinical diagnosis; (c) VRQoL perception, the condition's impact on daily life and participants' expectations; (d) insights from in-depth interviews. Narratives informed (a) and (b), while (c) was investigated through both narratives and quantitative data from the survey; in-depth interviews alone informed (d). Figures 1-3 and Tables 2-5 provide quotes from the narratives, while four narratives are available in English in Supplementary file 3; we reduced the risk of re-identification by applying different codes from those used to identify participants during data collection.

### **The RPE65-related IRDs experience in the narratives**

Overall, almost all classified narratives highlighted illness-related aspects [23] (Figure 1); adult patients' narratives lacked a clinical language, which conversely characterised 63% of the caregivers' narratives and 37% of the parallel charts. Sickness-related issues were present in 50% of the

1  
2  
3 203 caregivers' narratives and in 11% of the parallel charts, while they emerged in all adult patients'  
4  
5  
6 204 narratives.

7  
8 205 [Figure 1]

9  
10 206 Core narratives [40] prevailed in parallel charts (74%) and were equally reported (50%) as moral  
11  
12  
13 207 narratives by caregivers (Figure 2); only parallel charts presented contingent narratives (11%). Moral  
14  
15 208 narratives were prevalent among adult patients (60%), while discomfort, disbelief (particularly at  
16  
17  
18 209 school) and the search for independence represented three spontaneously emerged issues in all  
19  
20 210 narratives.

21  
22  
23 211 [Figure 2]

24  
25 212 Metaphors were clustered into four thematic groups (Figure 3): (a) those referring to light and hope,  
26  
27  
28 213 used by patients (33%) and in parallel charts (15%); (b) those concerning limitations and impairment,  
29  
30 214 equally reported (50%) by patients and caregivers; (c) those related to darkness and mist, used by  
31  
32  
33 215 caregivers (33%) and in parallel charts (40%); (d) and metaphors denoting pain and isolation, almost  
34  
35 216 equally used by patients and caregivers, and in parallel charts.

36  
37 217 [Figure 3]

### 38 39 40 218 **Emotional issues upon the clinical diagnosis and the clinical encounter**

41  
42 219 Patients reported having had the first signs of visual impairment at two years and three months of  
43  
44  
45 220 age (median value; range 0,5-6). In narratives, all patients reported issues that arose during early  
46  
47 221 childhood, and that their parental caregivers identified as critical, e.g., being attracted by light  
48  
49  
50 222 sources or tripping (*In the evening, my parents used to cover the kitchen lamp, otherwise I would*  
51  
52 223 *spend hours just staring at it, Patient 002*). As shown in Table 2, patients described early living with  
53  
54  
55 224 an RPE65-associated IRD either as uncomfortable (62%), mainly referring to the feeling of "being  
56  
57 225 wrong", caused by the informal tests or eye examinations they were subjected to by their parents,  
58  
59 226 or – conversely – normal (38%), since they did not have any standard of comparison to evaluate  
60

227 their sight. Caregivers reported having felt worried (50%) or helpless (50%) in the same years. During  
 228 the communication of the clinical diagnosis, 71% of patients had no reaction, while the other 29%  
 229 reported that it allowed them to identify their condition; conversely, parental caregivers (75%) felt  
 230 hopeless, while partner caregivers (25%) reported concern for the hereditariness of the condition.

**Table 2 – Patients' and caregivers' emotions before and at the diagnosis of RPE65-related IRD**

|                         |                       | Patients                                                                                                                                                                                                                                                                                                                                                |
|-------------------------|-----------------------|---------------------------------------------------------------------------------------------------------------------------------------------------------------------------------------------------------------------------------------------------------------------------------------------------------------------------------------------------------|
| <b>Before diagnosis</b> | Normal (38%)          | <i>– I have always felt normal. I never had the feeling that the slight differences I noticed could be a problem, or part of a problem. (Patient 004)</i>                                                                                                                                                                                               |
|                         | Uncomfortable (62%)   | <i>– I felt their disappointment, their concern... They were not happy with me, and I felt wrong, because my answers were wrong. I couldn't see, and I couldn't help but guess... (Patient 002)</i>                                                                                                                                                     |
| <b>At diagnosis</b>     | Identification (29%)  | <i>– Somehow, finally identifying the problem brought me out of my limbo: for years, I had been the child who saw little during the day and who couldn't see at night; now I finally knew why. I became familiar with terms such as "blindness", "low vision", or "disability", concepts that would later radically change my future. (Patient 001)</i> |
|                         | Neutral (71%)         | <i>– Honestly, I wasn't much affected. The disease has always been part of me. I grew up with it, I gradually got used to it. (Patient 004)</i>                                                                                                                                                                                                         |
|                         |                       | Caregivers                                                                                                                                                                                                                                                                                                                                              |
| <b>Before diagnosis</b> | Worry 50%             | <i>– I felt helpless, terrified, and afraid. (Caregiver 003)</i>                                                                                                                                                                                                                                                                                        |
|                         | Helplessness 50%      | <i>– I felt terrible, because I understood the challenge, but I couldn't do much, except hold her hand. (Caregiver 006)</i>                                                                                                                                                                                                                             |
| <b>At diagnosis</b>     | Hopelessness 75%      | <i>– I felt terrible. It's something you don't expect: a hereditary disease of a genetic nature in a family where there were no known cases seems impossible. (Caregiver 008)</i>                                                                                                                                                                       |
|                         | Fear for children 25% | <i>– In the beginning, it scared me: the fear that our other children could suffer from a similar condition. Our anxiety decreased with time: I saw her, I saw she was restricted but not blocked, which gave me courage. (Caregiver 005)</i>                                                                                                           |

232 Table 3 summarises the clinicians' feelings the first time they met their patients and at the beginning  
 233 of the care pathway. During the first visit, 37% of parallel charts reported the thought that the path  
 234 would have been challenging, while 30% reported hopefulness over the care options; conversely,  
 235 22% focused on a sense of sorrow for the patient, and 11% on the empathy with patients or  
 236 caregivers. At the beginning of the care relationship, clinicians felt on one side emotionally involved

237 or motivated to do their best (58%), and on the other side helpless (30%) or “guilty” for being in a  
 238 privileged situation compared to the patient (12%).

**Table 3 – Retinologists’ emotions at first visit and at the beginning of the care relationship**

|                                           |                                                |                                                                                                                                                                                                                                                                                                                                                                                                                                                                                                            |
|-------------------------------------------|------------------------------------------------|------------------------------------------------------------------------------------------------------------------------------------------------------------------------------------------------------------------------------------------------------------------------------------------------------------------------------------------------------------------------------------------------------------------------------------------------------------------------------------------------------------|
| At the first visit                        | A challenge for both clinician and patient 37% | – I thought that this visit was a challenge for us both: for her, it meant undergoing new tests and knowing the results; for me, it meant dedicating myself to another person to whom I could dedicate my care. I also thought that she might have access to treatment in the future, and I was ready and willing to facilitate this. (Parallel chart 007)                                                                                                                                                 |
|                                           | Hope 30%                                       | – I thought it was essential to follow her carefully from a clinical perspective, and that it was imperative to have a genetic test. When she showed it to me, I realized that she had a treatable mutation, which gave me hope. (Parallel chart 015)                                                                                                                                                                                                                                                      |
|                                           | Sorrow 22%                                     | – Poor child, he is not living his life like his healthy peers. (Parallel chart 002)                                                                                                                                                                                                                                                                                                                                                                                                                       |
|                                           | Empathy with patient or caregiver 11%          | – I thought that he was the same age as me, but that he had a completely different visual situation from mine. I stepped out of the treating doctor’s shoes, and I found myself projected into an essentially human dimension. I put myself in her shoes and listened to her story with my heart as well as my ears. (Parallel chart 006)                                                                                                                                                                  |
| At the beginning of the care relationship | Emotional involvement and motivation 58%       | – I was impressed by what I was seeing, powerless but at the same time full of motivation and hope. I knew the child’s mutation, and I imagined that – given his young age – he might have a therapeutic chance. I leveraged this last point in my talk with his parents, trying to give them a cautious hope and making them understand that this specific genetic mutation meant being severely visually impaired, but also the possibility of being cured in a not distant future. (Parallel chart 005) |
|                                           | Helplessness 30%                               | – Despite my knowledge, I felt powerless, unable to give immediate and concrete answers to many of his practical problems. (Parallel chart 019)                                                                                                                                                                                                                                                                                                                                                            |
|                                           | Sense of guilt 12%                             | – I felt ashamed... I’m lucky, I think I have a successful life, and yet I often get irritated or discouraged by stupid things, while he always seems happy to live his life, despite everything. (Parallel chart 021)                                                                                                                                                                                                                                                                                     |

239

240 In addition, 33% of the parallel charts highlighted the importance of showing empathy from the very  
 241 beginning of the care relationship.

242 As for the currently living with an RPE65-related IRD (Table 4), patients reported a sense of  
 243 uncertainty (25%), due to increasing visual impairment, or discomfort and sadness (25%);  
 244 conversely, 50% reported to feel serene or hopeful, also considering the possibility of undergoing  
 245 gene therapy. Caregivers declared to have accepted the condition (38%) and to live more serenely  
 246 (62%), due to the awareness of having done their best. In parallel charts, clinicians reported positive  
 247 feelings (44%), dedication (37%), and motivation (19%) toward patients.

**Table 4 – The current feelings of participants: distribution and quotes from narratives**

| Patients                       |                                                                                                                                                                                                                                                                                                                                                                                                                                                                                                                                                                                                                                                    |
|--------------------------------|----------------------------------------------------------------------------------------------------------------------------------------------------------------------------------------------------------------------------------------------------------------------------------------------------------------------------------------------------------------------------------------------------------------------------------------------------------------------------------------------------------------------------------------------------------------------------------------------------------------------------------------------------|
| <b>Uncertainty 25%</b>         | – Today I feel poised between light and shadow. I feel like someone who chases a ball without ever reaching it. I am 42 years old, and I have spent my life being told that science works miracles, and that life is long, and that progress for me will come soon. I am 42, though, not 10... My sight is progressively worsening. I feel tangible differences over a few months, days in some cases. I can remember things from a few months ago, visual details that I no longer see today. In fact, it's not that I don't see them: I perceive them as covered by a veil. Glossy... Like old photographs, but far less poetic... (Patient 001) |
| <b>Discomfort, sadness 25%</b> | – I feel sad: when mum or dad are driving, in the afternoon or in the evening, I do not see the road, I only notice a few lampposts. (Patient 007)                                                                                                                                                                                                                                                                                                                                                                                                                                                                                                 |
| <b>Serenity, hope 50%</b>      | – Today I feel hopeful for the future. I try every day to accept my challenges and to live with serenity. If the situation gets worse, I know that I will have to find different ways. It will be hard, maybe even unpleasant, but it will be possible. If the situation improves, thanks to gene therapy, I will be pleased. (Patient 002)                                                                                                                                                                                                                                                                                                        |
| Caregivers                     |                                                                                                                                                                                                                                                                                                                                                                                                                                                                                                                                                                                                                                                    |
| <b>Acceptance 38%</b>          | – I feel I am an integral part of my son's life. I live in symbiosis with him. Everything is more manageable: I manage to find solutions quite easily to meet his needs during his constant difficulties. Let's say that everything is always about having an obstacle to overcome... It's never easy, and sometimes it's mentally exhausting. (Caregiver 003)                                                                                                                                                                                                                                                                                     |
| <b>More serenity 62%</b>       | – I know that we are doing our best to understand her condition better and, if possible, to start the therapy. The knowledge that we are doing our best brings me serenity. (Caregiver 005)                                                                                                                                                                                                                                                                                                                                                                                                                                                        |
| Retinologists                  |                                                                                                                                                                                                                                                                                                                                                                                                                                                                                                                                                                                                                                                    |
| <b>Positive feelings 44%</b>   | – I'm feeling comfortable. Able to do my job without hiding my human side. Open to questions and ready to give competent and precise answers. Willing to help but aware of my limits, my role, and my possibilities. (Parallel chart 006)                                                                                                                                                                                                                                                                                                                                                                                                          |
| <b>Commitment 37%</b>          | – I feel obliged to give him what he hasn't had so far. (Parallel chart 012)                                                                                                                                                                                                                                                                                                                                                                                                                                                                                                                                                                       |
| <b>Motivation 19%</b>          | – I realize that it is a mutual gift. It reassures me to see her grow strong and able to face tomorrow despite her condition. I feel good with her, comforted by her positive attitude. (Parallel chart 010)                                                                                                                                                                                                                                                                                                                                                                                                                                       |

**VRQoL perception and daily living with RPE65-related IRDs**

Supplementary file 4 presents survey data on patients' and caregivers' evaluation of RPE65-related IRDs impact on patients and their day-to-day tasks in relation to low light conditions; Figure 4 provides an overview of essential data.

[Figure 4]

Patients reported an increasing impact on main daily activities after sunset; thus, they referred both a severe impact on driving (100%) and cooking (100%), and no impact on the use of smartphones (86%) regardless of light conditions. Caregivers reported higher levels of limitation for patients in

1  
2  
3 257 some activities even before sunset, such as reading, using digital tools or smartphones, washing,  
4  
5  
6 258 moving around; however, they reported fewer limitations in driving and cooking before sunset  
7  
8 259 (100% *partially limited*). Considering an open coding of VRQoL domains in patient narratives, the  
9  
10  
11 260 limitation in activities was the prevalent issue, concerning 100% of patients' narratives. Mobility  
12  
13 261 limitation (*–The city becomes more and more hostile. I am afraid of tripping, bumping into things,*  
14  
15 262 *hurting myself, taking a wrong turn, being followed, and having to flee from a danger without being*  
16  
17  
18 263 *able to do so, Patient 001*), health concerns (*–I am sad and cry. I ask my mother if my eyes will ever*  
19  
20 264 *be able to see well, Patient 007*) and emotional well-being issues (*–I cannot accept that I cannot do*  
21  
22  
23 265 *many things anymore, and I cannot admit that this leads me to close myself off, Patient 006*)  
24  
25 266 emerged in 75% of patients' narratives.  
26  
27  
28 267 Nevertheless, further survey data showed that 72% of patients considered their VRQoL good, and  
29  
30 268 14% excellent (Figure 5); thus, they reported that RPE65-related IRDs have enough impact on the  
31  
32  
33 269 performance of their daily activities (83%). Fifty percent of caregivers defined their patient's VRQoL  
34  
35 270 acceptable, and only 38% good; conversely, 30% and 14% reported that RPE65-related IRDs have a  
36  
37 271 low – or no – impact on patients' performance of daily activities, respectively.  
38  
39  
40 272 [Figure 5]  
41  
42 273 Addressing future perspectives, 71% of patients reported their hope to live serenely, both within  
43  
44  
45 274 their family and in the social context (*–I just want my loved ones to see me calm and serene. [...] I*  
46  
47 275 *could not bear to see my relatives feeling bad for me, Patient 006*), and 29% their hope to receive  
48  
49  
50 276 gene therapy (*–Thinking about tomorrow, I would like to receive gene therapy, Patient 002*);  
51  
52 277 caregivers also stated to await gene therapy (50%). Clinicians hope to maintain a high quality of care  
53  
54  
55 278 in 41% of parallel charts, to improve their interpersonal skills and therapeutic possibilities for  
56  
57 279 patients in 37%, and to be able to give them real hope in 22% (*–Sometimes I think that gene therapy*  
58  
59  
60

1  
2  
3 280 *has already become a reality, and I feel that I am living a surreal experience. [...] I wish that what I*  
4  
5  
6 281 *perceive as surreal today soon becomes reality, Parallel chart 007).*

7  
8 282 Overall, participants described writing as a positive experience: 80% of patients reported that  
9  
10 283 narrative was a positive experience, and 20% stated to have felt a sense of freedom in sharing the  
11  
12 284 illness experience. Twenty-seven percent of the caregivers' narratives and 21% of the parallel charts  
13  
14  
15 285 reported to consider it useful to raise awareness about these conditions; however, they also  
16  
17  
18 286 highlighted negative feelings, such as fatigue or sadness, in 14% and 8% of cases, respectively.

### 20 287 **Insights from in-depth interviews**

21  
22  
23 288 Five macro-themes transversely emerged from the in-depth interviews with MDT professionals and  
24  
25 289 PA member (Table 5):

26  
27  
28 290 (a) The O&M instructor described the gap occurring between early-onset patients, who can  
29  
30 291 develop compensatory strategies over time, and adult-onset patients, more likely to lose  
31  
32 292 their previous visual experience. Thus, early-onset patients may experience their sight as  
33  
34  
35 293 "normal"; in this sense, the psychologists highlighted the importance to psychologically  
36  
37 294 support patients upon the communication of the clinical diagnosis, when introducing the  
38  
39  
40 295 notion of "impairment".

41  
42 296 (b) According to all interviewees, psychological support should be provided throughout the care  
43  
44  
45 297 pathway to improve communication and avoid misleading messages that could make  
46  
47 298 patients feel that they "could do nothing more". Furthermore, as also maintained by the  
48  
49  
50 299 genetic counselors and the PA member, a more careful communication would allow the  
51  
52 300 patient to keep an active perspective on the care pathway and early address rehabilitation  
53  
54 301 programs.

55  
56  
57 302 (c) All interviewees addressed the RPE65-related IRDs impact on parental and partner  
58  
59 303 caregivers. While the latter may face a couple crisis due to the progression of the  
60



- 1  
2  
3 304 impairment, the former often deal with the failure of the “perfect child” dream, the hope  
4  
5  
6 305 that their children will heal and a strong sense of guilt for the inheritability of the condition.  
7  
8 306 Since caregivers project these complex feelings on patients, potentially impacting their care  
9  
10  
11 307 pathway, a psychological support should be provided to help them accept this condition.  
12  
13 308 (d) All interviewees highlighted the lack of knowledge of IRDs among the general public and  
14  
15 309 society. The O&M instructor stressed that the link between visual impairment and changing  
16  
17  
18 310 light conditions is challenging for those who do not know these diseases. The psychologists  
19  
20 311 confirmed that this is also critical in the school environment. One psychologist and the PA  
21  
22  
23 312 member mentioned the need to create an IRDs “culture” and to address the diversity issue.  
24  
25 313 (e) Furthermore, one psychologist focused on the need for investigation tools integrating  
26  
27  
28 314 quantitative questionnaires to address the interpersonal dimension of daily activities,  
29  
30 315 especially after sunset or in low light conditions.  
31

32 **Table 5 – Macro-themes reported by MT professionals and PA representative interviewed:**  
33 **quotes from in-depth interviews**

|                                                     |                                                                                                                                                                                                                                                                                                                                                                                                                                                                                                                                                                                                                                                                                                                                                                                                                                                                                                                                                                                                                                                                                                                                                                                                                                                                                       |
|-----------------------------------------------------|---------------------------------------------------------------------------------------------------------------------------------------------------------------------------------------------------------------------------------------------------------------------------------------------------------------------------------------------------------------------------------------------------------------------------------------------------------------------------------------------------------------------------------------------------------------------------------------------------------------------------------------------------------------------------------------------------------------------------------------------------------------------------------------------------------------------------------------------------------------------------------------------------------------------------------------------------------------------------------------------------------------------------------------------------------------------------------------------------------------------------------------------------------------------------------------------------------------------------------------------------------------------------------------|
| <b>Managing IRDs</b>                                | <p>35 – <i>In some people, the degenerative process begins during adulthood. They</i><br/>36 <i>“unconsciously” erase all their previous visual experiences: it’s a psychological reaction</i><br/>37 <i>to the condition. Thus, they really need a “carer” because they can no longer do anything.</i><br/>38 <i>Their mind forgets and cannot retrieve all the skills they possessed before from their store</i><br/>39 <i>of experiences. On the other hand, in children who are used to this type of vision from an</i><br/>40 <i>early age, visual function adapts, even if it gradually diminishes. They can create</i><br/>41 <i>compensatory strategies more quickly, even if, while working on it, we realize that their</i><br/>42 <i>visual acuity or visual field have worsened. (Interviewee 002)</i></p>                                                                                                                                                                                                                                                                                                                                                                                                                                                                |
| <b>Communication of the diagnosis</b>               | <p>43<br/>44 – <i>[...] Colleagues who are not familiar with this condition are sometimes caught off guard.</i><br/>45 <i>In the past, there have been communication issues. [...] Over the years, I have seen</i><br/>46 <i>everything: from diagnoses not being communicated even when clear and evident, to</i><br/>47 <i>children being told to learn Braille. Sometimes prognoses were communicated incorrectly;</i><br/>48 <i>patients perceived them as crude, or they were told not to have children, because they</i><br/>49 <i>would all be suffering from the same condition. (Interviewee 001)</i><br/>50<br/>51 – <i>We still have situations where the diagnosis is communicated violently: unfortunately,</i><br/>52 <i>there is no cure for the disease, blindness could occur, but we do not know when... Verbal</i><br/>53 <i>violence is where any kind of hope is taken away. [...] The main issue after the diagnosis is</i><br/>54 <i>the psychological one. Suppose the diagnosis is communicated together with the</i><br/>55 <i>possibility of recuperation, in which case one can deal with it somehow; but if it is</i><br/>56 <i>expressed without this possibility, people don’t even undergo check-ups anymore.</i><br/>57 <i>(Interviewee 004)</i></p> |
| <b>Attention to partner and parental caregivers</b> | <p>58 – <i>Some couples, [...] when they discovered the condition experienced a crisis. [...] What I</i><br/>59 <i>noticed is that the way a caregiver treats his/her partner changes a lot: It’s more</i><br/>60 <i>imperative (Interviewee 002)</i></p>                                                                                                                                                                                                                                                                                                                                                                                                                                                                                                                                                                                                                                                                                                                                                                                                                                                                                                                                                                                                                             |

1  
2  
3  
4  
5  
6  
7  
8  
9  
– A parent cannot serenely accept the condition of a child. Mothers are confronted with this issue daily, i.e., they are considered “good mothers” if they can accept it, and this translates into the thought “I am not a good mother, I will not be a good mother”. [...] These parents often call the child “sick”. Disability is not a disease, but a condition. In pregnancy, parents expect to have a “healthy” child: the hope is to regain this healthy child, even when it is objectively impossible. (Interviewee 003)

10  
11  
12  
13  
14  
15  
16  
17  
18  
19  
– In terms of daily life, people with this condition experience uncertainty, which is not even daily, but hourly. They may not see the same things at 10:00 and 10:30 am, because of a series of parameters that come into play: size, permanence, brightness, which give the retina a different visual function. So, this uncertainty generates other insecurities, and often triggers profound depressive states. This is not understood by other people. Often, at school, teachers do not understand how the child could see the blackboard at the beginning of the lesson and not at the end. The explanation is evident to those who know these disorders: maybe the sun’s angle had changed, of fatigue may come in to play, together with a series of parameters that determine a visual loss. (Interviewee 002)

20  
21  
22  
23  
– I believe that initiatives are needed to allow people gain experience. For children, we could think of initiatives in school, which should be carried out regardless of the presence in the class of a child with this condition. We need to create a “culture” [...], a culture of confrontation with diversity. (Interviewee 003)

24  
25  
26  
27  
28  
29  
– The dimension of being with others is entirely missing: all activities are investigated as if they were carried out by the person alone, but rarely people with this condition are alone, especially after sunset. (Interviewee 003)

**Lack of knowledge of IRDs**

**New investigation tools**

30 **DISCUSSION**

31  
32 318 The project represents the first effort to investigate RPE65-related IRDs in Italy through NM,  
33  
34  
35 319 simultaneously addressing the perspectives of patients, caregivers and treating retinologists and  
36  
37 320 collecting insights from MDT professionals and PA members.

38  
39 321 The co-presence of *illness*- and *sickness*-related aspects [23] and the lack of a clinical language in  
40  
41  
42 322 patient narratives highlighted the centrality of the personal and social dimensions of living with an  
43  
44 323 RPE65-related IRD in narrating the illness experience and trying to make sense [10] of the condition;  
45  
46  
47 324 the prevalence of moral narratives [40] supports this suggestion. The employed classifications  
48  
49 325 allowed related themes to emerge in narratives spontaneously: patients declared to have  
50  
51  
52 326 manifested the first signs of visual impairment during early childhood and reported a discomfort  
53  
54 327 mainly due to the informal testing they were subjected to by their parents, together with repeated  
55  
56  
57 328 eye examinations, before the clinical diagnosis; at school, their visual impairment is misunderstood  
58  
59 329 or questioned by their teachers, who are not aware of the relationship between visual impairment  
60

1  
2  
3 330 and changing light conditions. In-depth interviews confirm the lack of knowledge about IRDs among  
4  
5  
6 331 the general public and society, as well as at school, where patients also experience stigma [43] since  
7  
8 332 their visual issues are addressed like cognitive impairments. Further investigations on the school  
9  
10  
11 333 environment may integrate studies on the patients' discrimination at their workplace [44] and  
12  
13 334 studies on the patients' feeling of being often patronised [10].

15 335 Early-onset patients perceive their sight as "normal", finding out to be "impaired" only after the  
16  
17  
18 336 clinical diagnosis or by interacting with their peers in the school environment. As emerged from the  
19  
20 337 in-depth interviews, the notion of "impairment" should be carefully introduced to support the  
21  
22  
23 338 patients' awareness of their condition. This issue may be further explored and integrated with  
24  
25 339 studies on making sense and coping with IRDs [10, 12], while careful communication should be  
26  
27  
28 340 adopted throughout the care pathways.

30 341 The search for autonomy emerges as related to the health concerns for the progressive sight loss  
31  
32  
33 342 and the emotional well-being issues showing anxiety for the future. Findings confirm that RPE65-  
34  
35 343 related IRDs significantly impact patients' VRQoL in terms of activity and mobility limitations: while  
36  
37 344 changing light conditions do not change the use of digital tools or smartphones, activities such as  
38  
39  
40 345 driving and cooking remain challenging, regardless of the light conditions; moreover, the capability  
41  
42 346 to perform daily activities is compromised by low light conditions, as also shown in studies  
43  
44  
45 347 addressing IRD critical effects on lifestyle choices [11, 45]. Nonetheless, many patients reported  
46  
47 348 having a good VRQoL, suggesting that they have found strategies to cope with the condition in the  
48  
49  
50 349 absence, so far, of a therapeutic solution; these coping strategies should be further investigated.

52 350 Two considerations may be emphasised. On the one side, the narratives and survey data show  
53  
54  
55 351 misalignment between the patient's and the caregiver's perception of the former's limitation in  
56  
57 352 activities and in VRQoL, where patients report a higher perceived VRQoL, and conversely a lower  
58  
59 353 performance while carrying out daily tasks: we remark that patients' coping strategies may  
60

1  
2  
3  
4  
5  
6  
7  
8  
9  
10  
11  
12  
13  
14  
15  
16  
17  
18  
19  
20  
21  
22  
23  
24  
25  
26  
27  
28  
29  
30  
31  
32  
33  
34  
35  
36  
37  
38  
39  
40  
41  
42  
43  
44  
45  
46  
47  
48  
49  
50  
51  
52  
53  
54  
55  
56  
57  
58  
59  
60

354 represent a possible explanation and – at the same time – not visually impaired caregivers may have  
355 a different perception of IRD impact on patients’ life; however, this issue needs further  
356 investigations. On the other side, the search for autonomy is linked with the perception that relying  
357 on others is a limitation, confirming previous studies on this topic [11].

358 The metaphors used by patients to describe RPE65-related IRDs highlight not only limitations and  
359 pain, but also lights and hope. Conversely, the association with images recalling darkness emerges  
360 from caregiver narratives and parallel charts; in particular, caregivers do not use any positive image  
361 to describe RPE65-related IRDs.

362 In contrast with patients, caregiver narratives largely focus on *disease*-related aspects [23];  
363 however, the presence of *sickness*- and *illness*-related aspects suggests their emotional  
364 commitment to the patient’s well-being. Furthermore, moral narratives [40] reveal the sense of guilt  
365 experienced by caregivers about the hereditariness of the condition, which is also addressed within  
366 in-depth interviews: while partner caregivers may face a couple crisis upon the onset of the  
367 condition, parental caregivers experience the failure of the “perfect child” dream and struggle to  
368 accept the condition. Misalignment in the patients’ perception of their VRQoL, metaphors, and the  
369 emotional issues reported also suggest the complexity found by caregivers in coping with these  
370 conditions.

371 Parallel charts show that retinologists are personally and emotionally involved in the care  
372 relationship, as suggested by the prevalence of core narratives [40] and reported their feelings at  
373 the beginning of the care pathway, despite being less focused on social RPE65-related IRDs aspects.  
374 Retinologists emerge as being motivated to find the most suitable therapeutic pathway, as well as  
375 emotionally committed to patients; for the first time in similar NM projects, clinicians report a clear  
376 sense of guilt for being “healthy” compared to their patients.

1

2

3 377 These are only preliminary findings; however, they can provide initial insights on the importance of  
4  
5  
6 378 a multidisciplinary RPE65-related IRDs clinical practice:

7

8 379 (a) RPE65-related IRDs critically impact several quality-of-life domains, while the emotional  
9  
10 380 aspects of RPE65-related IRDs emerge as crucial while making sense of the condition and  
11  
12 during the clinical encounter: the tension between the individual and the social dimensions  
13 381 of these conditions emerged as informative of the care pathway challenges and real-life  
14  
15 382 experiences, and may be better addressed through new investigation tools, as claimed by  
16  
17 383 the in-depth interviews. The NM approach has proved suitable for this purpose since sharing  
18  
19 the illness experience by writing allows for more introspective and reflective knowledge, that  
20 384 may integrate the one-to-one level of in-depth interviews used in researching the living with  
21  
22 a certain condition.  
23 385  
24  
25 386  
26  
27 387

28

29  
30 388 (b) The emotional burden of caregiving remains poorly investigated. Nonetheless, narratives  
31  
32 389 show that caregivers deeply participate in the patient's illness experience, while the in-depth  
33  
34 interviews recommend a psychological support to help them accept the condition, while  
35 390 potentially improving the care pathway.  
36  
37 391

38

39  
40 392 (c) The need for an RPE65-related IRDs "culture" emerges as crucial to acknowledge these  
41  
42 393 conditions, to avoid perpetuating the stigma and the scepticism and to foster the debate on  
43  
44 diversity at society level.  
45 394

46

47 395 Since narratives were anonymous, we are not able to precisely state the misalignment between  
48  
49 396 patients and caregivers regarding the performance of daily activities and the perception of VRQoL;  
50  
51 moreover, the voluntary participation in the project may have constituted a selection bias and  
52 397 included mostly patients more comfortable with writing. Further investigations are needed to  
53  
54 398 examine in more details the issues which spontaneously emerged, also involving the work sphere.  
55  
56 399

57

58  
59 400 The annual incidence of RPE65-related IRDs explains the low number of participating patients [46];  
60

60

1  
2  
3  
4  
5  
6  
7  
8  
9  
10  
11  
12  
13  
14  
15  
16  
17  
18  
19  
20  
21  
22  
23  
24  
25  
26  
27  
28  
29  
30  
31  
32  
33  
34  
35  
36  
37  
38  
39  
40  
41  
42  
43  
44  
45  
46  
47  
48  
49  
50  
51  
52  
53  
54  
55  
56  
57  
58  
59  
60

401 however, the narratives collected suggest a strong dedication to the project and a relationship of  
402 trust between patients, caregivers and the retinologists from the centres involved. Finally, the data  
403 collection phase partially coincided with the local measures decided by the Italian government to  
404 contain the Sars-Cov-2 pandemic, with consequences on the clinical follow-up and the participation  
405 in the project.

## 406 **CONCLUSION**

407 The project investigated the practical and emotional issues of RPE65-related IRDs as experienced by  
408 patients, caregivers, and retinologists, and provided insights from MDT professionals and PA  
409 members. It represented the first Italian project that simultaneously addresses and integrates these  
410 perspectives, whose comparison allowed to provide preliminary suggestions useful for the clinical  
411 practice and the knowledge of RPE65-related IRDs. NM allowed to connect the impact of RPE65-  
412 related IRDs on quality-of-life domains with real-life experiences, emerging as informative in raising  
413 suggestions to improve the care pathway for these conditions.

## 414 **Abbreviations**

415 IRDs – Inherited Retinal Disorders

416 RPE65 – Retinal pigment epithelium-specific 65 kDa protein

417 LCA – Leber congenital amaurosis

418 RP – Retinitis Pigmentosa

419 VRQoL – Vision-Related Quality of Life

420 WHO – World Health Organization

421 NM – Narrative Medicine

422 MDTs – Multidisciplinary teams

423 PA – Patient Association

424 WCAG – Web Content Accessibility Guidelines

1  
2  
3  
4  
5  
6  
7  
8  
9  
10  
11  
12  
13  
14  
15  
16  
17  
18  
19  
20  
21  
22  
23  
24  
25  
26  
27  
28  
29  
30  
31  
32  
33  
34  
35  
36  
37  
38  
39  
40  
41  
42  
43  
44  
45  
46  
47  
48  
49  
50  
51  
52  
53  
54  
55  
56  
57  
58  
59  
60

425 SRQR – Standards for Reporting Qualitative Research

## 426 **DECLARATIONS**

### 427 **Ethics approval**

428 The project was conducted according to the Declaration of Helsinki. The Ethical Committee of the  
Luigi Vanvitelli University Hospital (Naples, Italy) approved the project rationale, design,  
429 investigation questionnaires and informed consent in September 2020 (protocol ID 20964/2020).

### 431 **Consent to participate**

432 Participants provided a web-based informed consent before their involvement and after being  
433 briefed on the purposes of the research and the procedures for the processing of personal data,  
434 according to General Data Protection Regulation of the European Union 2016/679 and the Italian  
435 Law 196/2003. The clinicians involved obtained a written informed consent to participate from the  
436 parents of underage patients during the first briefing on the project's methods and purposes.

### 437 **Consent for publication**

438 Not applicable.

### 439 **Data sharing**

440 All datasets used and analyzed during the current research are available in Italian from the  
441 corresponding author, upon reasonable request.

### 442 **Competing interests**

443 MA and NF are employees of Novartis Pharmaceuticals, Italy, and Region Europe. FS, BF, GB, and GI  
444 have received honoraria from Novartis Pharmaceuticals, Italy, for holding webinars. FS, AS, IP, IDR  
445 have received honoraria from Novartis Pharmaceuticals, Italy, for serving on advisory boards.

### 446 **Funding**

447 Novartis Farma unconditionally supported ISTUD Foundation for the realisation of the project.

### 448 **Authors' contributions**

1  
2  
3  
4  
5  
6  
7  
8  
9  
10  
11  
12  
13  
14  
15  
16  
17  
18  
19  
20  
21  
22  
23  
24  
25  
26  
27  
28  
29  
30  
31  
32  
33  
34  
35  
36  
37  
38  
39  
40  
41  
42  
43  
44  
45  
46  
47  
48  
49  
50  
51  
52  
53  
54  
55  
56  
57  
58  
59  
60

449 FS, AS, BF, GB, GI, AA, LR, NF and MA were involved in the project's conceptualization. MGM, LR,  
450 and AF were involved in the methodology. FS, AS, BF, GB, GI, VDI, DG, GP, AA, GBV, AC, SDS, IDR, SF,  
451 CM, DPM, VM, IP and ST contributed to the project's investigation. RL and MA were involved in the  
452 project's administration. LR and AF contributed to data analysis. FS, AS, BF, GI, VDI, DG, GP, AA, LR  
453 and MA contributed to data validation. AF, LR and MA were involved in writing; all authors  
454 contributed to the manuscript review and read and approved the final draft for submission.

### Acknowledgements

456 The authors wish to thank Novartis Farma Italia that sponsored and funded this work, especially  
457 Vincenza Vinaccia for her editorial assistance. The authors would also thank Paolo Melillo from  
458 Vanvitelli University Hospital for the support provided for the Ethical Committee's approval of the  
459 project, as well as the researchers of Healthcare Area of ISTUD Foundation for their useful role  
460 throughout the project, as well as all the people suffering from an RPE65-related IRD, their  
461 caregivers, the healthcare professionals and the Patient Association representatives who took part  
462 in the research.

### References

- 464 1. Broadgate S, Yu J, Downes SM, Halford S. Unravelling the genetics of inherited retinal  
465 dystrophies: Past, present and future. *Progress in Retinal and Eye Research*. 2017; 59.
- 466 2. Ziccardi L, Cordeddu V, Gaddini L, Matteucci A, Parravano M, Malchiodi-Albedi F, et al. Gene  
467 therapy in Retinal Dystrophies. *In J Mol Sci*. 2019 Nov 14; 20(22).
- 468 3. Kang C, Scoo LJ. Voretigene Neparvovec: A Review in RPE65 Mutation-Associated Inherited  
469 Retinal Dystrophy. *Mol Diagn Ther*. 2020 Aug; 24(4).
- 470 4. Duncan JL, Pierce A, Laster AM, Daiger SP, Birch DG, Ash JD, et al. Inherited retinal  
471 degenerations: Current landscape and knowledge gaps. *Transl Vis Sci Technol*. 2018;7.
- 472 5. Tsang SH, Sharma T. Leber Congenital Amaurosis. *Adv Exp Med Biol*. 2018; 1085.
- 473 6. Tsang SH, Sharma T. Retinitis Pigmentosa (Non-syndromic). *Adv Exp Med Biol*. 2018; 1085.



1

2

3 474

4

5 475

6

7 476

8

9 477

10 478

11

12 479

13

14 480

15

16 481

17

18 482

19

20 483

21

22 484

23 485

24

25 486

26

27 487

28

29 488

30

31 489

32

33 490

34 491

35

36 492

37

38 493

39

40 494

41

42 495

43

44 496

45 497

46

47 498

48

49 499

50

51 500

52

53 501

54

55 502

56 503

57

58 504

59

60 505

7. Jacobson SG, Aleman Ts, Cideciyan AV, Roman AJ, Sumaroka A, Windsor EA, et al. Defining the residual vision in Leber congenital amaurosis caused by RPE65 mutations. *Invest Ophthalmol Vis Sci*. 2009 May; 50(5).
8. Russell S, Bennet J, Wellman JA, Chung DC, Yu ZF, Tillman A, et al. Efficacy and safety of voretigene neparvovec (AAV2-hRPE65v2) in patients with RPE65-mediated inherited retinal dystrophy: a randomised, controlled, open-label, phase 3 trial. *Lancet*. 2017 Aug 26;390(10097).
9. Thompson DA, Ali RR, Banin E, Branham KE, Flannery JG, Gamm DM, et al. Advancing therapeutic strategies for inherited retinal degeneration: recommendations from the Monaciano Symposium. *Invest Ophthalmol Vis Sci*. 2015;56(2).
10. Thurston M, Thurston A, McLeod J. Socio-emotional effects of the transition from sight to blindness. *British Journal of Visual Impairment*. 2010; 28(2).
11. Prem Senthil MP, Khadka J, Pesudovs K. Seeing through their eyes: lived experiences of people with retinitis pigmentosa. *Eye*. 2017;31(5).
12. Bittner AK, Edwards L, George M. Coping strategies to manage stress related to vision loss and fluctuations in retinitis pigmentosa. *Optometry*. 2010; 81(9).
13. Lloyd A, Piglowska N, Ciulla T, Pitluck S, Johnson S, Buessing M, et al. Estimation of impact of RPE65-mediated inherited retinal disease on quality of life and the potential benefits of gene therapy. *Br J Ophthalmol*. 2019 Nov;103(11).
14. Chacón-López H, Pelayo FJ, López-Justicia MD, Morillas CA, Urena R, Chacon-Medina A, Pino B. Visual training and emotional state of people with retinitis pigmentosa. *J Rehabil Res Dev*. 2013;50.
15. Kempen GI, Ranchor AV, Ambergen T, Zijlstra GR. The mediating role of disability and social support in the association between low vision and depressive symptoms in older adults. *Qual Life Res*. 2014; 23(3).
16. Parmeggiani F, Sato G, De Nadai K, Romano MR, Binotto A, Costagliola C. Clinical and Rehabilitative Management of Retinitis Pigmentosa: Up-to-Date. *Curr Genomics*. 2011 Jun;12(4).
17. Garip G, Kamal A. Systematic review and meta-synthesis of coping with retinitis pigmentosa: implications for improving quality of life. *BMC Ophthalmology* (2019) 19.
18. Pierret J. The illness experience: state of knowledge and perspectives for research. *Sociol Health Illn*. 2003; 25.

- 1  
2  
3 506 19. Greenhalgh T. Cultural contexts of health: the use of narrative research in the health sector.  
4  
5 507 Copenhagen: WHO Regional Office for Europe; 2016, Health Evidence Network (HEN)  
6  
7 508 synthesis report 49. [http://www.euro.who.int/](http://www.euro.who.int/__data/assets/pdf_file/0004/317623/HEN-)  
8  
9 509 [synthesis-report-49.pdf](http://www.euro.who.int/__data/assets/pdf_file/0004/317623/HEN-synthesis-report-49.pdf), last accessed on March 23, 2021.
- 10  
11 510 20. Nowaczyk MJ. Narrative medicine in clinical genetics practice. *Am J Med Genet A.* 2012  
12 511 Aug;158A(8).
- 14 512 21. Ragusa L, Crinò A, Grugni G, Reale L, Fiorencis A, Licenziati MR. Caring and living with Prader-  
15  
16 513 Willi syndrome in Italy: integrating children, adults and parents' experiences through a  
17  
18 514 multicenter narrative medicine research. *BMJ Open* 2020;10.
- 19  
20 515 22. Marini MG. *Narrative Medicine: Bridging the Gap between Evidence-based Care and Medical*  
21  
22 516 *Humanities*. London: Springer International Publishing 2016.
- 23 517 23. Kleinman A. *The Illness Narrative, Suffering and Healing the Human Condition*. New York:  
24  
25 518 Basic Book 1989.
- 27 519 24. Greenhalgh T, Hurwitz B. Why study narrative? *BMJ* 1999; 318.
- 29 520 25. Marini MG, *Languages of Care in Narrative Medicine. Words, Space and Time in the*  
30  
31 521 *Healthcare Ecosystem*. London: Springer International Publishing 2019.
- 32  
33 522 26. Fioretti C, Mazzocco K, Riva S, Oliveri S, Masiero M, Pravettoni G. Research studies on  
34 523 patients' illness experience using the Narrative Medicine approach: a systematic review. *BMJ*  
35  
36 524 *Open* 2016; 6.
- 38 525 27. Simonelli F, Sodi A, Falsini B, et al. Care pathway of RPE65-related inherited retinal disorders  
39  
40 526 from early symptoms to genetic counseling: a multicenter Narrative Medicine project in  
41  
42 527 Italy. *Clinical Ophthalmology*. In Press, 2021.
- 43 528 28. Audo I, Williamson N, Bradley H, Barclay M, Sims J, Arbuckle R, et al. Qualitative exploration  
44  
45 529 of patient and caregiver experiences of visual function impairments and impacts on vision-  
46  
47 530 dependent activities of daily living and health-related quality of life associated with Retinitis  
48  
49 531 Pigmentosa and Leber Congenital Amaurosis in Germany and France. *Invest. Ophthalmol.*  
50  
51 532 *Vis. Sci.* 2021;62(8):3585.
- 52  
53 533 29. Kay C, Williamson N, Bradley H, Barclay M, Sims J, Arbuckle R, et al. Qualitative interviews  
54  
55 534 with patients and caregivers regarding visual function impairments and impacts on vision-  
56 535 dependent activities of daily living and health-related quality of life in RPE65-related Retinitis  
57  
58 536 Pigmentosa and Leber Congenital Amaurosis. *Invest. Ophthalmol. Vis. Sci.* 2021;62(8):3589.  
59  
60

- 1  
2  
3 537 30. Web Content Accessibility Guidelines (WCAG) 2.1. W3C Recommendations 05 June 2018.  
4 Available at <https://www.w3.org/TR/WCAG21/>, last accessed March 23, 2021.  
5 538  
6  
7 539 31. Reid K, Soundy A. A qualitative study examining the illness narrative master plots of people  
8 with head and neck cancer. *Behav Sci* 2019; 9.  
9 540  
10  
11 541 32. Peeters B, Marini M. Narrative medicine across languages and cultures: using minimal  
12 English for increased comparability of patients' narratives. In: Goddard C, ed. *Minimal*  
13 *English for a Global World: Improved Communication Using Fewer Words*. Basingstoke, UK:  
14 Palgrave Macmillan 2018: 259–86.  
15 544  
16  
17 545 33. Charon R. The patient-physician relationship. *Narrative Medicine: a model for empathy,*  
18 *reflection, profession, and trust.* *JAMA* 2001; 286.  
19 546  
20  
21 547 34. Banfi P, Cappuccio A, Latella ME, et al. Narrative medicine to improve the management and  
22 quality of life of patients with COPD: the first experience applying parallel chart in Italy. *Int J*  
23 *Chron Obstruct Pulmon Dis* 2018; 13.  
24 548  
25 549  
26  
27 550 35. Brédart A, Marrel A, Abetz-Webb L, Lasch K, Acquadro C. Interviewing to develop Patient-  
28 Reported Outcome (PRO) measures for clinical research: eliciting patients' experience.  
29 *Health Qual Life Outcomes.* 2014 Feb 5.  
30 552  
31  
32 553 36. Regulation (EU) 2016/679 of the European Parliament and of the Council of 27 April 2016 on  
33 the protection of natural persons with regard to the processing of personal data and on the  
34 free movement of such data and repealing Directive 95/46/EC (General Data Protection  
35 Regulation. Published on the Official Journal of the European Union L 119, May 4, 2016.  
36 <https://eur-lex.europa.eu/legal-content/EN/TXT/PDF/?uri=CELEX:32016R0679>,  
37 last  
38 accessed on March 23, 2021.  
39 558  
40  
41 559 37. Personal data code protection. Legislat. Decree no. 196 of 30 June 2003. Published on the  
42 Italian Official Journal n. 174, July 29, 2003, Supplementary n. 123.  
43 <https://www.camera.it/parlam/leggi/deleghe/Testi/03196dl.htm>,  
44 last  
45 accessed on March  
46 23, 2021.  
47 561  
48  
49 562 38. Bazeley P, Jackson K. *Qualitative Data Analysis with NVivo*. London: SAGE 2013.  
50 563  
51 564 39. Hsieh HF, Shannon SE. Three approaches to qualitative content analysis. *Qual Health Res.*  
52 2005 Nov;15(9):1277-88. doi: 10.1177/1049732305276687. PMID: 16204405.  
53 565  
54 566 40. Bury M. Illness narratives: fact or fiction? *Sociology of Health and Illness.* 2001;23(3).  
55 567  
56 568 41. Gibbs RW Jr. How metaphors shape the particularities of illness and healing experiences.  
57 *Transcult Psychiatry.* 2020 Nov 18:1363461520965424.

- 1  
2  
3 569 42. Tong A, Sainsbury P, Craig J. Consolidated criteria for reporting qualitative research  
4 (COREQ): a 32-item checklist for interviews and focus groups. *Int J Qual Health Care*. 2007  
5 570 Dec;19(6).  
6  
7 571  
8  
9 572 43. Goffman E. *Stigma*. London: Penguin, 1963.  
10  
11 573 44. Spiegel T, De Bel V, Steverink N. Keeping up appearances: the role of identity concealment  
12 574 in the workplace among adults with degenerative eye conditions and its relationship with  
13 wellbeing and career outcomes. *Disabil Rehabil*. 2016;38(7)  
14 575  
15  
16 576 45. Prem Senthil M, Khadka J, Gilhotra JS, Simon S, Pesudovs K. Exploring the quality of life  
17 issues in people with retinal diseases: a qualitative study. *J Patient Rep Outcomes*.  
18 577 2017;1(1).  
19  
20 578  
21  
22 579 46. Lorenz B, Tavares J, van den Born LI, Marques JP, Scholl HPN; EVICR.net Group. Current  
23 580 management of patients with RPE65 mutation-associated inherited retinal degenerations  
24 (IRDs) in Europe. Results of a multinational survey by the European Vision Institute Clinical  
25 581 Research Network EVICR.net. *Ophthalmic Res*. 2021 Mar 8.  
26  
27 582  
28

## 29 583 **Figure legend**

30  
31  
32 584 Figure 1 – Kleinman’s classification: distribution and quotes from narratives.

33  
34 585 Figure 2 – Bury’s classification: distribution and quotes from narratives.

35  
36  
37 586 Figure 3 – Metaphors used to describe RPE65-related IRDs: distribution and examples.

38  
39 587 Figure 4 – Reported limitations in activities by patients and caregivers: essential data.

40  
41 588 Figure 5 – Patients’ QoL and RPE65-related IRDs overall interference on activities as perceived by  
42 patients and caregivers.  
43  
44 589  
45  
46  
47  
48  
49  
50  
51  
52  
53  
54  
55  
56  
57  
58  
59  
60

Figure 1 — Kleinman's classification: distribution and quotes from narratives

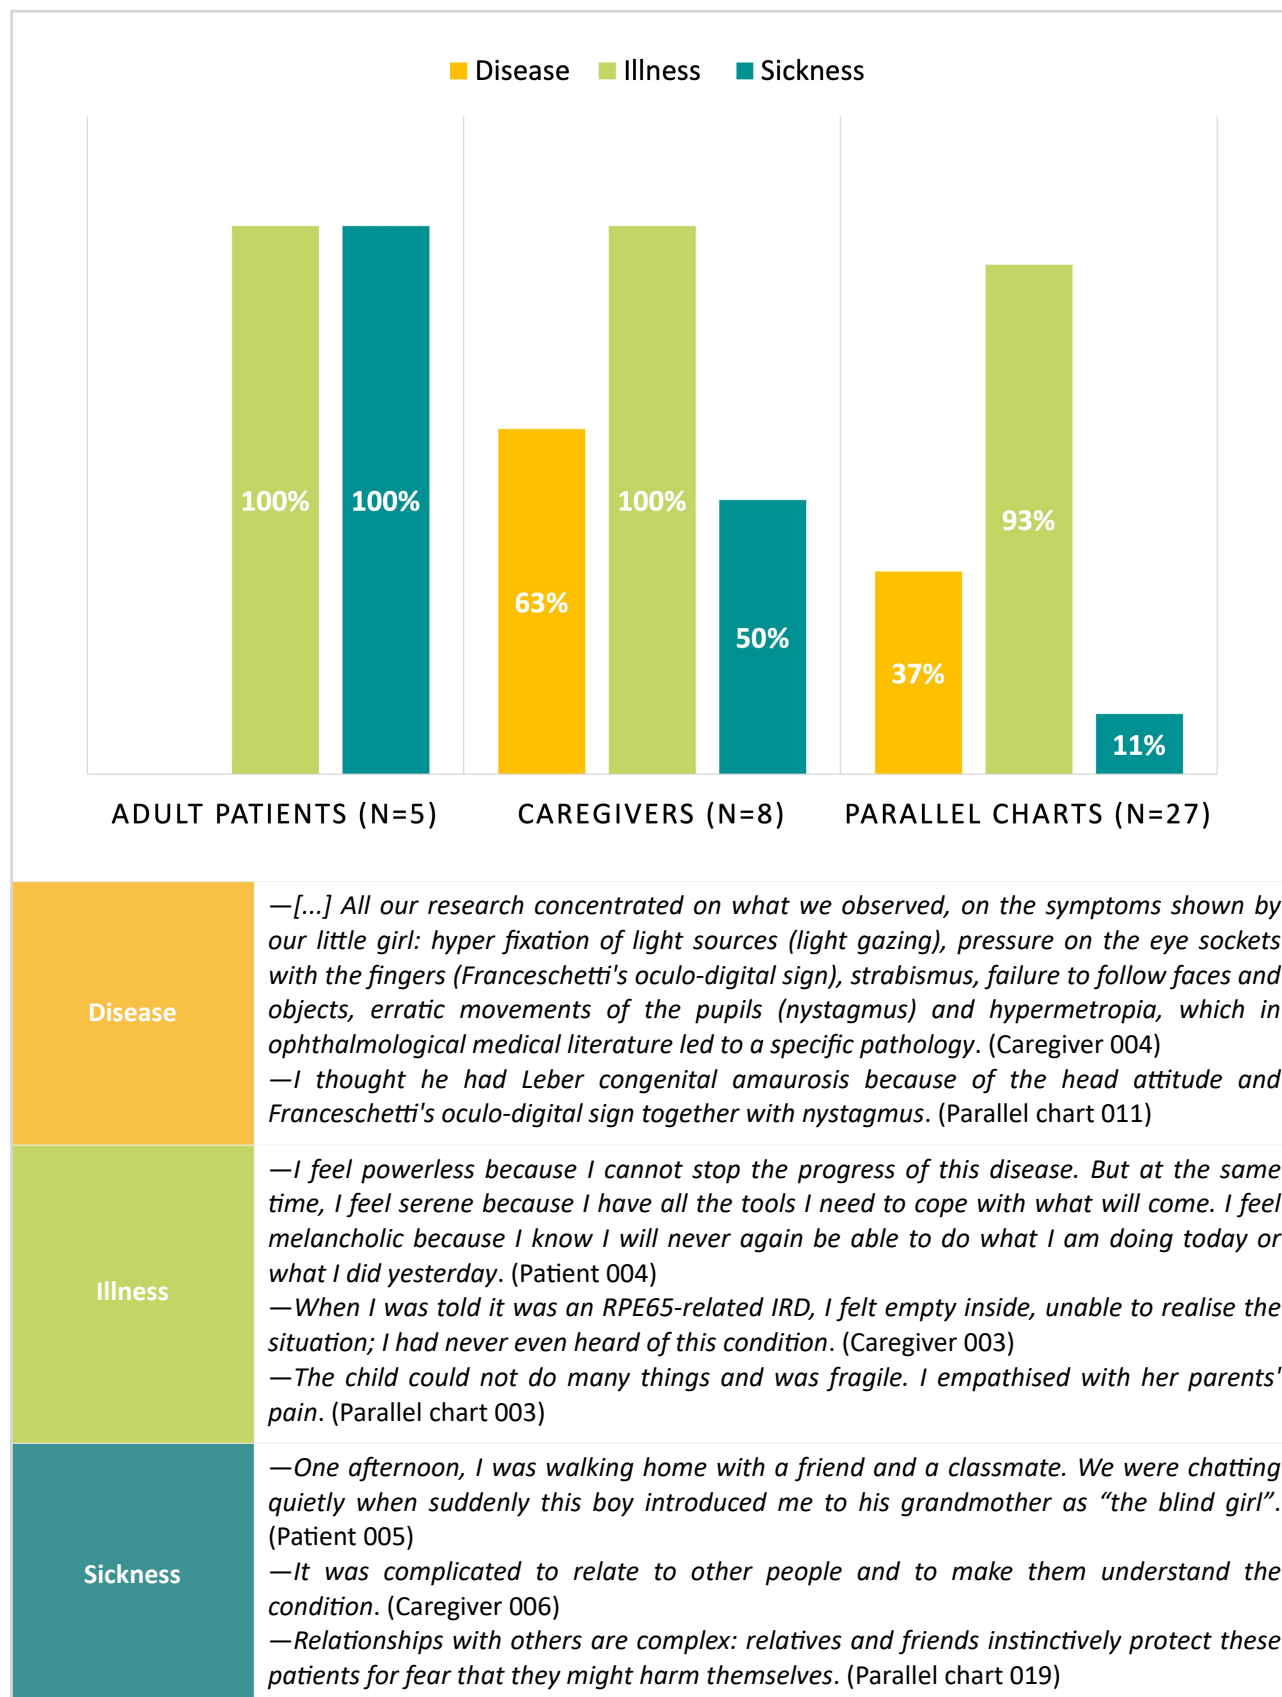

Figure 2 — Bury’s classification: distribution and quotes from narratives

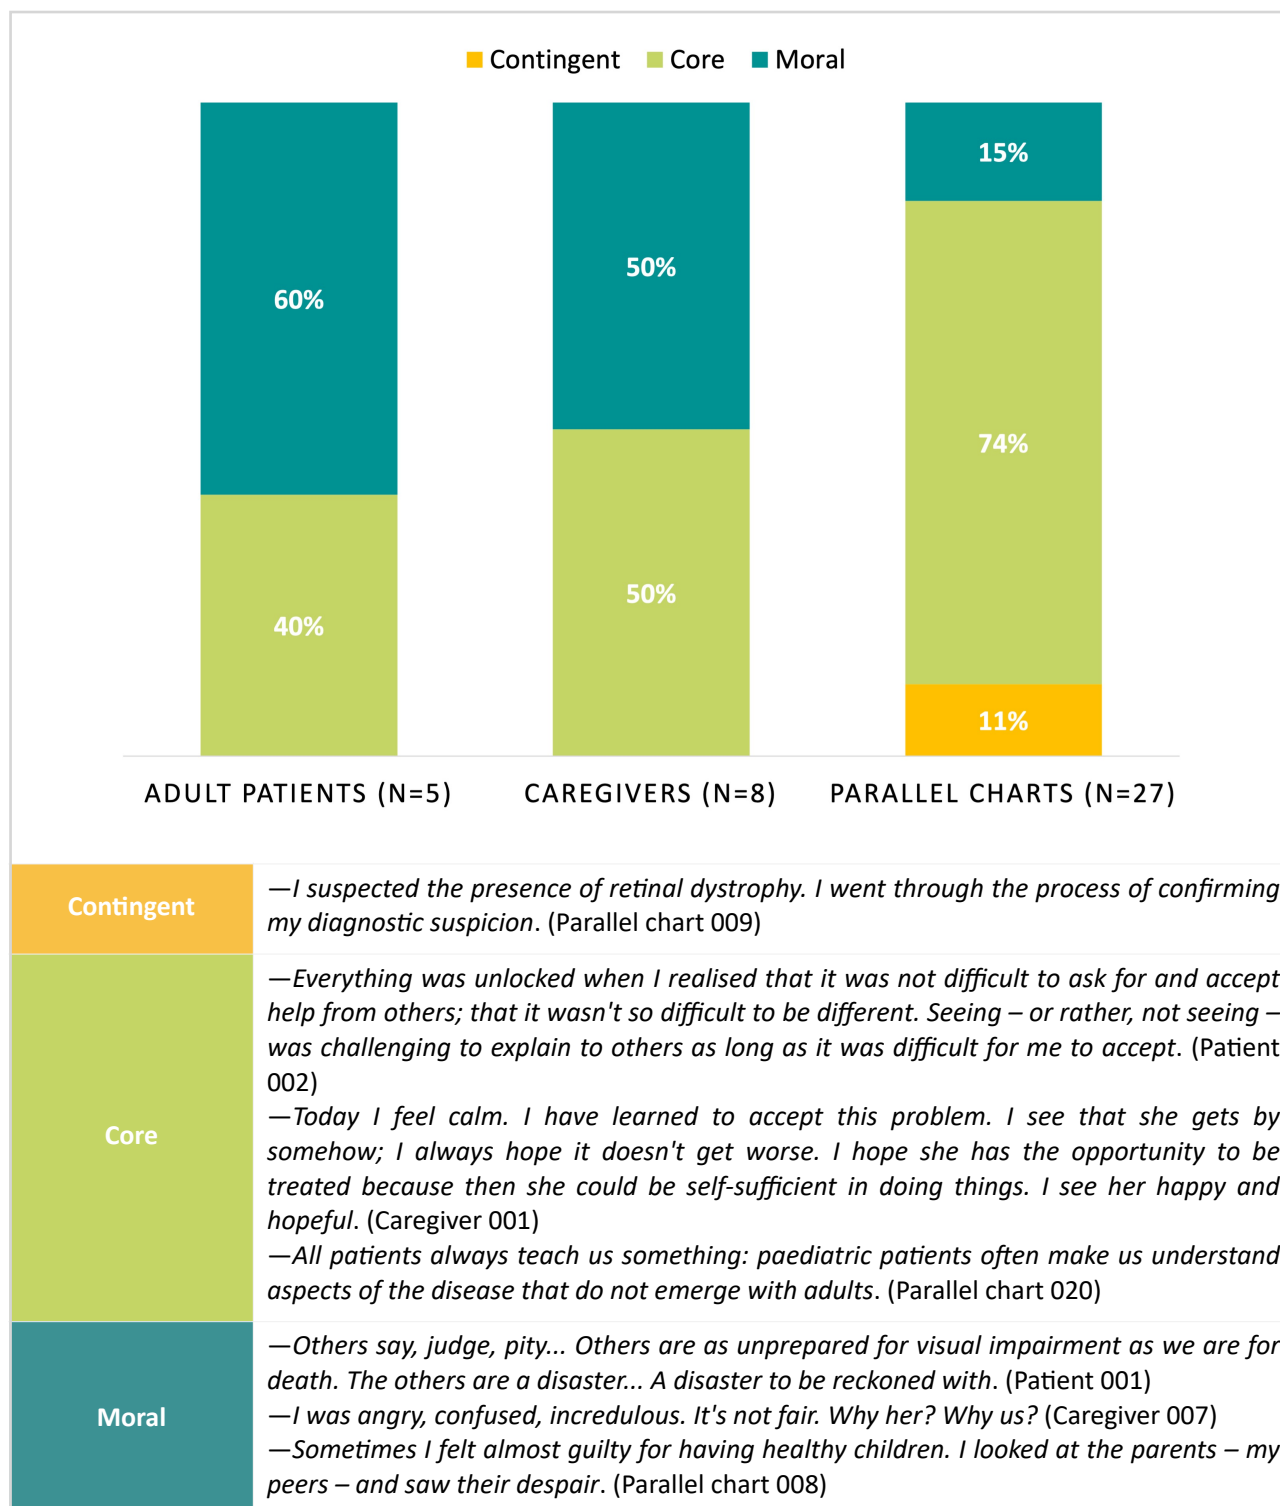

**Figure 3 - Metaphors used to describe RPE65-related IRDs: distribution and examples**

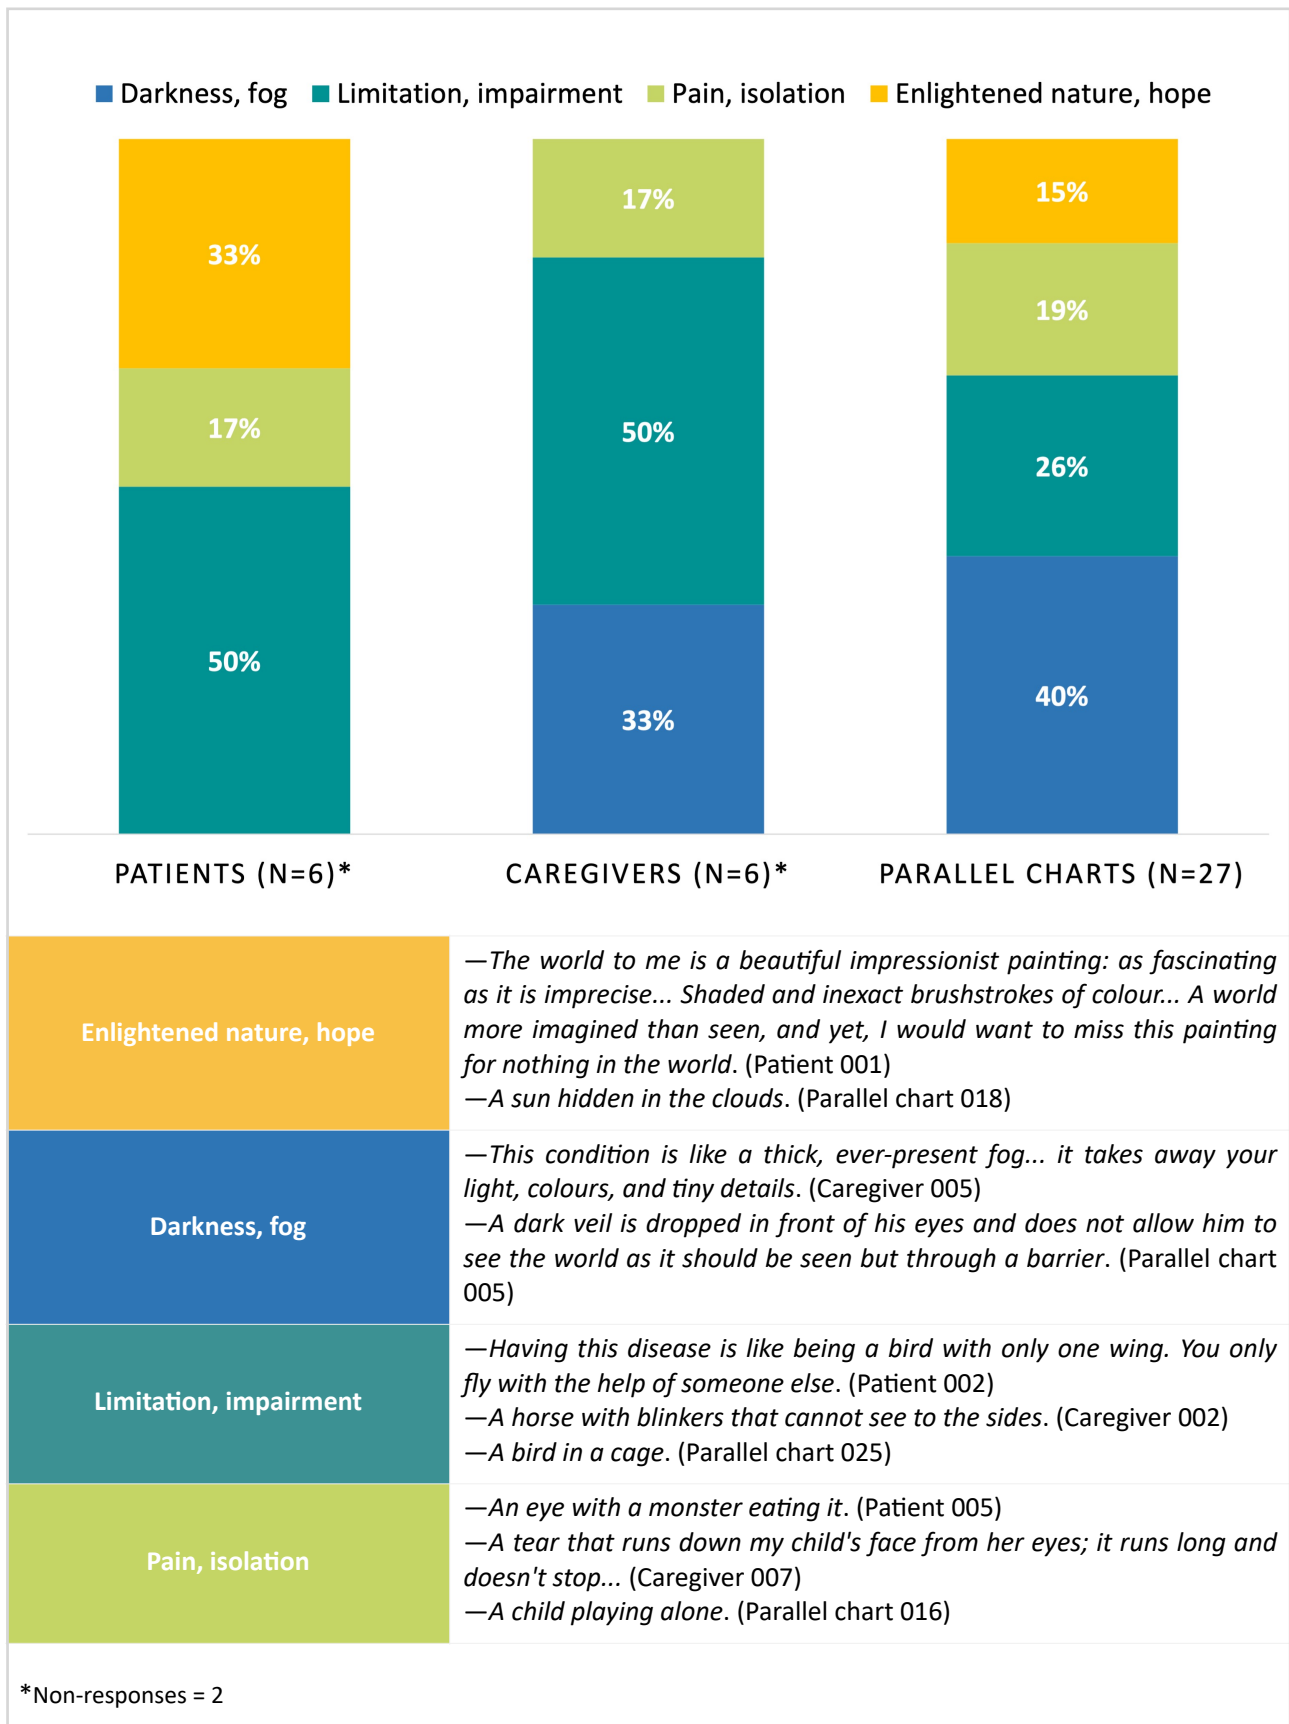

Figure 4 - Reported limitations in activities by patients and caregivers: essential data

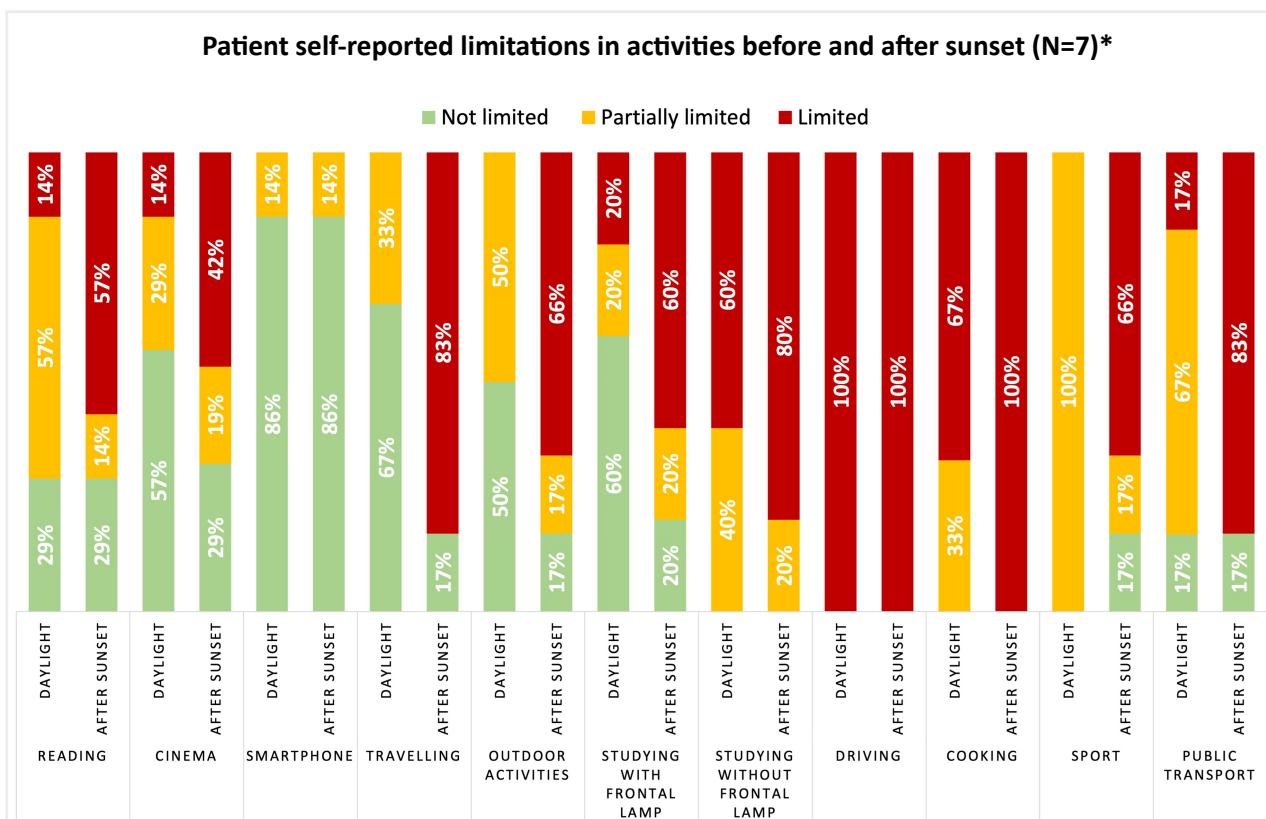

\*Non-responses = 1

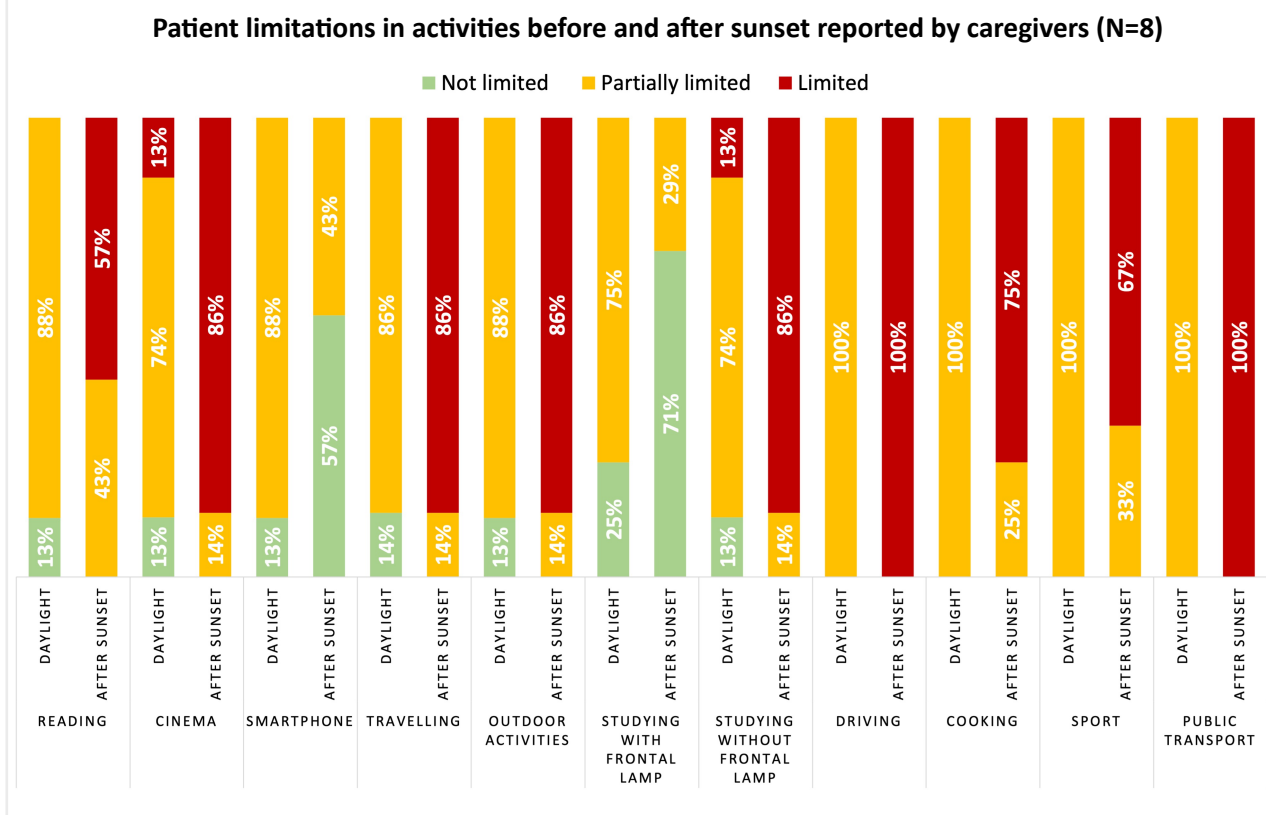



Figure 5 - Patients' QoL and RPE65-related IRDs overall interference on activities as perceived by patients and caregivers



## Supplementary file 1

### Eye clinics specialised in Inherited Retinal Disorders (IRDs) involved in the BIRDS project

1. CRR Hereditary Retinal Degeneration, Careggi University Hospital – Florence, Italy
2. Paediatric Ophthalmology Unit, Children’s Hospital A. Meyer – Florence, Italy
3. Department of Ophthalmology, Fondazione Policlinico Universitario A. Gemelli IRCCS, Università Cattolica del Sacro Cuore – Rome, Italy
4. Ophthalmology Department, Bambino Gesù IRCCS Paediatric Hospital – Rome, Italy
5. Multidisciplinary Department of Medical Surgical and Dental Specialties, Luigi Vanvitelli University Hospital – Naples, Italy

## Supplementary file 2 – Illness plots and parallel chart

### 2.1. Illness plot addressed to patients

*We invite you to tell us about your experience of living with a hereditary retinal disorder related to the RPE65 gene (RPE65-related IRD). You can write instinctively and freely, regardless of the form and length of your narrative. Any episode you consider significant will be welcome.*

Before the IRD clinical diagnosis... The first signs that something was wrong... I felt... To understand what it was about... The facilities I visited, the healthcare professionals I met... Waiting for the clinical diagnosis... When they told me that it was an IRD, I felt... The genetic test for me was... That time, with family... With others... For me, seeing was... The activities I liked to do... The activities I could not do... At school/work... Healthcare professionals and treatments were... The centre where I am treated... Healthcare professionals and treatments are... Gene therapy for me is... Between one visit and the next... With my family... With other people... For me, seeing is... The activities I like to do... The activities I cannot do... Today at school/work... Rethinking about my care pathway, I would have liked that... Thinking about tomorrow, I feel... For tomorrow, I would like to...

*Thank you for your time, energy and attention. We ask you one last question: How did you feel about writing your experience?*

### 2.2. Illness plot addressed to caregivers of patients with an RPE65-related IRD

*We invite you to tell us about your experience of living next to a person with a hereditary retinal disorder related to the RPE65 gene (RPE65-related IRD). You can write instinctively and freely, regardless of the form and length of your narrative. Any episode you consider significant will be welcome.*

Before the diagnosis of IRD... When we first noticed that something was wrong... I felt... She/he felt... To find out what it was... Looking at her/him I thought... The facilities we visited, the healthcare professionals we met... Before the IRD clinical diagnosis... When we were told that it was an IRD, I felt... For me, the genetic test was... At that time, she/he with the family... She/he with other people... For her/him, seeing was... The activities she/he liked to do... The activities she/he could not do... At school/work... For her/him, I wanted... Healthcare professionals and treatments were... Today I feel... Today she/he feels... The IRD is... The centre where she/he is treated... Treatments and caregivers are... Gene therapy for me is... Between one visit and the next... With family... With other people... For her/him, seeing is... The activities she/he likes to do... The activities she/he cannot do... Rethinking to the care pathway, I would have liked that... Thinking about tomorrow, I feel... For tomorrow, I would like to...

*Thank you for your time, energy and attention. We ask you one last question: How did you feel about writing your experience?*

### 2.3. Parallel chart on patients affected by an RPE65-related IRD addressed to healthcare professionals

The first time I saw this person with an IRD, I thought... The patient and her/his relatives told me... Addressing symptoms, they told me that she/he could do/not do... I felt... And I did... Waiting for the clinical diagnosis... When I had to communicate the clinical diagnosis... Proposing the genetic test was... The relationships with family and other people of the person with IRD... For her/him, seeing was... Between one visit and the next... In her/his activities at work/study/play... Today this person... With family and other people... Today this person, during work/study/play... The people next to her/him... My goal for this patient is... With her/him I feel... From the relationship with the patient, I've learned... For tomorrow, I wish that I... For tomorrow I hope she/he...

*Thank you for your time, energy and attention. We ask you one last question: How did you feel about writing your experience?*

## Supplementary file 3

### 3.1. Narrative from an underaged patient affected by an RPE65-related IRD

My mum realised that something was wrong when I was very young, about 18 months. I never felt different and was unaware of the difficulties. The professionals I met were helpful, kind, welcoming people who made me feel at home. While waiting for the diagnosis, I was very calm. When they told me that it was a hereditary retinal disease, nothing had changed for me. My eyes did not work as well as a healthy child's. The genetic test was a big step for me. The genetic test was just another test for me. At that time, we were very relaxed in my family. We had no particular problems with others. I've always seen that way. I don't know how others see. I like skating, dancing and cycling. At first, I could not ride a bike, then I did. I like school a lot, so I do not have any difficulties.

Some pills I will remember all my life because they were terrible, but the rest of the treatment was easy. Today I feel happy. The disease is stable for now, and I feel calm. I have more than one centre, and they are doing everything they can. The doctors are very nice and friendly, and I don't have any special treatment. Gene therapy is a great possibility for me because it will help keep my eyes stable, which would be very positive. Between one visit and the next, I feel calm and have no particular tension. I feel very relaxed with my family. With others, I am a sunny child. Seeing is a beautiful thing because it allows me to relate to the outside world. I like riding my bike, being with my animals, being with friends. I cannot do team sports. School is going well, and I feel at ease; I am learning to use the computer. Rethinking about the care pathway, I think everyone did what they could and what was right to do. When I think about tomorrow, I feel happy with the people who love me, and I would like everything to remain as it is now.

### 3.2. Narrative from an adult patient affected by an RPE65-related IRD

I don't remember a precise year, but the first signs that something was wrong were around the age of 6 or 7 when we were driving at night, and I realised that I couldn't see what my father needed to go. I could only see the light sources but not what they were illuminating. When I was 15 years old, I was driving back to the institute on Sunday afternoons; it got dark on the way, and I had a hard time walking from the station to the institute. If I had to walk together with other blind people, I would have done it with ease. I felt very uncomfortable, inappropriate, and inexplicably clumsy. In the evenings, I could not move to go out alone. If I accompanied other blind people, even two, I felt no discomfort, and the journeys went smoothly. I knew about my illness. I also met ophthalmologists who seemed to know less about it than I did. For the hope of treatment or recovery, ophthalmologists had already been consulted for my brother before I was born, or at least when I was small. While waiting for the diagnosis, I never had any expectations. When I learned that it was a hereditary disease, I was a child, and I had no reaction. I did the genetic test when I was 54 and, since I knew that there is a lot of retinitis, it was pure curiosity. Is it positive or negative to learn at 54 what exactly you have? Negative because it shows how much interest there is in such a disease: very little. It's good that research is going on, even if it's at a snail's pace. Only my mother has an attitude of some hope.

1  
2  
3 Having changed places I've gone to live [...] I have no way of comparing before and after. I never hid  
4 my problem, so they took me as I was. Seeing, even a little, even with difficulty, even when the  
5 amount of light allowed me to do things, "seeing" was, of course, more accessible. But since I knew  
6 that I would lose my sight sooner or later and that this took place over quite an extended period, I  
7 used these facts to run for cover, with the aim of not stopping. I liked cycling, which is different from  
8 riding a tandem bike, going out to look for glimpses of views, reading comics. The reading in black  
9 and the cycle rides gradually faded away. At school: I couldn't see the blackboard and do my home-  
10 work alone. At work, as a teacher, I couldn't fill in the register by myself.

11 I only went for specific treatments for retinitis, useless but specific.

12 Today I feel the same as I did before. The disease has degenerated almost to the end. Functionally I  
13 am blind. Every now and then, I play the lamppost game, trying to catch the light from the lampposts  
14 as we walk down the street... in the evening.

15 When I go to the centre, I spend no less than 4 hours there, and 2 of them are waiting. So far, the  
16 people working there feel welcoming and helpful. So far, I've only had check-ups. I see gene therapy  
17 as an attempt to maintain the current faculties of the retina. We are still far from hoping for any  
18 kind of recovery, let alone a recovery measurable in tenths. I don't know why I've only had one visit  
19 to date where this therapy was mentioned for the first time. My family and I are on the same wave-  
20 length at the moment. So the family attends events to support my needs as they arise. I go to the  
21 swimming pool to do water gymnastics, with the others from our sports club we organise dinners in  
22 the dark. I have weekly music rehearsals with a group where only I am blind, we go to play in clubs,  
23 I go to see sculpture exhibitions if it is allowed to touch, of course. With my wife, who is also blind,  
24 we travel: when I have the chance, I like to get to know the cities, walking in their historical centres,  
25 alone. I read and listen to music. Unfortunately, I like to eat, so every opportunity is good to try a  
26 new restaurant. In everyday life, I am autonomous. Since there are many things I can do as a blind  
27 person, it seems useless to me to try at all costs to do something where sight is the only possibility.  
28 Like, for example: driving. I am autonomous in my activities; I only find difficulties when the com-  
29 puter aids are not adequate or modify the websites without considering the rules needed to include  
30 visually impaired users. I have been using personal assistants selected and trained by me for years  
31 in those areas where only sight works. Thinking back to my own care path, I would have liked to  
32 have had this care in the 1960s. My future is not conditioned by the presence of this care. But it  
33 seems worthwhile to me to do it: what will be, will be. We visually impaired people need civilisation.  
34 If in the behaviour of citizens, people, institutions, the observance of rules also prevails in the reali-  
35 sation of public and social things, we are in the right place. But in our society, this does not happen  
36 to a sufficient extent, so tomorrow will still be about making do as one can, with or without this  
37 care.

### 3.3. Narrative from a caregiver of a patient affected by an RPE65-related IRD

38 We toured the hospitals in our region. Visit after visit, the anamnesis and electrophysiological ex-  
39 aminations were not sufficient for a diagnosis. Many signs and symptoms were confused between  
40 the different diseases affecting the retina. At six months, we realised that something was wrong  
41 with the involuntary eye movement, always searching for light, the lack of eye contact between

1  
2  
3 mother and child during breastfeeding. I felt an immense sense of absolute helplessness as a parent  
4 in front of her baby. I really needed to understand why... He is a very peaceful child; he plays, jumps,  
5 learns something new every day and knows how to give so much love. To understand what it was  
6 all about, we researched the subject because it helps us accept. I would see him and think that it's  
7 just a bad dream, with the hope of waking up to normality. We met very helpful and wonderful  
8 people.  
9

10  
11 When they told us that we needed to take a genetic test, I thought that there were no relatives with  
12 severe vision problems; it seemed so absurd. The genetic test was a simple saliva sample that al-  
13 lowed for greater accuracy; the genetic diagnosis was essential to know the gene that causes the  
14 disease. The wait for the diagnosis seemed like an eternity. The diagnosis, when it came, was a  
15 starting point; news like that turns your life upside down. He is a very calm child and learns every  
16 day to become more and more autonomous. When they told us that it was a hereditary retinal  
17 disease, I felt terrible because you don't expect it. It seems impossible to me to have a congenital  
18 disorder of a genetic nature in a family where there were no known cases. At that time, the envi-  
19 ronment was fundamental because I was more autonomous. At home, with the organisation of  
20 spaces, he moves on his own, and so he gets used to making do. He is friendly and loves being with  
21 other kids; he is cheerful, curious, and intelligent. There is a difference between seeing the light and  
22 not seeing it at all, so we are confident that everything has not degenerated. He likes to do every-  
23 thing, watch cartoons and knows some dialogues by heart. Among the activities he finds hard to do  
24 are playing football, drawing, playing basketball. As a parent, the only thing you want in life is to  
25 protect your children. It is challenging to live with this disease because I have mortifications in every  
26 area of life. We are waiting for the gene therapy to finally allow us to see the light at the end of the  
27 tunnel.  
28

29  
30 Today I feel very serene, and I never stop dreaming that after the discovery, the waiting, the hope,  
31 the light will finally come. Today he feels more peaceful, and day after day, he learns to be more  
32 vital to face his life. The disease is genetic, rare, incurable; we are healthy carriers of the defect and  
33 have passed it on to our son. The hospital that is treating us is a centre of excellence, and we have  
34 carried out the genetic test. Getting a diagnosis for a rare disease is not always easy. It is a long and  
35 tiring process. The time between checks is too long. For me, gene therapy would be the miracle we  
36 have been waiting for, as we are entering an era where diseases that were once incurable are be-  
37 coming curable. Thanks to the love of those around him, he is learning to live with all the strength  
38 he needs. He is an adorable child and knows how to make others love him. He is a very healthy child  
39 who rarely gets sick. His eyesight is not yet very impaired; otherwise, he is very cheerful. Rethinking  
40 the care pathway, I would have liked to have had more information on this disease's knowledge,  
41 together with the proper psychological and educational support. If I had to imagine a service for all  
42 the people with the same disease as my son, I would think of a specialised centre for this disease,  
43 which could guarantee proper support for parents who face enormous difficulties. When I think of  
44 tomorrow, I don't know what awaits us. Still, we are very enthusiastic about the progress of science.  
45 I would like to see proper care centres and improved schooling for people with this disease in the  
46 future. Reading difficulties are essential, and there is a lack of adequate tools to deal with them.  
47  
48  
49  
50  
51  
52  
53  
54  
55  
56  
57  
58  
59  
60

### 3.4. Parallel chart on a patient affected by an RPE65-related IRD from a healthcare professional

1  
2  
3  
4  
5  
6  
7  
8  
9  
10  
11  
12  
13  
14  
15  
16  
17  
18  
19  
20  
21  
22  
23  
24  
25  
26  
27  
28  
29  
30  
31  
32  
33  
34  
35  
36  
37  
38  
39  
40  
41  
42  
43  
44  
45  
46  
47  
48  
49  
50  
51  
52  
53  
54  
55  
56  
57  
58  
59  
60

Poor child: he is not living his life like his other healthy peers. The parents reported that they needed advice on how to make him as autonomous as possible. He could not play, run, be independent in his personal and school affairs. He could not orientate himself in space. The situation worsened from sunset onwards when the child panicked. The whole family hardly ever went out in the evening, not even for a simple dinner. I felt obliged to build a personalised rehabilitation programme to find alternative strategies to give the family tools and reassure the child to increase his self-esteem. I asked the child to tell me everything he wanted to do, everything he thought to do poorly, and his fears when he got stuck on various occasions. I asked the parents what they saw when they were with their child, their fears, their difficulties, what they wanted help with, what they hoped for. I gradually started to indicate how to organise the house according to the child's size, what light or contrast measures should be taken and how to organise the school material to make it more usable. It was not my job to communicate the diagnosis.

Other people often do not understand what and how he sees, so it ranges from denial to being overprotective. To see was not to fall, not to stumble, play football, watch television together with the family, write in the notebook without difficulty, and read without difficulty. The family was heartened and happy about the small degree of autonomy their child was able to achieve. The child began to experiment on his own without requiring the constant presence of others. When studying, the child felt frustrated because he realised that he could not write or read like the others. He felt different because he could not demonstrate his abilities and was frustrated because he could not keep up with others.

Today, he is more confident about himself, his abilities and also his limits. He has learned to set himself small goals, overcome them with his own alternative strategies and move forward. With other people, he is more present and less dependent. At school, he has found his own alternative methods to do almost the same as other peers; he participates more in the class group and verbalises his visual difficulties when he has a problem. The people around him seem more serene and confident in his potential. My aim is to make him aware of his challenges to face them with alternative strategies and overcome them even if with limitations. I feel stimulated to find with him alternative solutions to make him autonomous. I am learning from the caring relationship that there is no limit to the potential.

I would like to be able to help them even more in the future. I would like him to be aware of how extraordinary his will power is.



# Supplementary file 4 – Reported limitations in activities by patients and caregivers

## 4.1. Patient self-reported limitations in activities before and after sunset (N=7\*)

1  
2  
3  
4  
5  
6  
7  
8  
9  
10  
11  
12  
13  
14  
15  
16  
17  
18  
19  
20  
21  
22  
23  
24  
25  
26  
27  
28  
29  
30  
31  
32  
33  
34  
35  
36  
37  
38  
39  
40  
41  
42  
43  
44  
45  
46



\*Non-responses: 1.

4.2. Patient limitations in activities before and after sunset reported by caregivers (N=8)



## Standards for Reporting Qualitative Research (SRQR)\*

<http://www.equator-network.org/reporting-guidelines/srqr/>

Page/line no(s).

### Title and abstract

|                                                                                                                                                                                                                                                              |                        |
|--------------------------------------------------------------------------------------------------------------------------------------------------------------------------------------------------------------------------------------------------------------|------------------------|
| <p><b>Title</b> - Concise description of the nature and topic of the study Identifying the study as qualitative or indicating the approach (e.g., ethnography, grounded theory) or data collection methods (e.g., interview, focus group) is recommended</p> | <p>p. 1, ll. 1-3</p>   |
| <p><b>Abstract</b> - Summary of key elements of the study using the abstract format of the intended publication; typically includes background, purpose, methods, results, and conclusions</p>                                                               | <p>p. 2, ll. 34-56</p> |

### Introduction

|                                                                                                                                                                     |                           |
|---------------------------------------------------------------------------------------------------------------------------------------------------------------------|---------------------------|
| <p><b>Problem formulation</b> - Description and significance of the problem/phenomenon studied; review of relevant theory and empirical work; problem statement</p> | <p>pp. 3-4, ll. 64-91</p> |
| <p><b>Purpose or research question</b> - Purpose of the study and specific objectives or questions</p>                                                              | <p>p. 4, ll. 92-101</p>   |

### Methods

|                                                                                                                                                                                                                                                                                                                                                                                                             |                             |
|-------------------------------------------------------------------------------------------------------------------------------------------------------------------------------------------------------------------------------------------------------------------------------------------------------------------------------------------------------------------------------------------------------------|-----------------------------|
| <p><b>Qualitative approach and research paradigm</b> - Qualitative approach (e.g., ethnography, grounded theory, case study, phenomenology, narrative research) and guiding theory if appropriate; identifying the research paradigm (e.g., postpositivist, constructivist/ interpretivist) is also recommended; rationale**</p>                                                                            | <p>p. 4, ll. 85-96</p>      |
| <p><b>Researcher characteristics and reflexivity</b> - Researchers' characteristics that may influence the research, including personal attributes, qualifications/experience, relationship with participants, assumptions, and/or presuppositions; potential or actual interaction between researchers' characteristics and the research questions, approach, methods, results, and/or transferability</p> | <p>p. 6, ll. 144-145</p>    |
| <p><b>Context</b> - Setting/site and salient contextual factors; rationale**</p>                                                                                                                                                                                                                                                                                                                            | <p>p. 5, ll. 109-118</p>    |
| <p><b>Sampling strategy</b> - How and why research participants, documents, or events were selected; criteria for deciding when no further sampling was necessary (e.g., sampling saturation); rationale**</p>                                                                                                                                                                                              | <p>p. 5, ll. 119-122</p>    |
| <p><b>Ethical issues pertaining to human subjects</b> - Documentation of approval by an appropriate ethics review board and participant consent, or explanation for lack thereof; other confidentiality and data security issues</p>                                                                                                                                                                        | <p>p. 6-7, ll. 150-158</p>  |
| <p><b>Data collection methods</b> - Types of data collected; details of data collection procedures including (as appropriate) start and stop dates of data collection and analysis, iterative process, triangulation of sources/methods, and modification of procedures in response to evolving study findings; rationale**</p>                                                                             | <p>pp. 5-6, ll. 123-145</p> |

|                       |                                                                                                                                                                                                                                                       |                      |
|-----------------------|-------------------------------------------------------------------------------------------------------------------------------------------------------------------------------------------------------------------------------------------------------|----------------------|
| 1<br>2<br>3<br>4<br>5 | <b>Data collection instruments and technologies</b> - Description of instruments (e.g., interview guides, questionnaires) and devices (e.g., audio recorders) used for data collection; if/how the instrument(s) changed over the course of the study | pp. 5-6, ll. 123-145 |
| 6<br>7<br>8           | <b>Units of study</b> - Number and relevant characteristics of participants, documents, or events included in the study; level of participation (could be reported in results)                                                                        | pp. 8, ll. 183-188   |
| 9<br>10<br>11<br>12   | <b>Data processing</b> - Methods for processing data prior to and during analysis, including transcription, data entry, data management and security, verification of data integrity, data coding, and anonymization/de-identification of excerpts    | pp. 7-8, ll. 159-181 |
| 13<br>14<br>15<br>16  | <b>Data analysis</b> - Process by which inferences, themes, etc., were identified and developed, including the researchers involved in data analysis; usually references a specific paradigm or approach; rationale**                                 | pp. 7-8, ll. 159-181 |
| 17<br>18<br>19<br>20  | <b>Techniques to enhance trustworthiness</b> - Techniques to enhance trustworthiness and credibility of data analysis (e.g., member checking, audit trail, triangulation); rationale**                                                                | //                   |

## Results/findings

|                      |                                                                                                                                                                                                   |                       |
|----------------------|---------------------------------------------------------------------------------------------------------------------------------------------------------------------------------------------------|-----------------------|
| 23<br>24<br>25<br>26 | <b>Synthesis and interpretation</b> - Main findings (e.g., interpretations, inferences, and themes); might include development of a theory or model, or integration with prior research or theory | pp. 7-16, ll. 169-300 |
| 27<br>28<br>29       | <b>Links to empirical data</b> - Evidence (e.g., quotes, field notes, text excerpts, photographs) to substantiate analytic findings                                                               | pp. 7-16, ll. 169-300 |

## Discussion

|                                        |                                                                                                                                                                                                                                                                                                                                                                                                             |                        |
|----------------------------------------|-------------------------------------------------------------------------------------------------------------------------------------------------------------------------------------------------------------------------------------------------------------------------------------------------------------------------------------------------------------------------------------------------------------|------------------------|
| 32<br>33<br>34<br>35<br>36<br>37<br>38 | <b>Integration with prior work, implications, transferability, and contribution(s) to the field</b> - Short summary of main findings; explanation of how findings and conclusions connect to, support, elaborate on, or challenge conclusions of earlier scholarship; discussion of scope of application/generalizability; identification of unique contribution(s) to scholarship in a discipline or field | pp. 17-20, ll. 316-392 |
| 39<br>40                               | <b>Limitations</b> - Trustworthiness and limitations of findings                                                                                                                                                                                                                                                                                                                                            | pp. 20-21, ll. 393-403 |

## Other

|                |                                                                                                                                               |                     |
|----------------|-----------------------------------------------------------------------------------------------------------------------------------------------|---------------------|
| 43<br>44<br>45 | <b>Conflicts of interest</b> - Potential sources of influence or perceived influence on study conduct and conclusions; how these were managed | pp. 22, ll. 440-443 |
| 46<br>47<br>48 | <b>Funding</b> - Sources of funding and other support; role of funders in data collection, interpretation, and reporting                      | p. 22, ll. 444-445  |

\*The authors created the SRQR by searching the literature to identify guidelines, reporting standards, and critical appraisal criteria for qualitative research; reviewing the reference lists of retrieved sources; and contacting experts to gain feedback. The SRQR aims to improve the transparency of all aspects of qualitative research by providing clear standards for reporting qualitative research.

1  
2  
3  
4  
5  
6  
7  
8  
9  
10  
11  
12  
13  
14  
15  
16  
17  
18  
19  
20  
21  
22  
23  
24  
25  
26  
27  
28  
29  
30  
31  
32  
33  
34  
35  
36  
37  
38  
39  
40  
41  
42  
43  
44  
45  
46  
47  
48  
49  
50  
51  
52  
53  
54  
55  
56  
57  
58  
59  
60

\*\*The rationale should briefly discuss the justification for choosing that theory, approach, method, or technique rather than other options available, the assumptions and limitations implicit in those choices, and how those choices influence study conclusions and transferability. As appropriate, the rationale for several items might be discussed together.

**Reference:**

O'Brien BC, Harris IB, Beckman TJ, Reed DA, Cook DA. **Standards for reporting qualitative research: a synthesis of recommendations.** *Academic Medicine*, Vol. 89, No. 9 / Sept 2014  
DOI: 10.1097/ACM.0000000000000388

For peer review only
