# Supplementary material for: Narrative medicine to investigate the quality of life and emotional impact of inherited retinal disorders through the perspectives of patients, caregivers and clinicians: an Italian multicentre project
Source: PubMed Central journal article supplement — BMJ Open. 2022 Sep 19;12(9):e061080. doi: 10.1136/bmjopen-2022-061080 (PMC9486281; doi:10.1136/bmjopen-2022-061080), 2022-09-19
Supplement: bmjopen-2022-061080supp001.pdf [file bmjopen-2022-061080supp001.pdf]

## Supplementary file 1

### Eye clinics specialised in Inherited Retinal Disorders (IRDs) involved in the BIRDS project

1. CRR Hereditary Retinal Degeneration, Careggi University Hospital – Florence, Italy
2. Paediatric Ophthalmology Unit, Children’s Hospital A. Meyer – Florence, Italy
3. Department of Ophthalmology, Fondazione Policlinico Universitario A. Gemelli IRCCS, Università Cattolica del Sacro Cuore – Rome, Italy
4. Ophthalmology Department, Bambino Gesù IRCCS Paediatric Hospital – Rome, Italy
5. Multidisciplinary Department of Medical Surgical and Dental Specialties, Luigi Vanvitelli University Hospital – Naples, Italy
