# Supplementary material for: Narrative medicine to investigate the quality of life and emotional impact of inherited retinal disorders through the perspectives of patients, caregivers and clinicians: an Italian multicentre project
Source: PubMed Central journal article supplement — BMJ Open. 2022 Sep 19;12(9):e061080. doi: 10.1136/bmjopen-2022-061080 (PMC9486281; doi:10.1136/bmjopen-2022-061080), 2022-09-19
Supplement: bmjopen-2022-061080supp002.pdf [file bmjopen-2022-061080supp002.pdf]

## Supplementary file 2 – Illness plots and parallel chart

### 2.1. Illness plot addressed to patients

*We invite you to tell us about your experience of living with a hereditary retinal disorder related to the RPE65 gene (RPE65-related IRD). You can write instinctively and freely, regardless of the form and length of your narrative. Any episode you consider significant will be welcome.*

Before the IRD clinical diagnosis... The first signs that something was wrong... I felt... To understand what it was about... The facilities I visited, the healthcare professionals I met... Waiting for the clinical diagnosis... When they told me that it was an IRD, I felt... The genetic test for me was... That time, with family... With others... For me, seeing was... The activities I liked to do... The activities I could not do... At school/work... Healthcare professionals and treatments were... The centre where I am treated... Healthcare professionals and treatments are... Gene therapy for me is... Between one visit and the next... With my family... With other people... For me, seeing is... The activities I like to do... The activities I cannot do... Today at school/work... Rethinking about my care pathway, I would have liked that... Thinking about tomorrow, I feel... For tomorrow, I would like to...

*Thank you for your time, energy and attention. We ask you one last question: How did you feel about writing your experience?*

### 2.2. Illness plot addressed to caregivers of patients with an RPE65-related IRD

*We invite you to tell us about your experience of living next to a person with a hereditary retinal disorder related to the RPE65 gene (RPE65-related IRD). You can write instinctively and freely, regardless of the form and length of your narrative. Any episode you consider significant will be welcome.*

Before the diagnosis of IRD... When we first noticed that something was wrong... I felt... She/he felt... To find out what it was... Looking at her/him I thought... The facilities we visited, the healthcare professionals we met... Before the IRD clinical diagnosis... When we were told that it was an IRD, I felt... For me, the genetic test was... At that time, she/he with the family... She/he with other people... For her/him, seeing was... The activities she/he liked to do... The activities she/he could not do... At school/work... For her/him, I wanted... Healthcare professionals and treatments were... Today I feel... Today she/he feels... The IRD is... The centre where she/he is treated... Treatments and caregivers are... Gene therapy for me is... Between one visit and the next... With family... With other people... For her/him, seeing is... The activities she/he likes to do... The activities she/he cannot do... Rethinking to the care pathway, I would have liked that... Thinking about tomorrow, I feel... For tomorrow, I would like to...

*Thank you for your time, energy and attention. We ask you one last question: How did you feel about writing your experience?*

### **2.3. Parallel chart on patients affected by an RPE65-related IRD addressed to healthcare professionals**

The first time I saw this person with an IRD, I thought... The patient and her/his relatives told me... Addressing symptoms, they told me that she/he could do/not do... I felt... And I did... Waiting for the clinical diagnosis... When I had to communicate the clinical diagnosis... Proposing the genetic test was... The relationships with family and other people of the person with IRD... For her/him, seeing was... Between one visit and the next... In her/his activities at work/study/play... Today this person... With family and other people... Today this person, during work/study/play... The people next to her/him... My goal for this patient is... With her/him I feel... From the relationship with the patient, I've learned... For tomorrow, I wish that I... For tomorrow I hope she/he...

*Thank you for your time, energy and attention. We ask you one last question: How did you feel about writing your experience?*
