# Supplementary material for: Narrative medicine to investigate the quality of life and emotional impact of inherited retinal disorders through the perspectives of patients, caregivers and clinicians: an Italian multicentre project
Source: PubMed Central journal article supplement — BMJ Open. 2022 Sep 19;12(9):e061080. doi: 10.1136/bmjopen-2022-061080 (PMC9486281; doi:10.1136/bmjopen-2022-061080), 2022-09-19

## Supplementary file 4 – Reported limitations in activities by patients and caregivers

### 4.1. Patient self-reported limitations in activities before and after sunset (N=7\*)

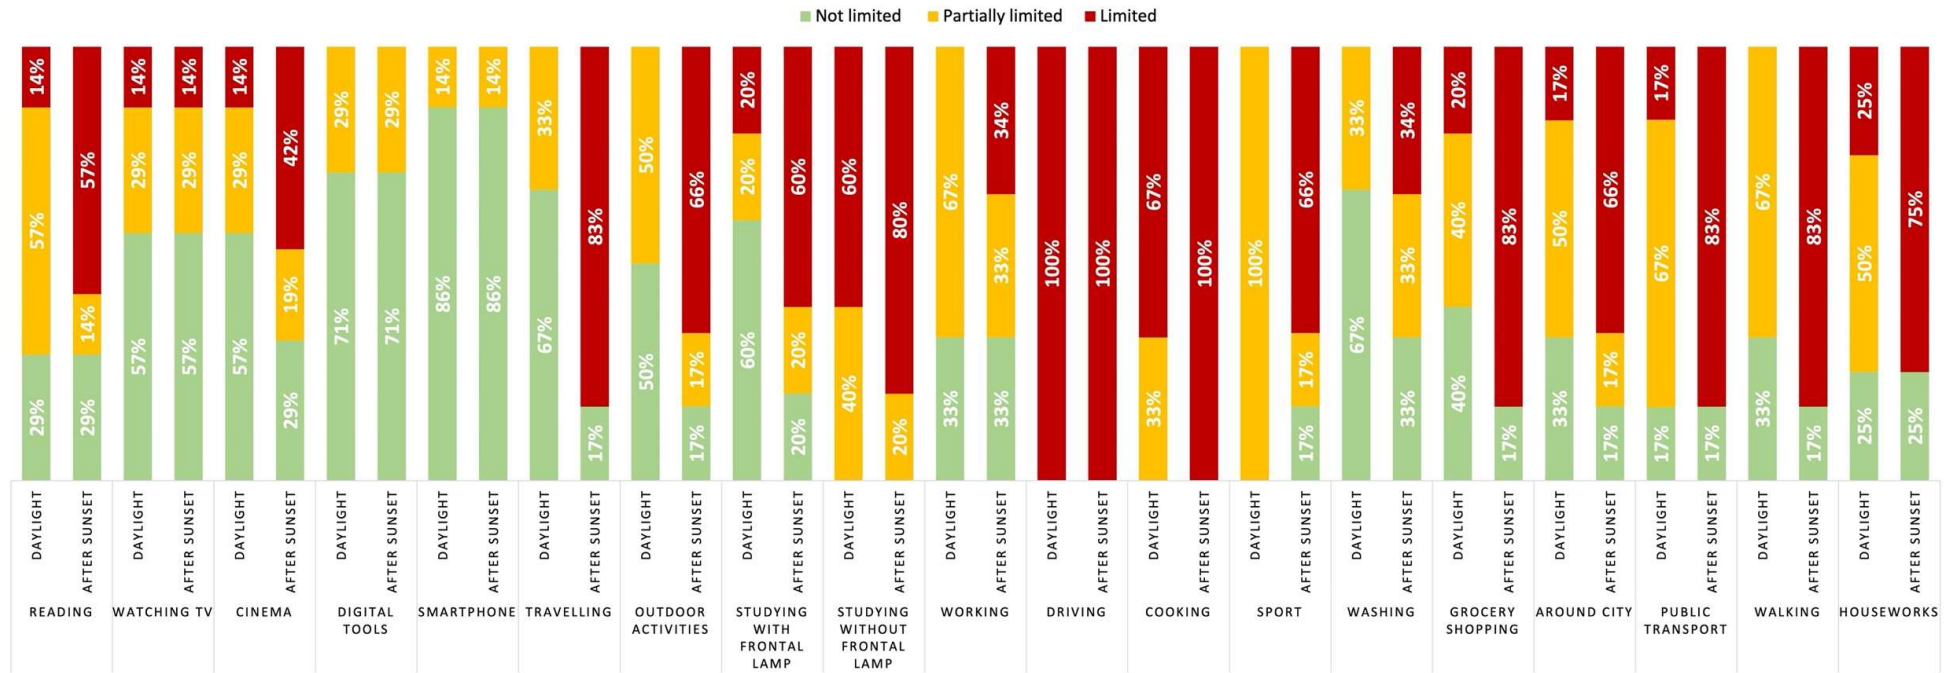

\*Non-responses: 1.

#### 4.2. Patient limitations in activities before and after sunset reported by caregivers (N=8)

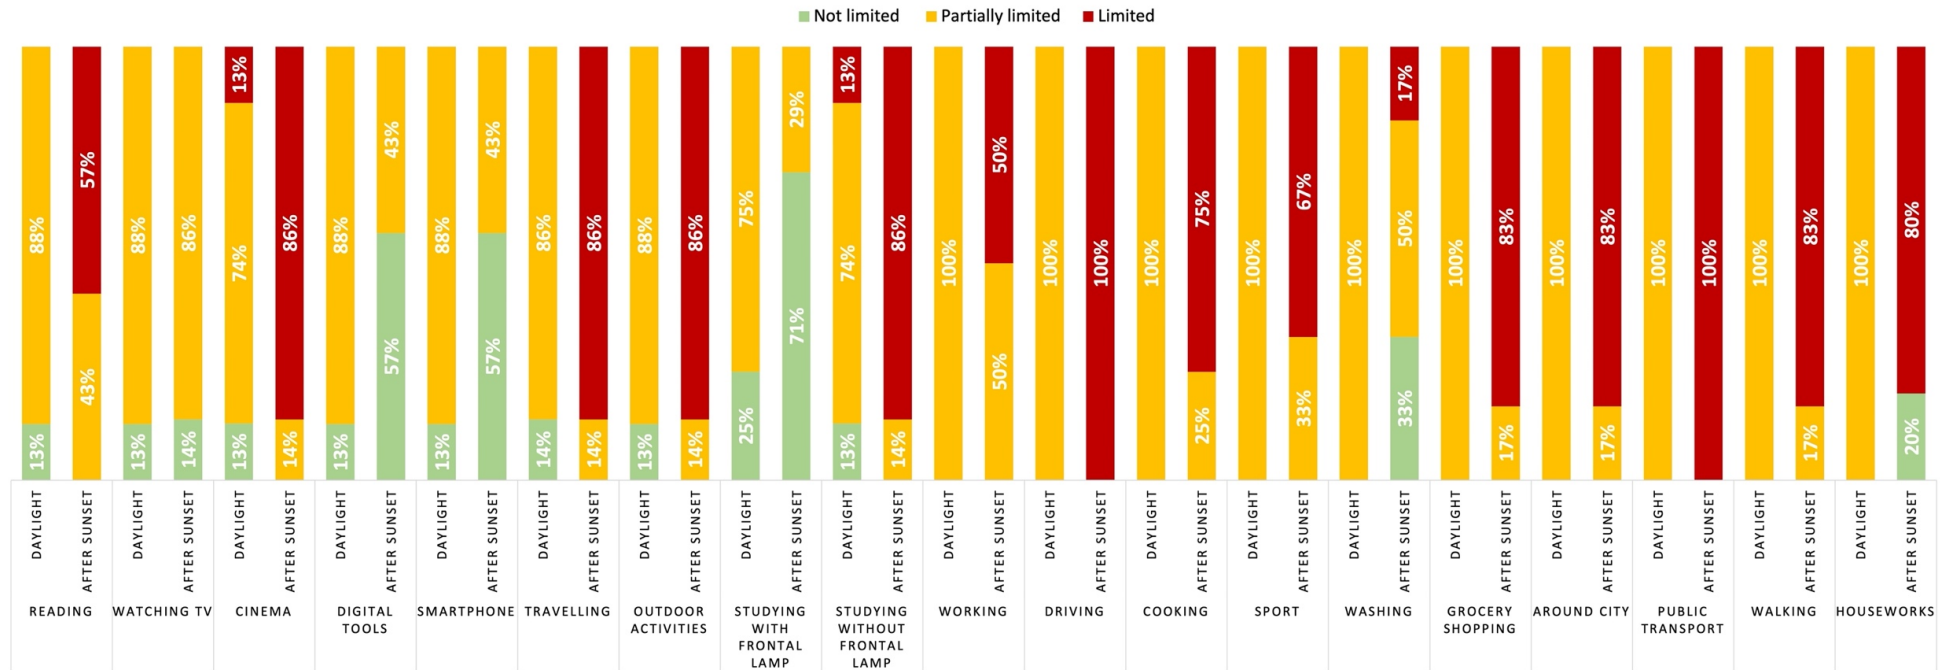

Supplement: bmjopen-2022-061080supp004.pdf [file bmjopen-2022-061080supp004.pdf]
